# Supplementary material for: On the radiation belt location during the 23rd and 24th solar cycles
Source: Copernicus journal article supplement (doi:10.5194/angeo-37-719-2019), 2019-08-13

Supplement of Ann. Geophys., 37, 719–732, 2019  
<https://doi.org/10.5194/angeo-37-719-2019-supplement>  
© Author(s) 2019. This work is distributed under  
the Creative Commons Attribution 4.0 License.

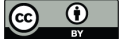

*Supplement of*

## **On the radiation belt location during the 23rd and 24th solar cycles**

**Alexei V. Dmitriev**

*Correspondence to:* Alexei V. Dmitriev (dalex@jupiter.ss.ncu.edu.tw)

The copyright of individual parts of the supplement might differ from the CC BY 4.0 License.

## **Contents of this file**

Page 2:

Caption of Set SW

Caption of Set map030

Caption of Set map100

Caption of Set map300

### *Additional Supporting Information*

Pages 3 – 18: Set SW

Pages 19 – 34: Set map030

Pages 35 – 50: Set map100

Pages 51 – 66: Set map300

Set SW. Solar wind and geomagnetic conditions for the quiet days. Panels from top to bottom: solar wind bulk velocity  $V$ ; solar wind dynamic pressure  $P_d$ ; interplanetary magnetic field magnitude  $B$  (blue dotted curve) and  $B_z$  component (black solid curve); auroral electrojet index  $AE$ ; storm-time  $Dst$  index. The day on June, indicated by vertical red dashed lines, is very quiet in the solar wind and geomagnetic parameters.

Upstream solar wind data are acquired from Wind upstream monitor (<https://cdaweb.sci.gsfc.nasa.gov/index.html/>)  
Geomagnetic parameters  $AE$  and  $Dst$  are provided by Kyoto WDC (<http://wdc.kugi.kyoto-u.ac.jp/wdc/Sec3.html>)

Set map030. Geographic maps of averaged electron fluxes with energies  $>30$  keV and pitch angles of  $\sim 90^\circ$  observed during quiet days by POES satellites at height of  $\sim 850$  km in 2 hour vicinity of local noon. The solid wide curve indicates the geomagnetic equator. The outer and inner electron belts and a slot region between them are clearly seen, respectively, at high and middle latitudes in the longitudinal range from  $\sim 90^\circ$  E to  $\sim 80^\circ$  W.

The POES data are provided by NOAA (<https://www.ngdc.noaa.gov/stp/satellite/poes/dataaccess.html>)

Set map100. Geographic maps of averaged electron fluxes with energies  $>100$  keV and pitch angles of  $\sim 90^\circ$  observed quiet days by POES satellites at height of  $\sim 850$  km in 2 hour vicinity of local noon. The solid wide curve indicates the geomagnetic equator. The outer and inner electron belts and a slot region between them are clearly seen, respectively, at high and middle latitudes in the longitudinal range from  $\sim 90^\circ$  E to  $\sim 80^\circ$  W.

The POES data are provided by NOAA (<https://www.ngdc.noaa.gov/stp/satellite/poes/dataaccess.html>)

Set map300. Geographic maps of averaged electron fluxes with energies  $>300$  keV and pitch angles of  $\sim 90^\circ$  observed quiet days by POES satellites at height of  $\sim 850$  km in 2 hour vicinity of local noon. The solid wide curve indicates the geomagnetic equator. The outer electron belt is clearly seen at high latitudes.

The POES data are provided by NOAA (<https://www.ngdc.noaa.gov/stp/satellite/poes/dataaccess.html>)

W1010628

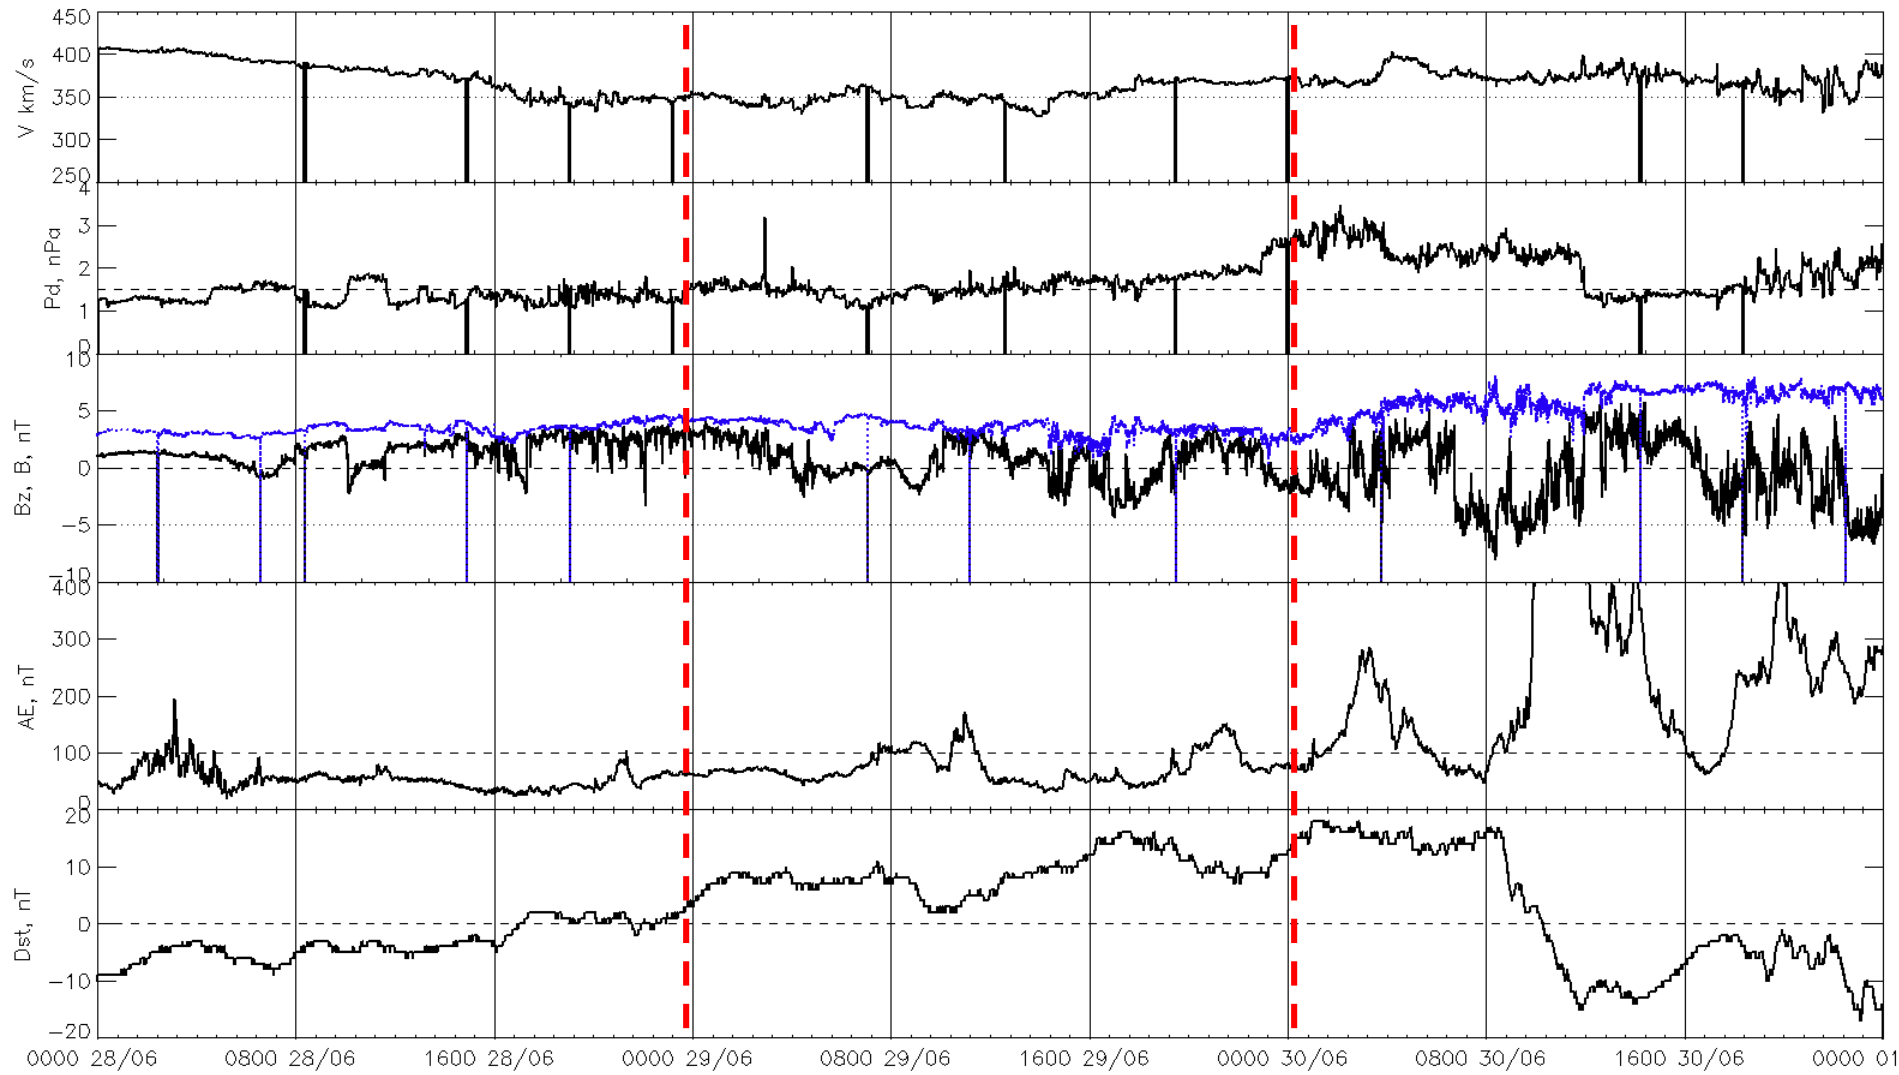

W1020627

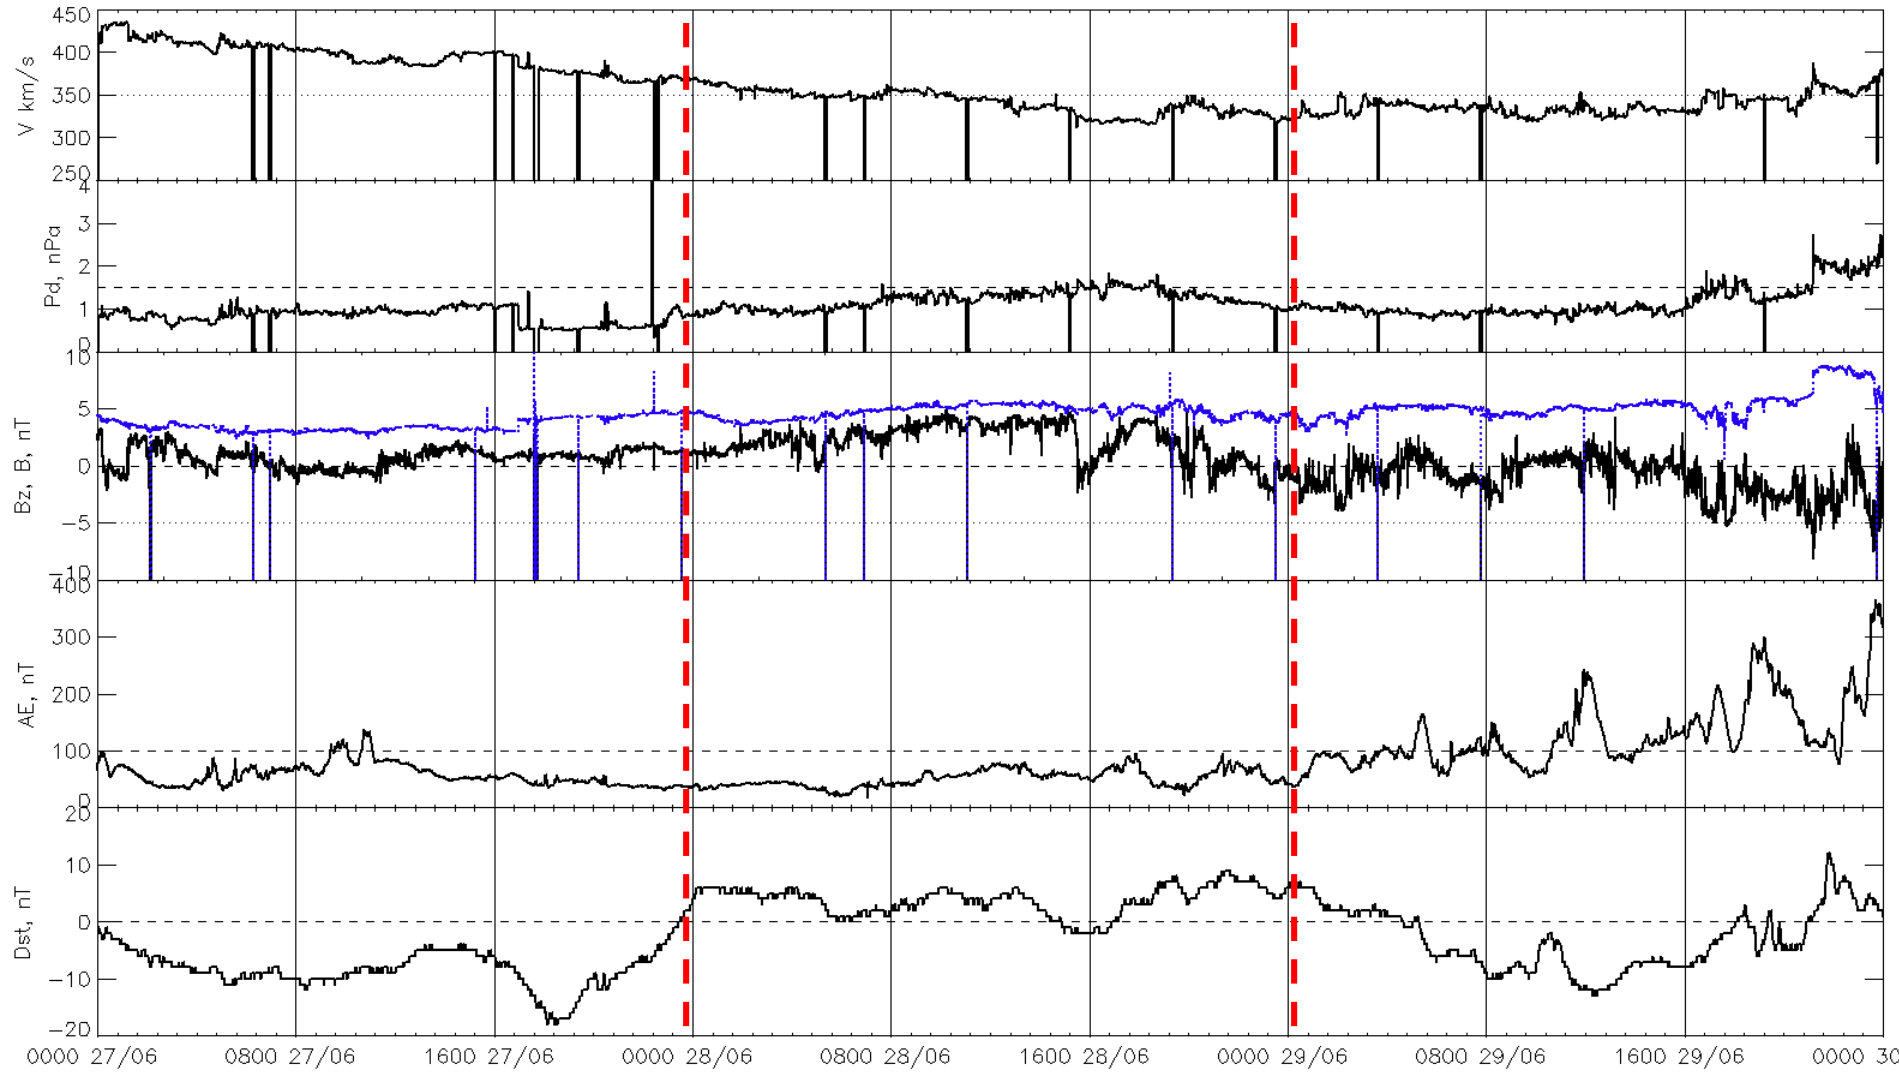

W1040623

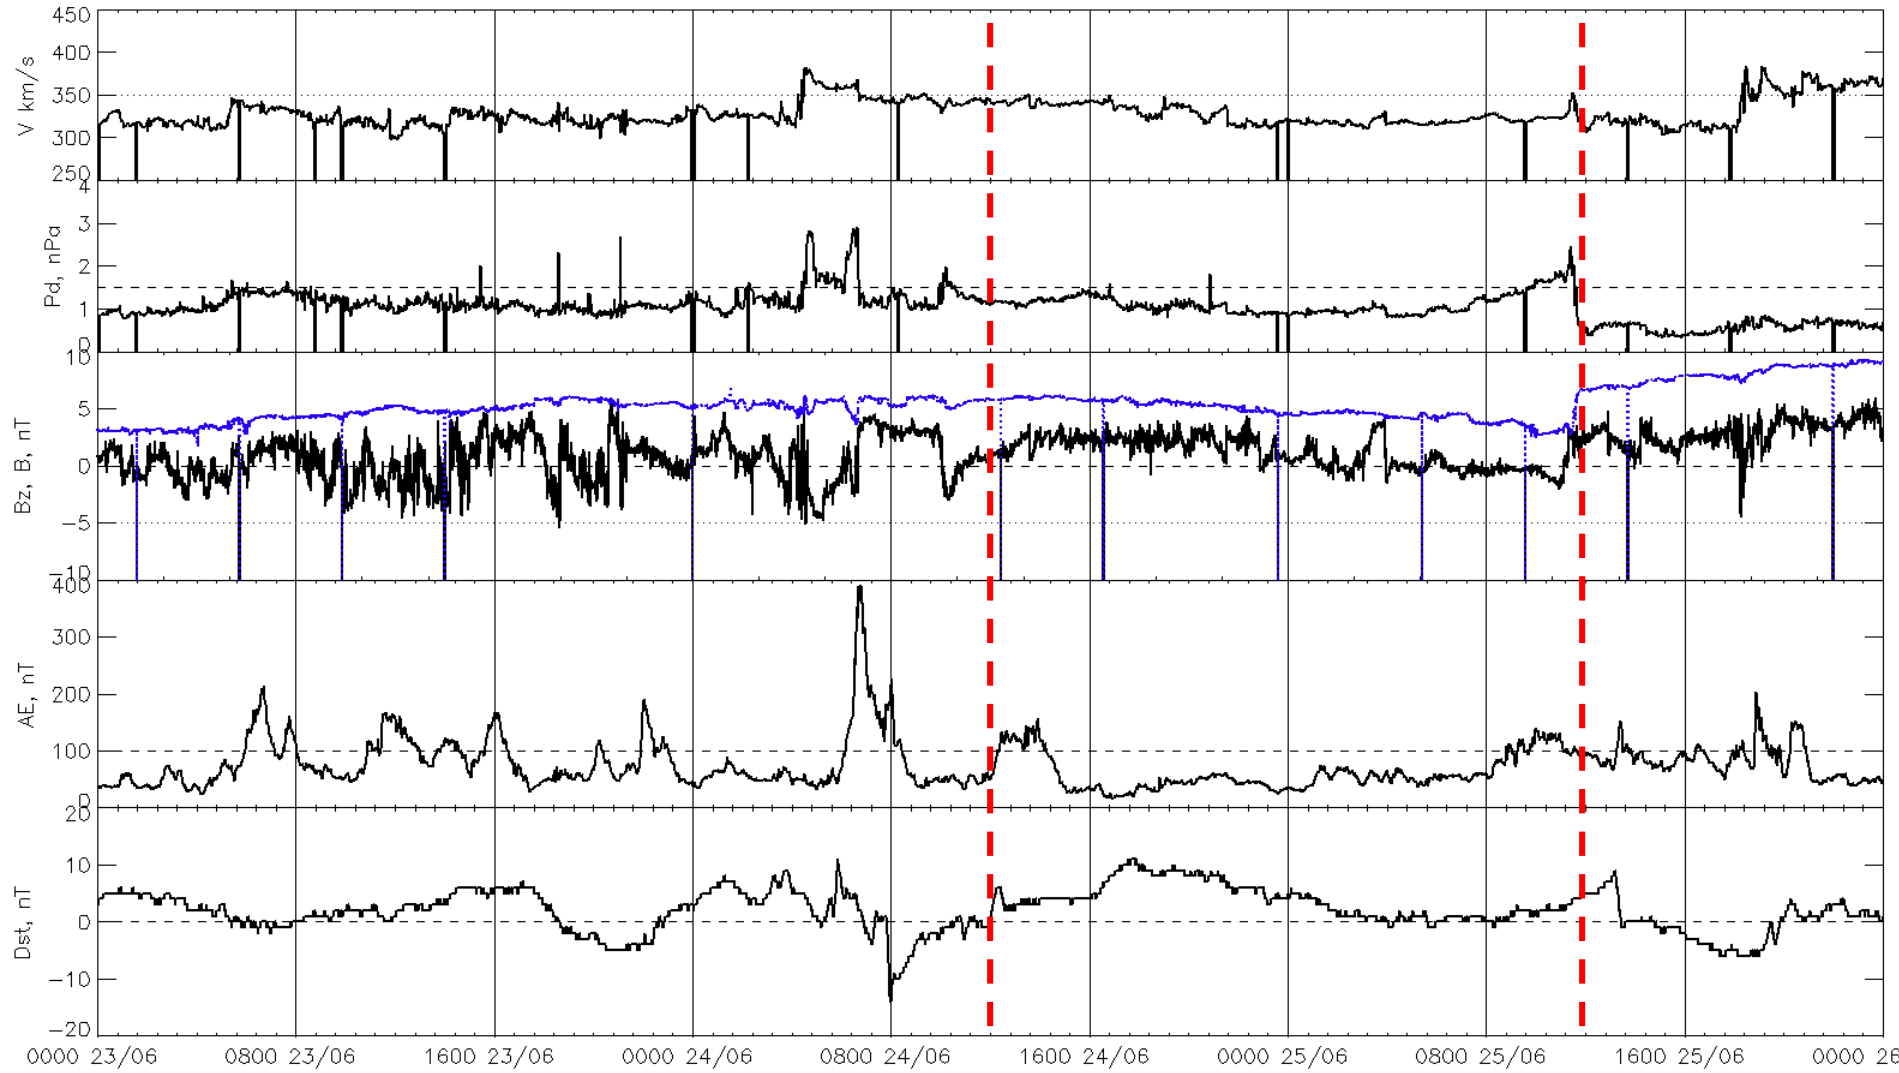

W1050620

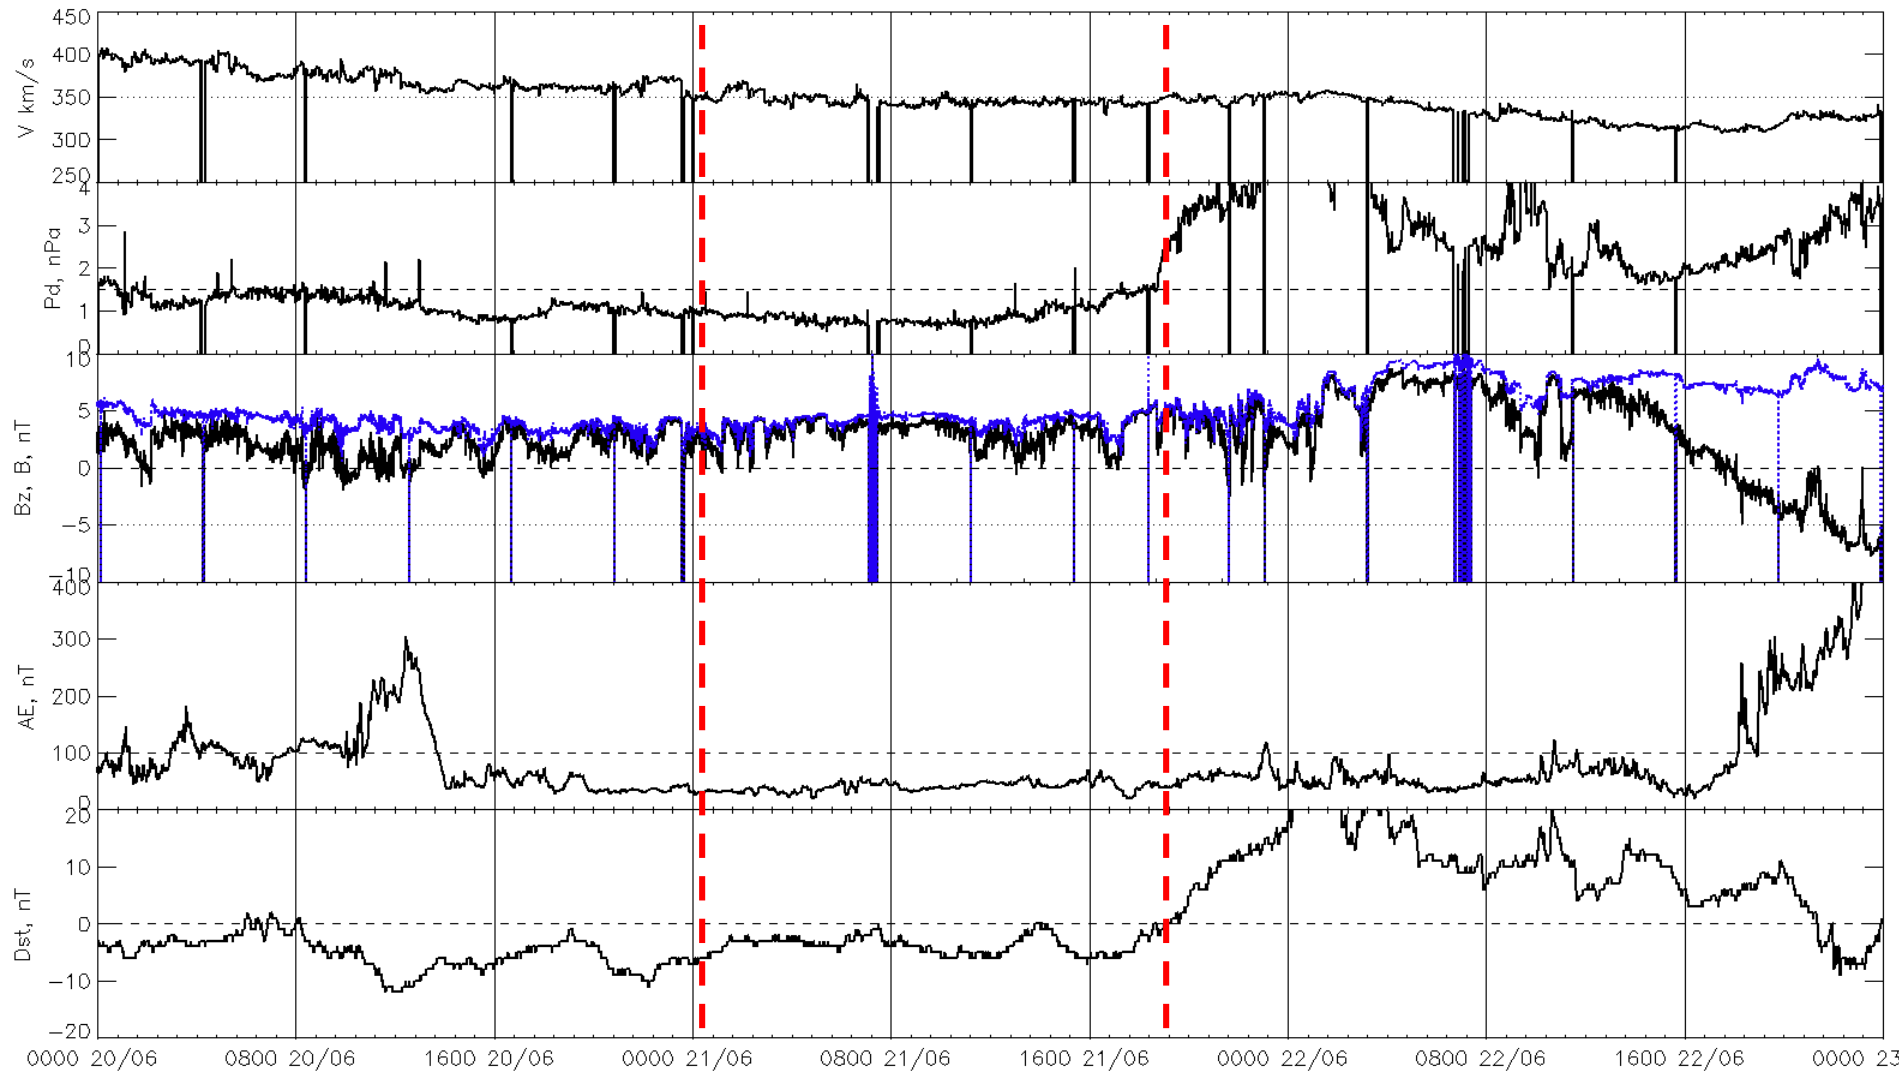

W1060622

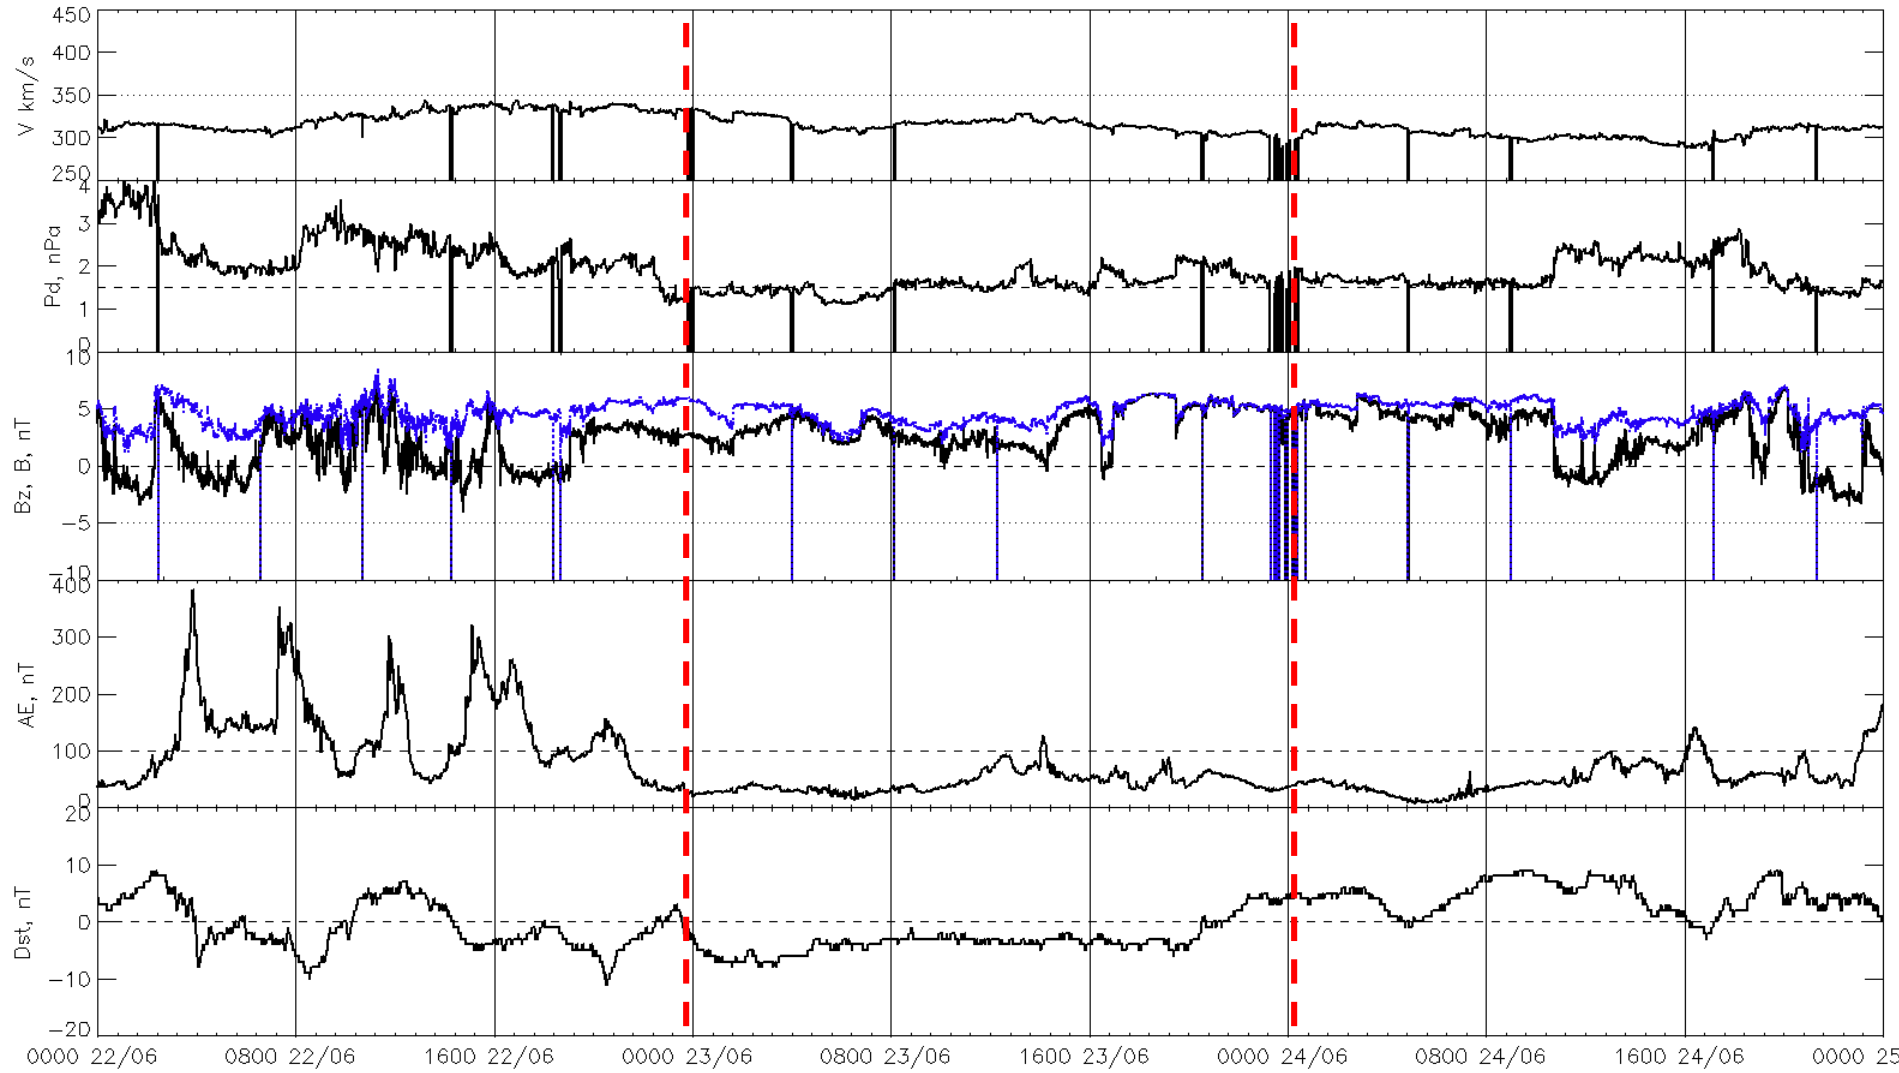



W1080612

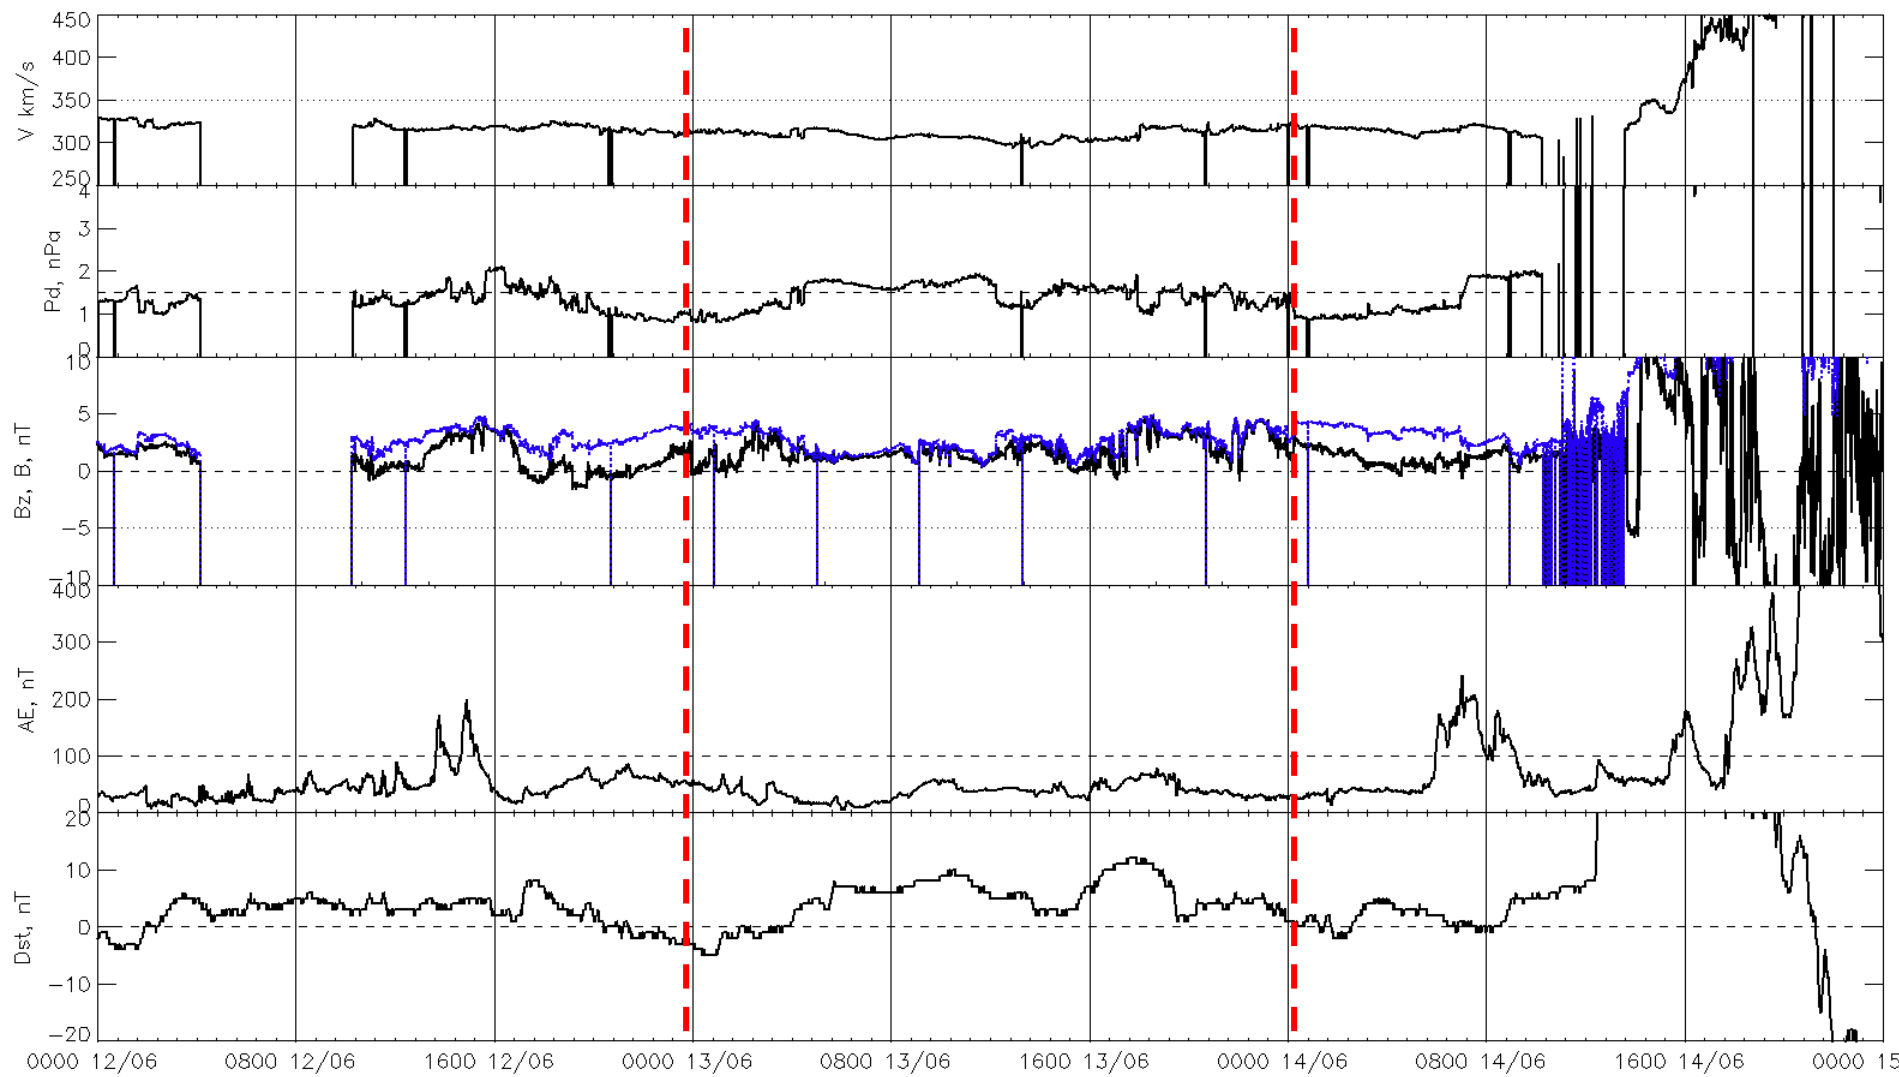

W1090616

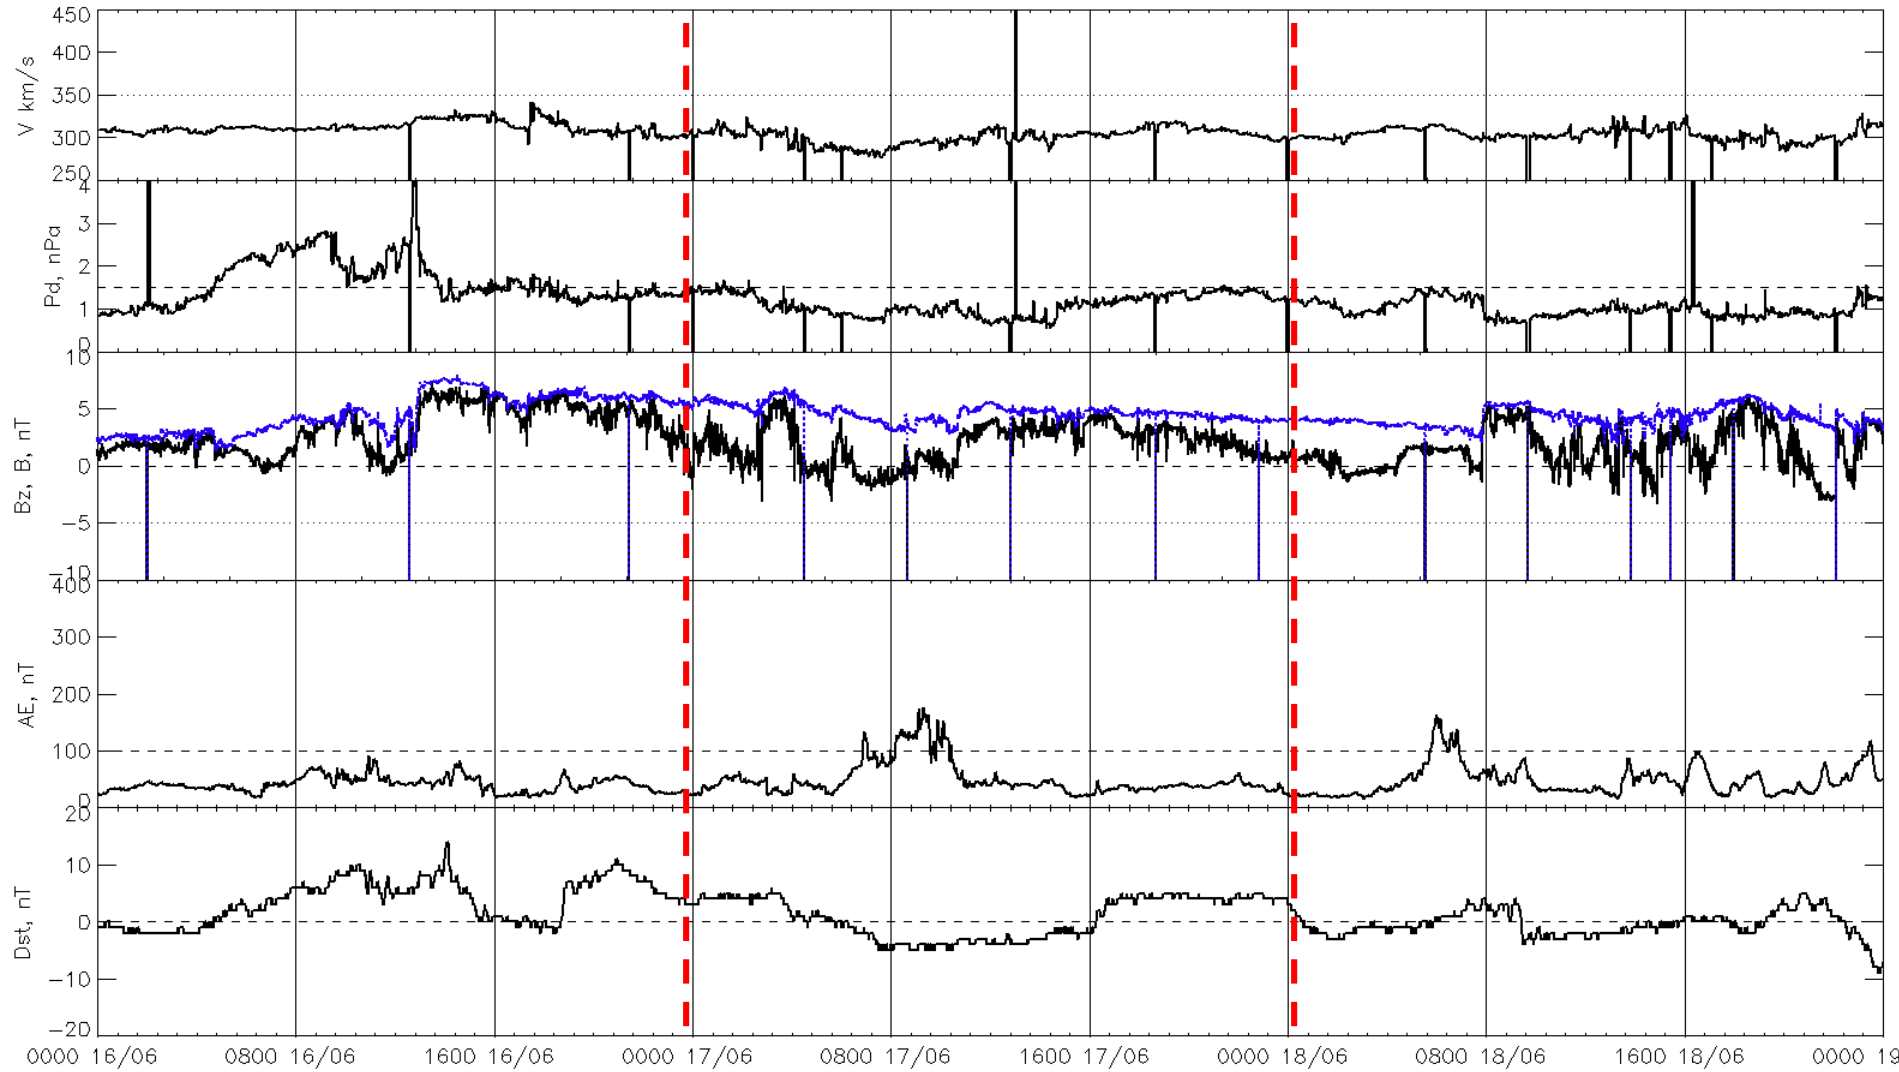

WI100611

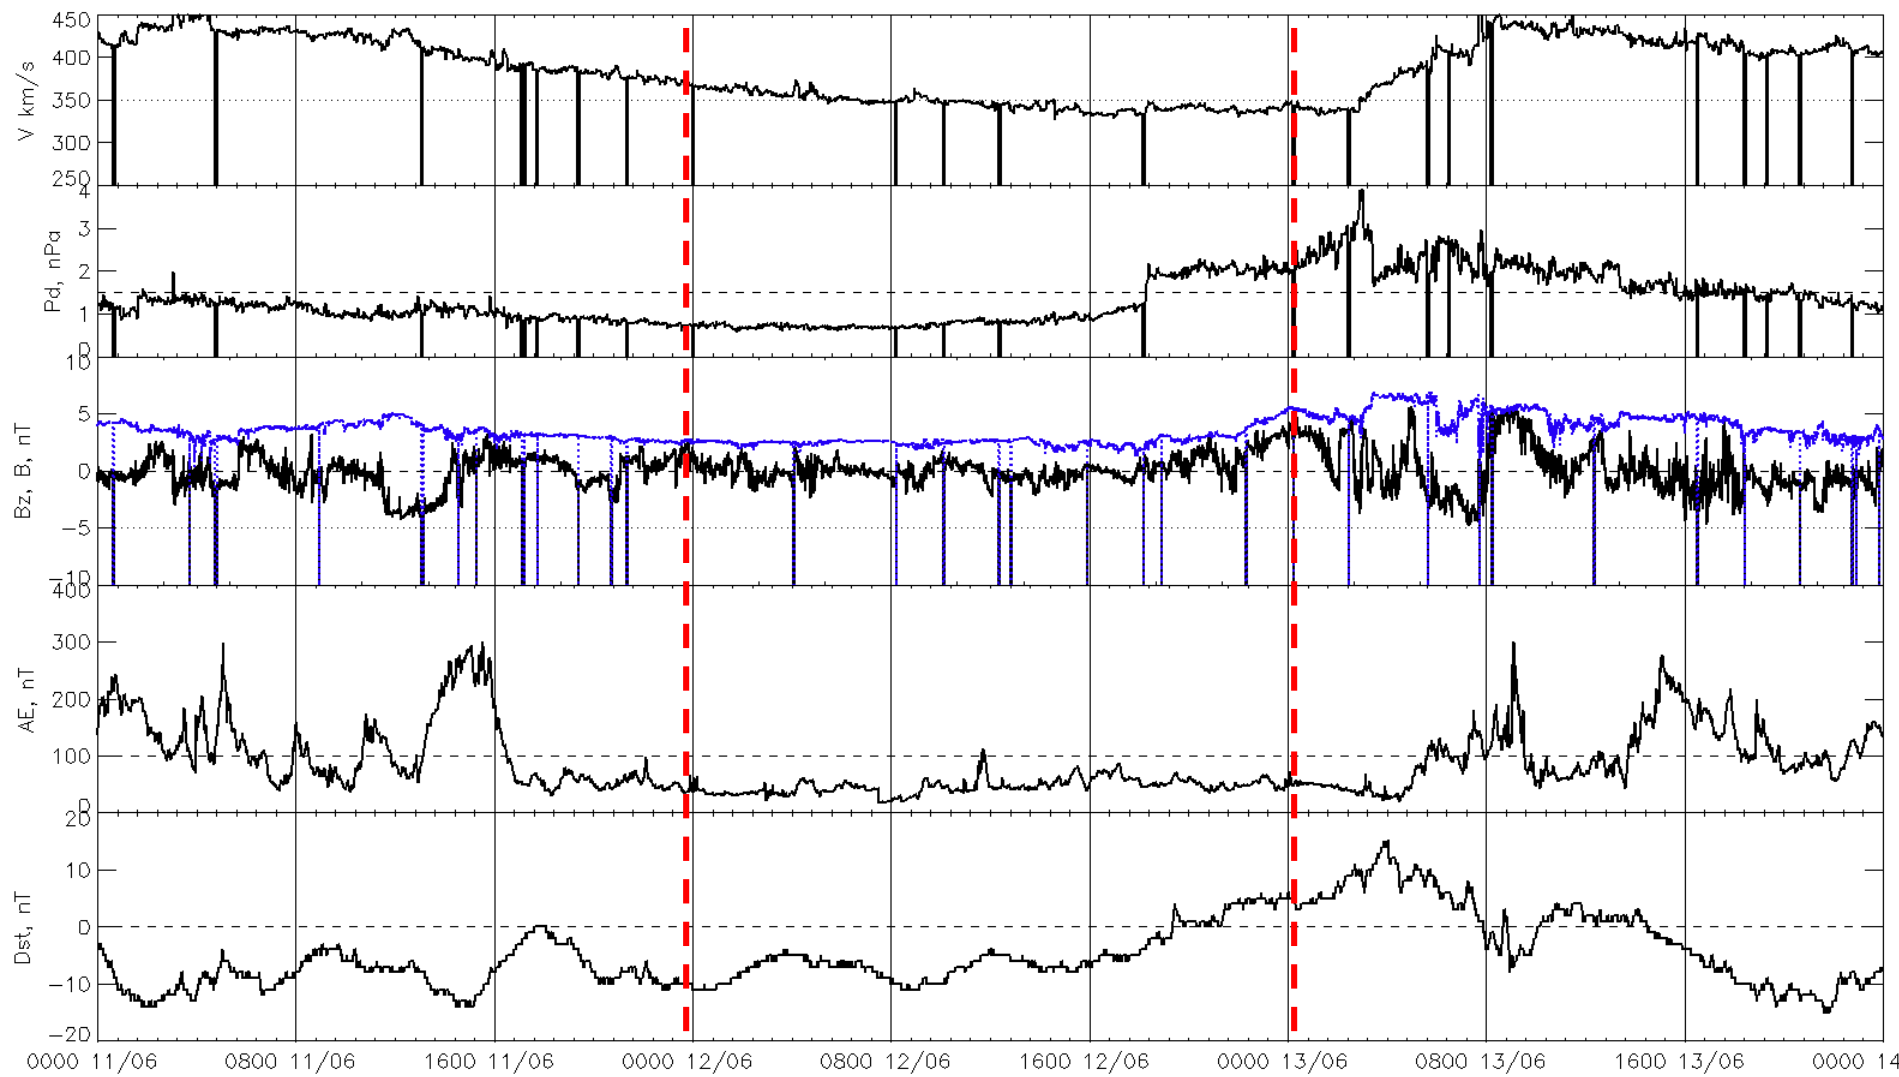

W110627

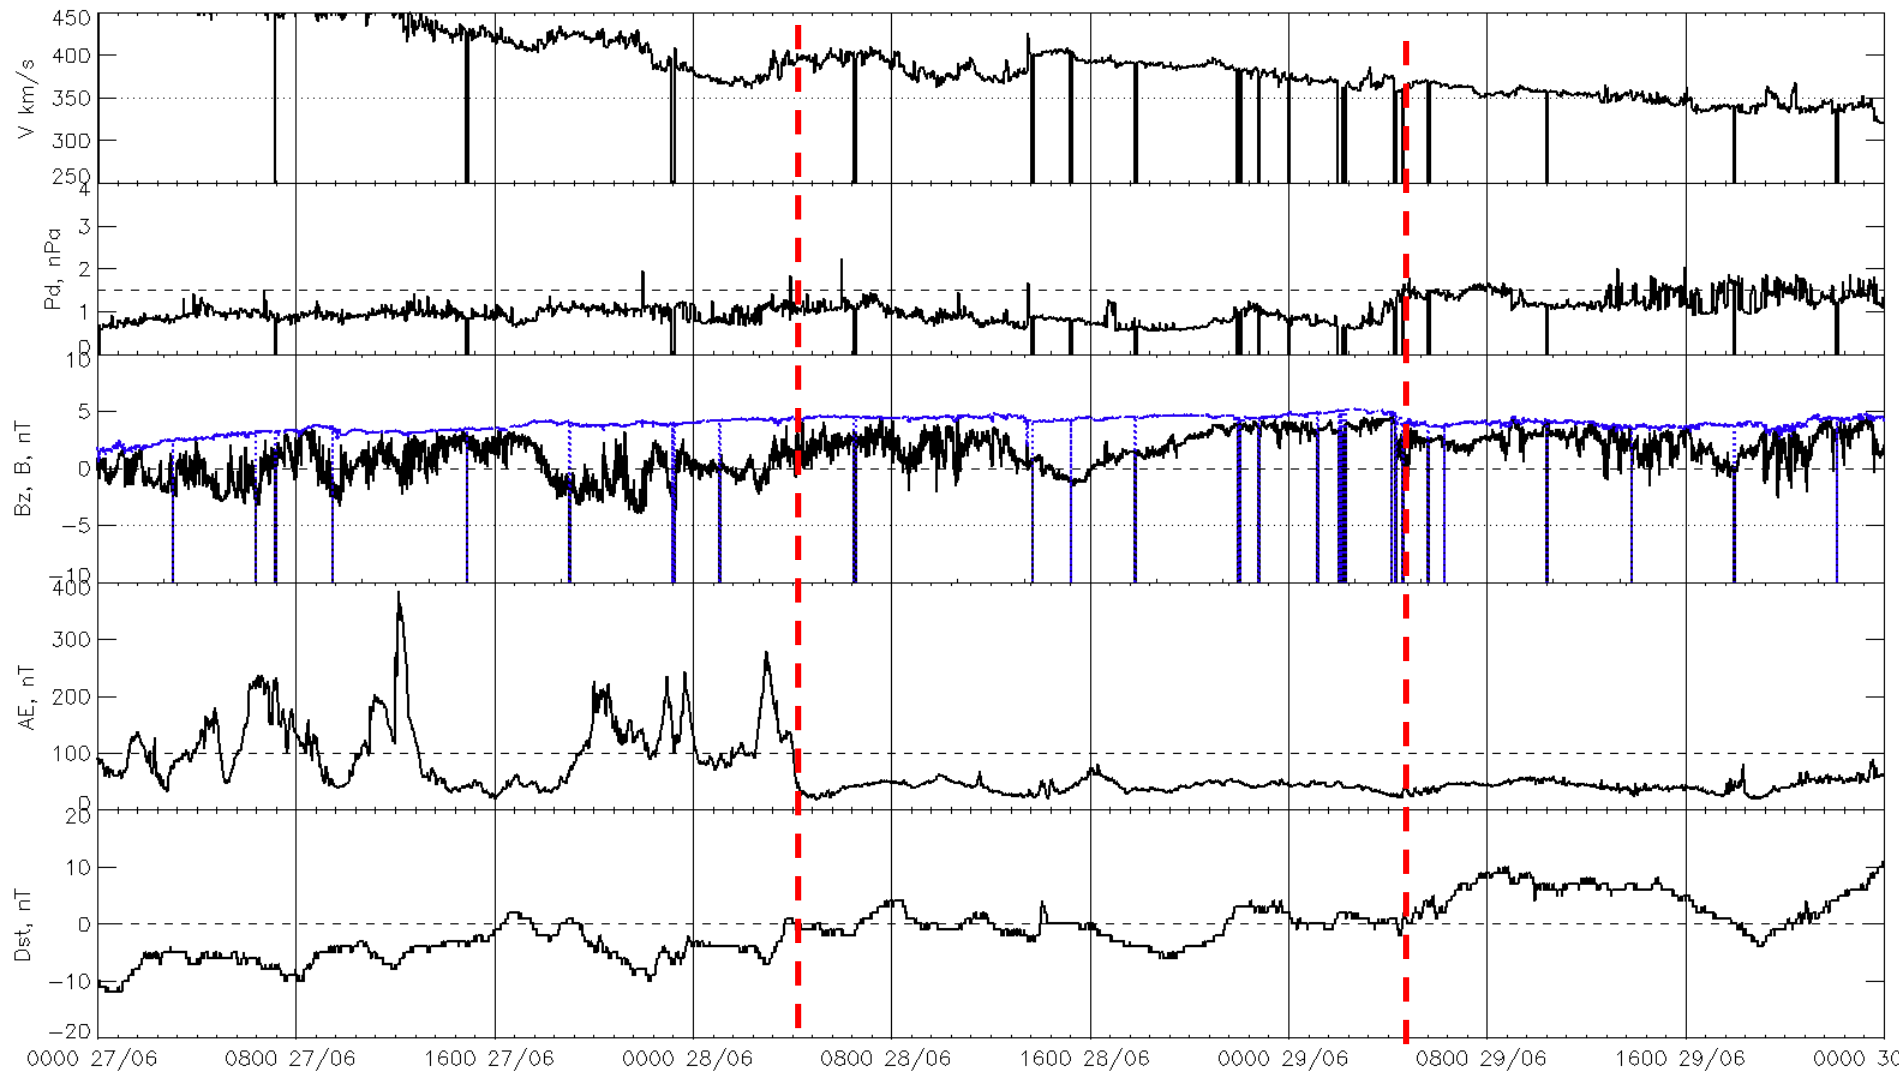

WI120614

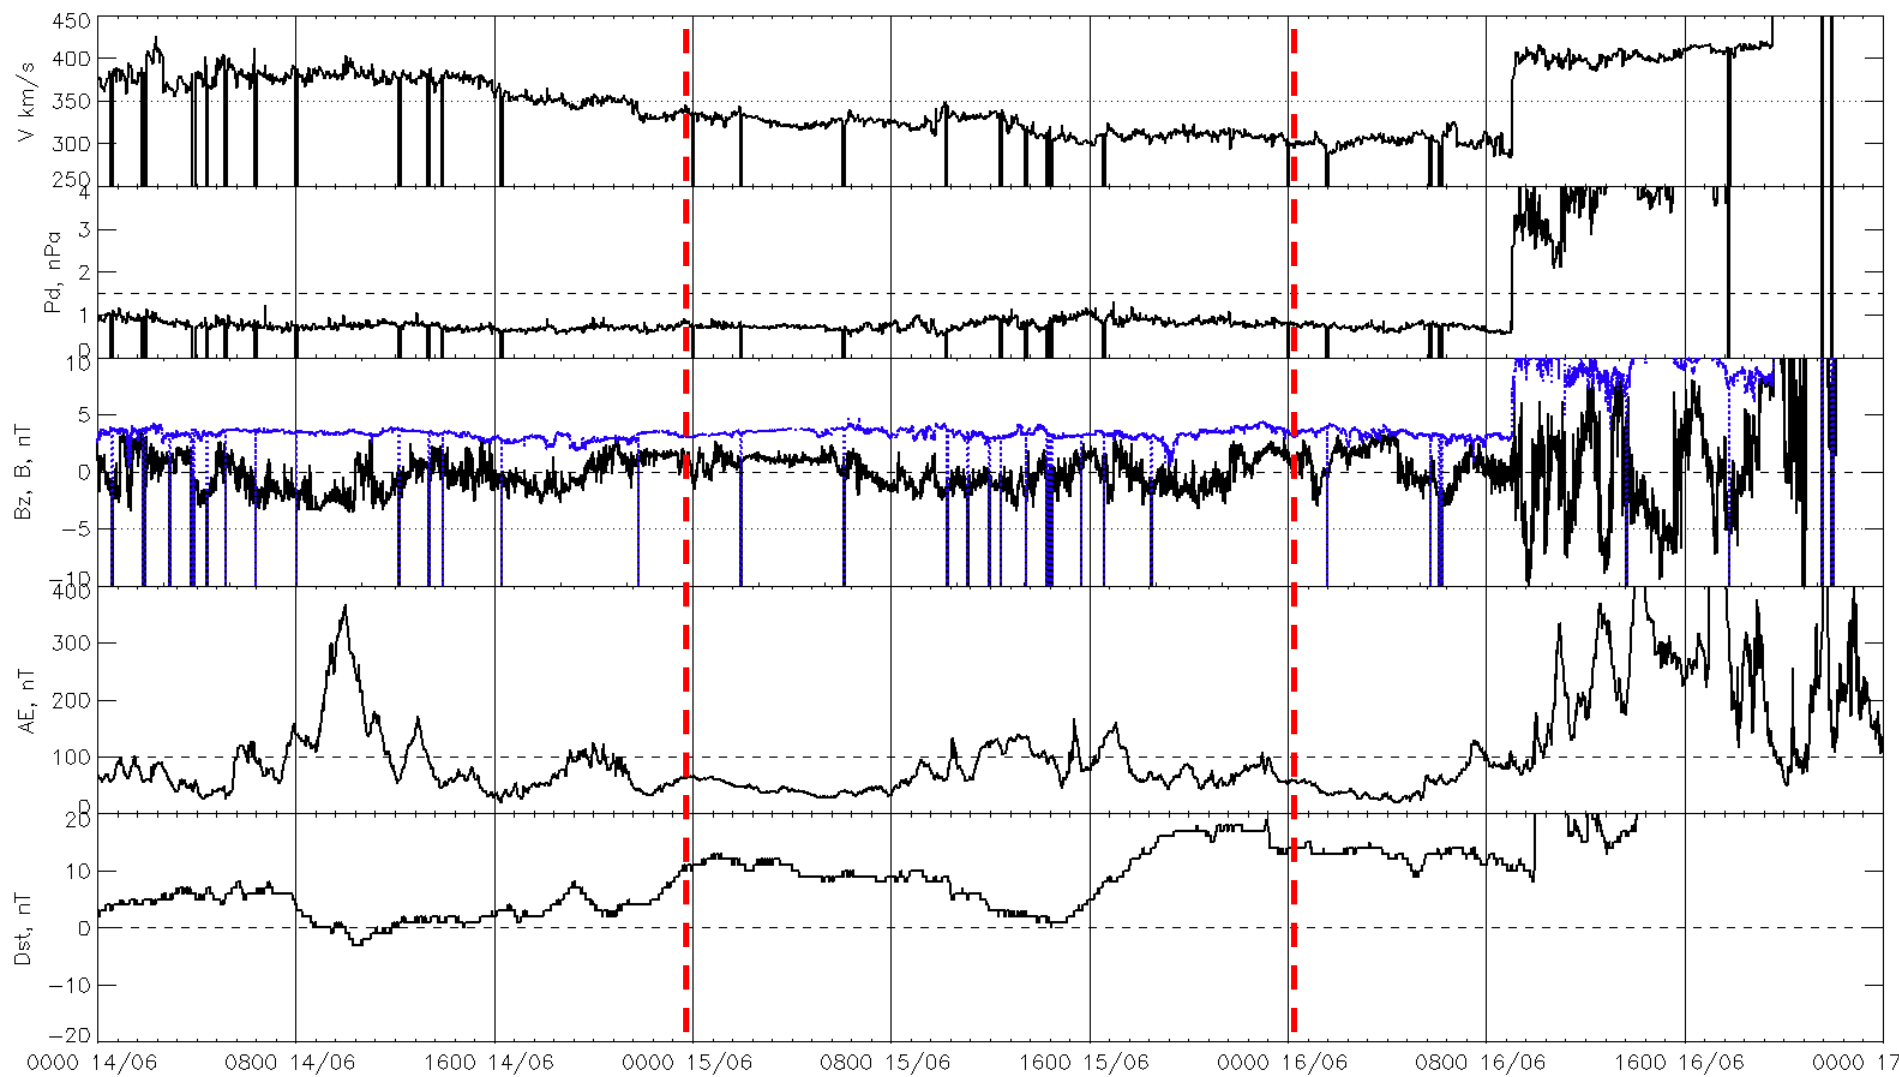

W1130615

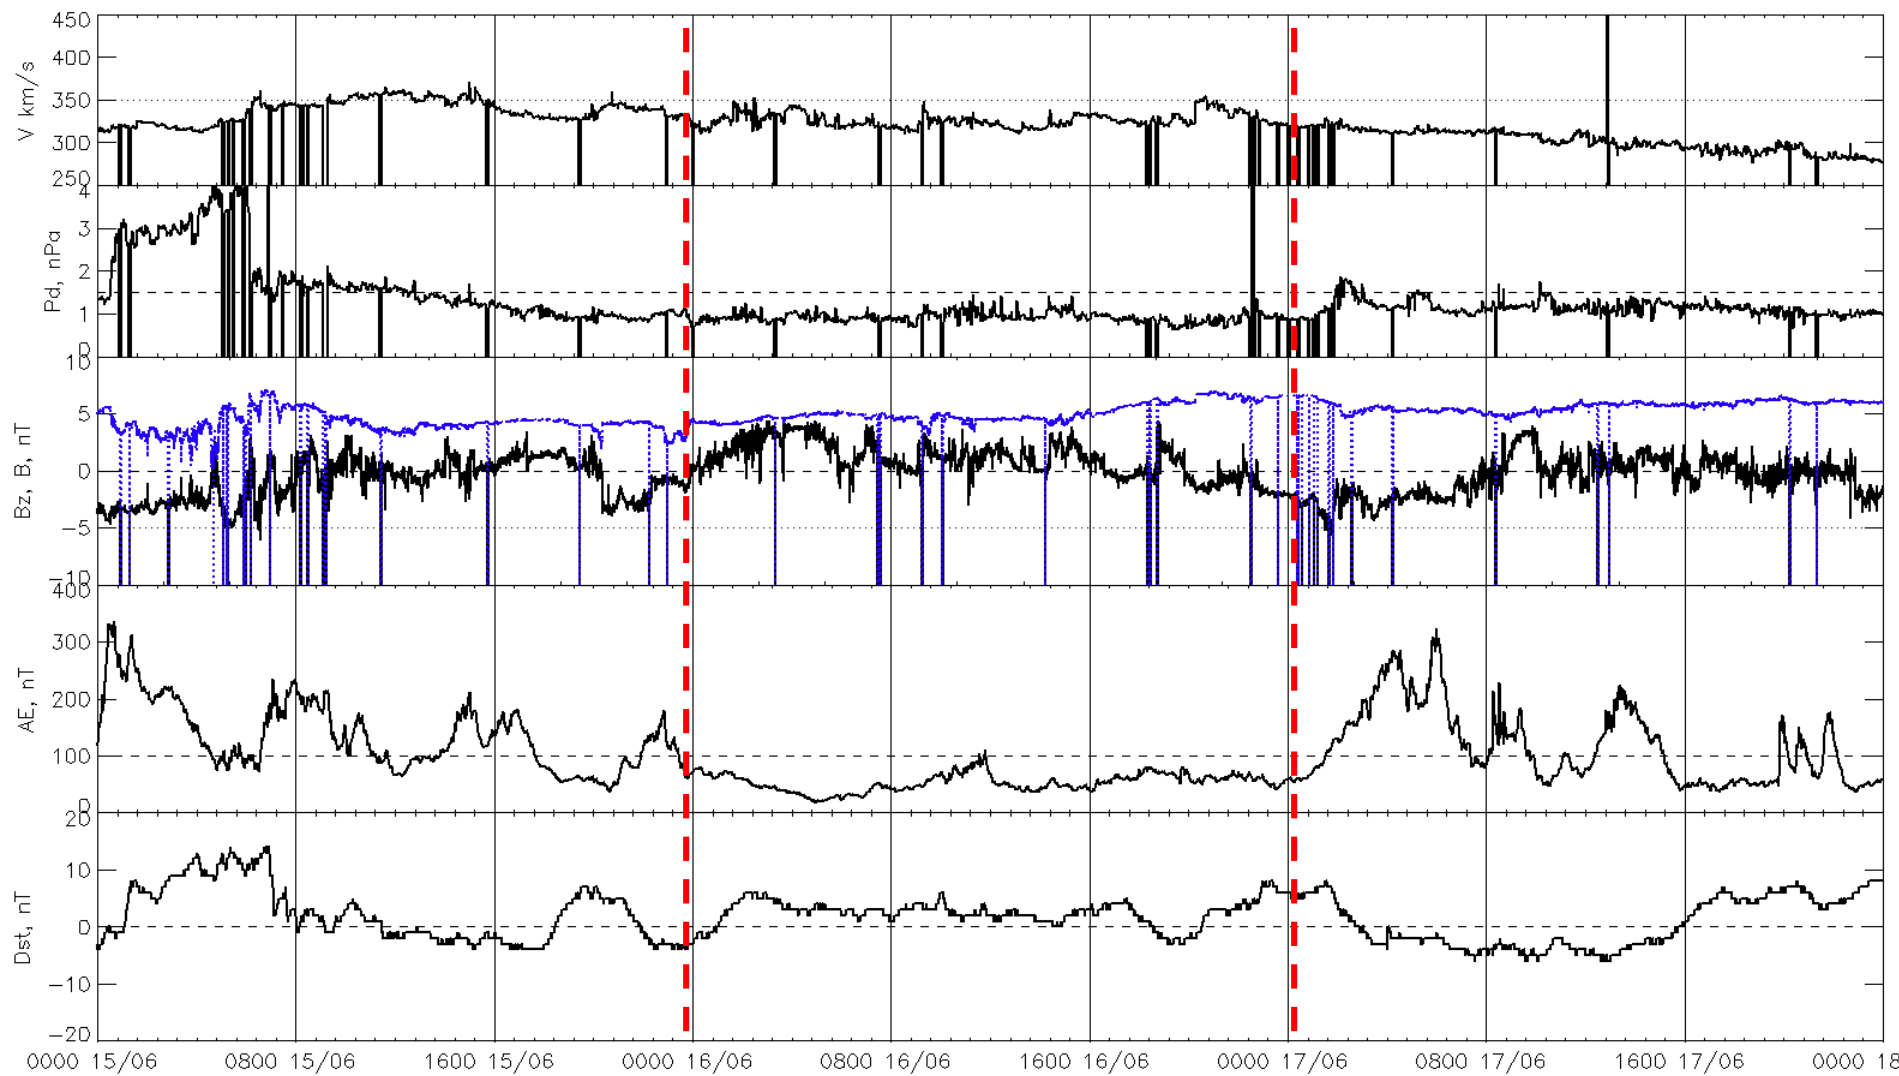

WI140531

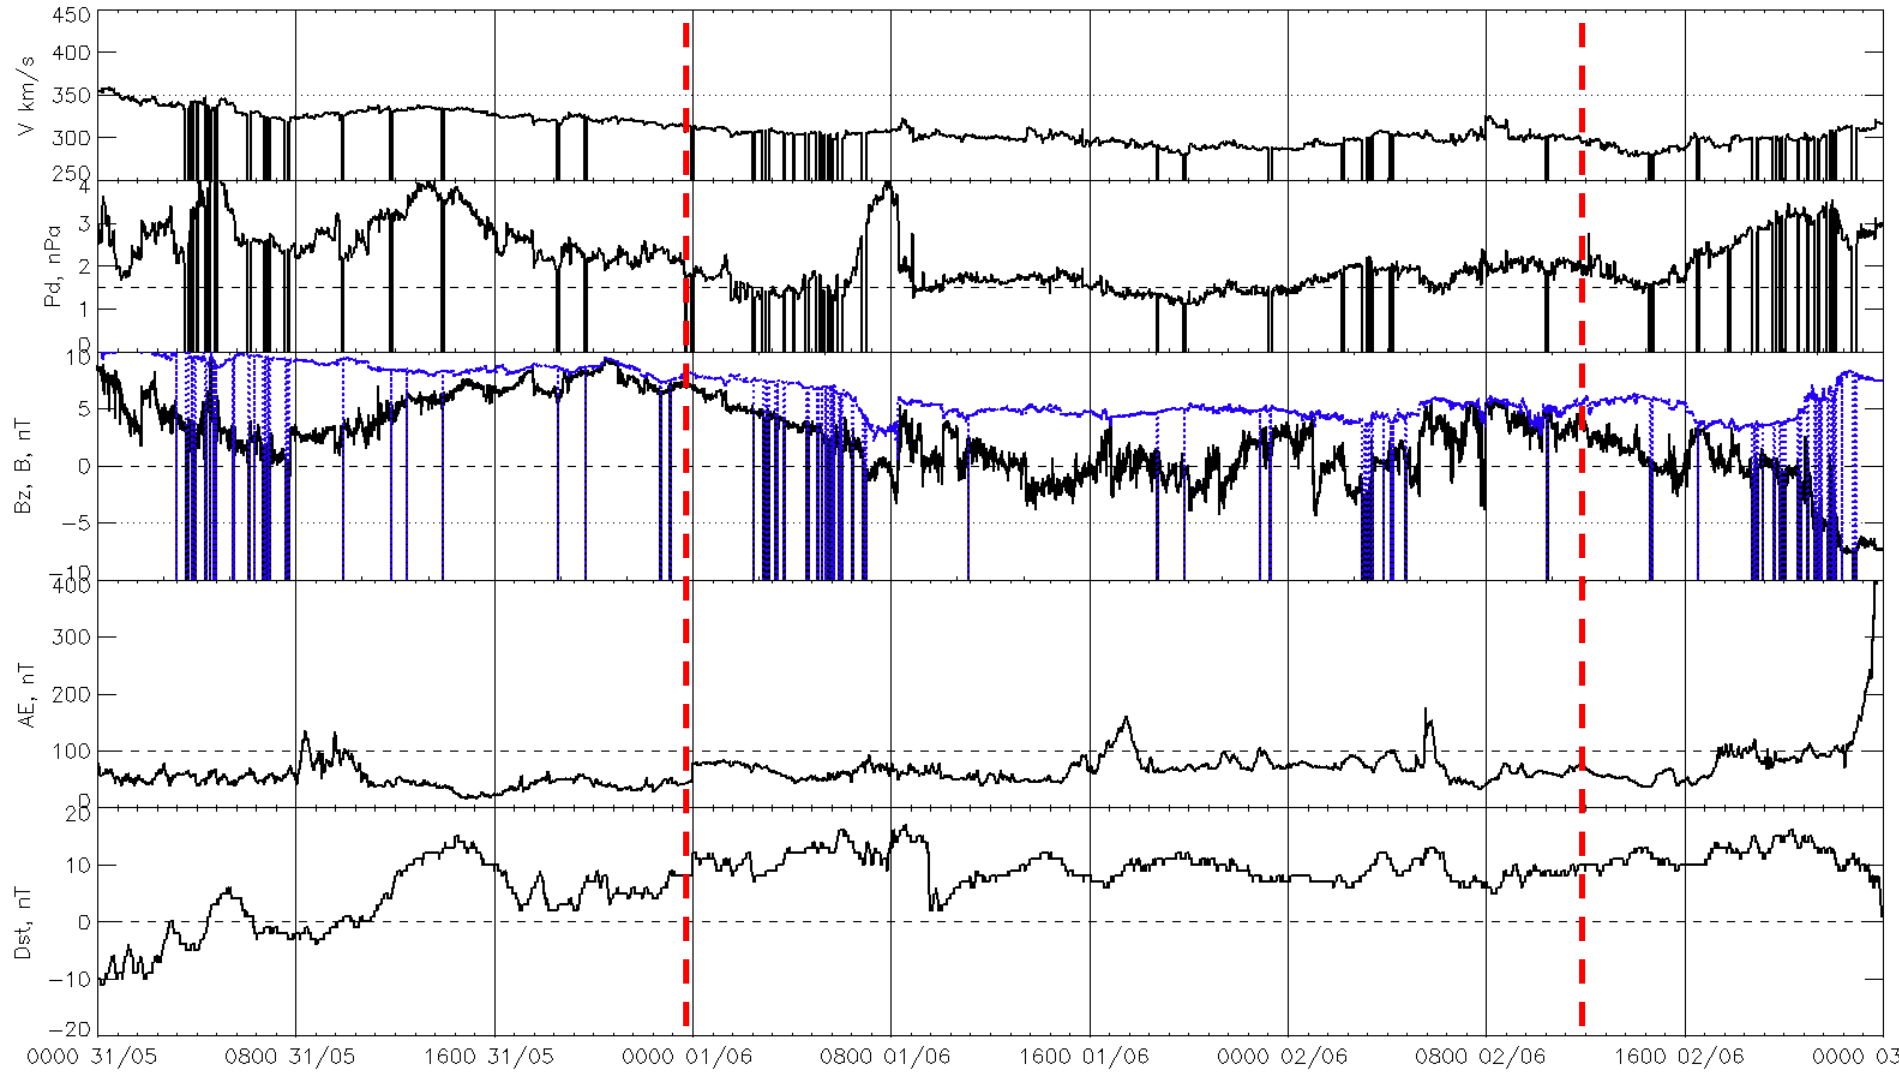

WI150603

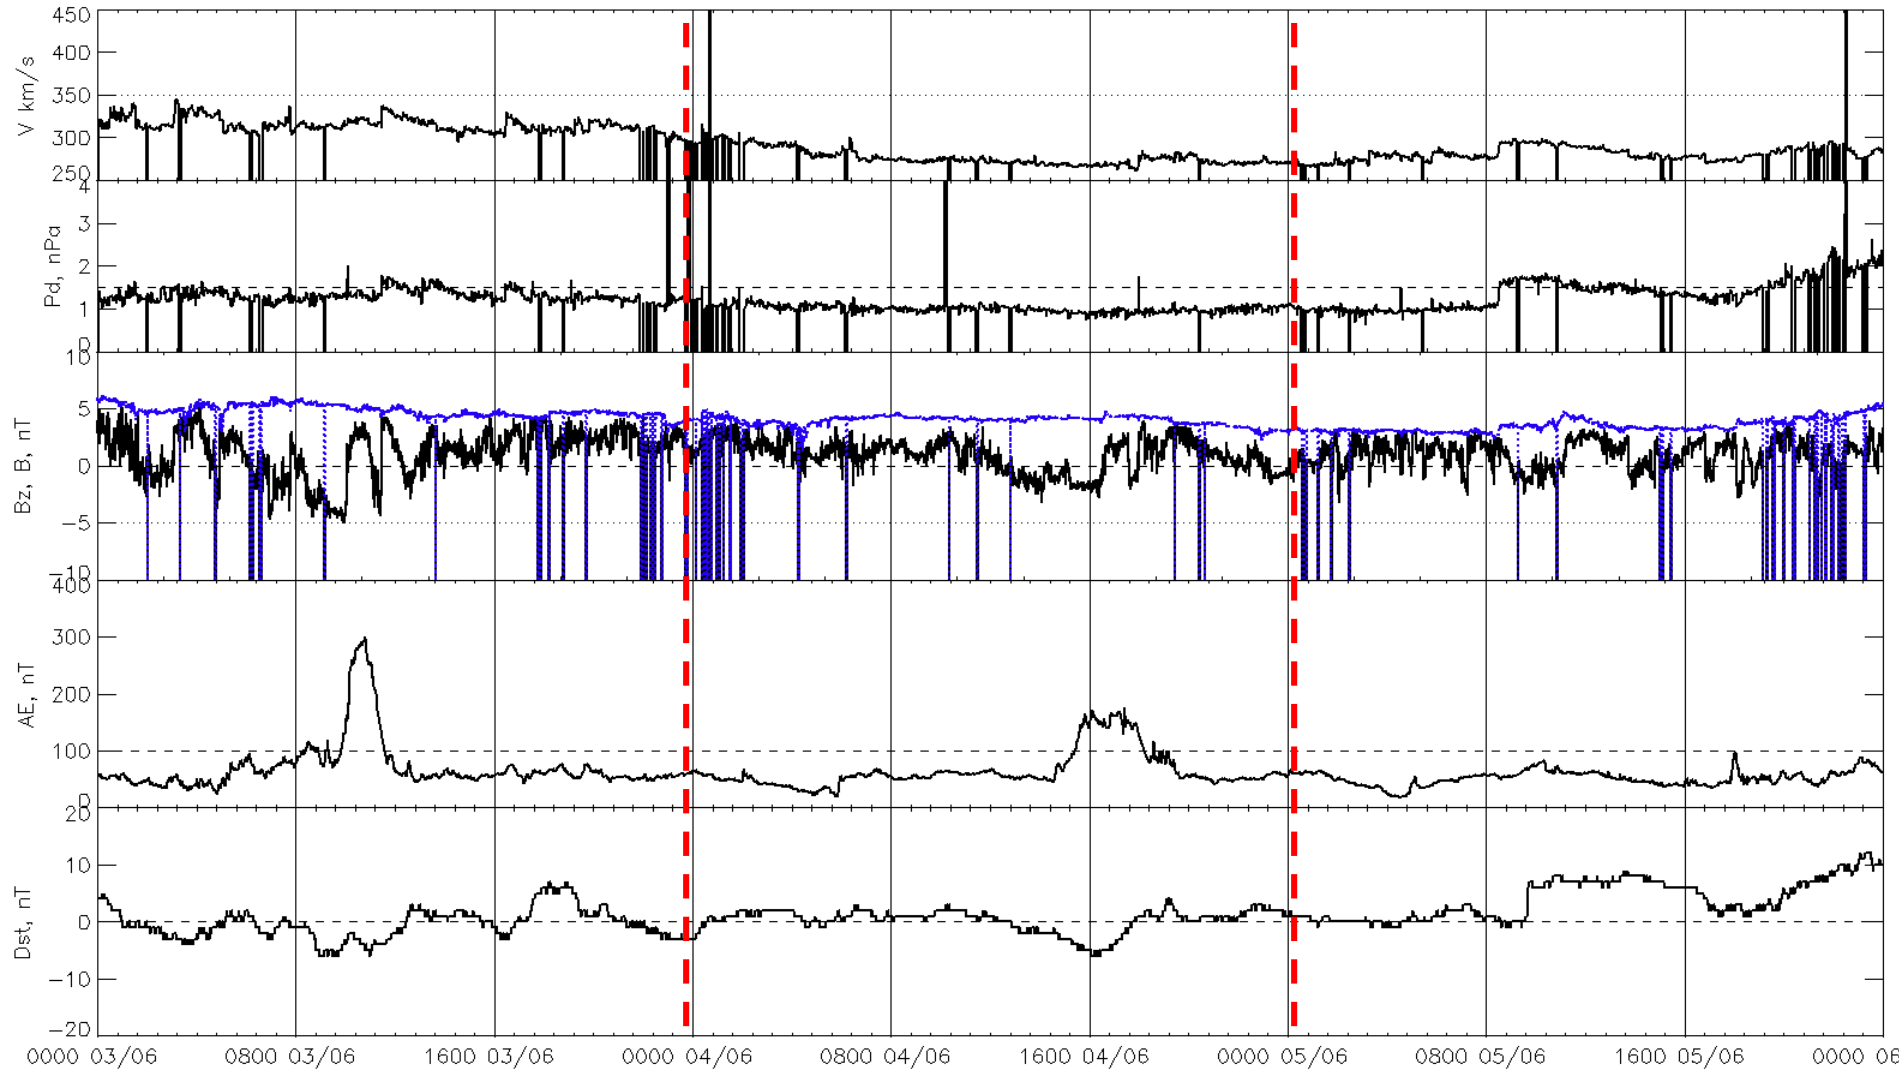



WI160602

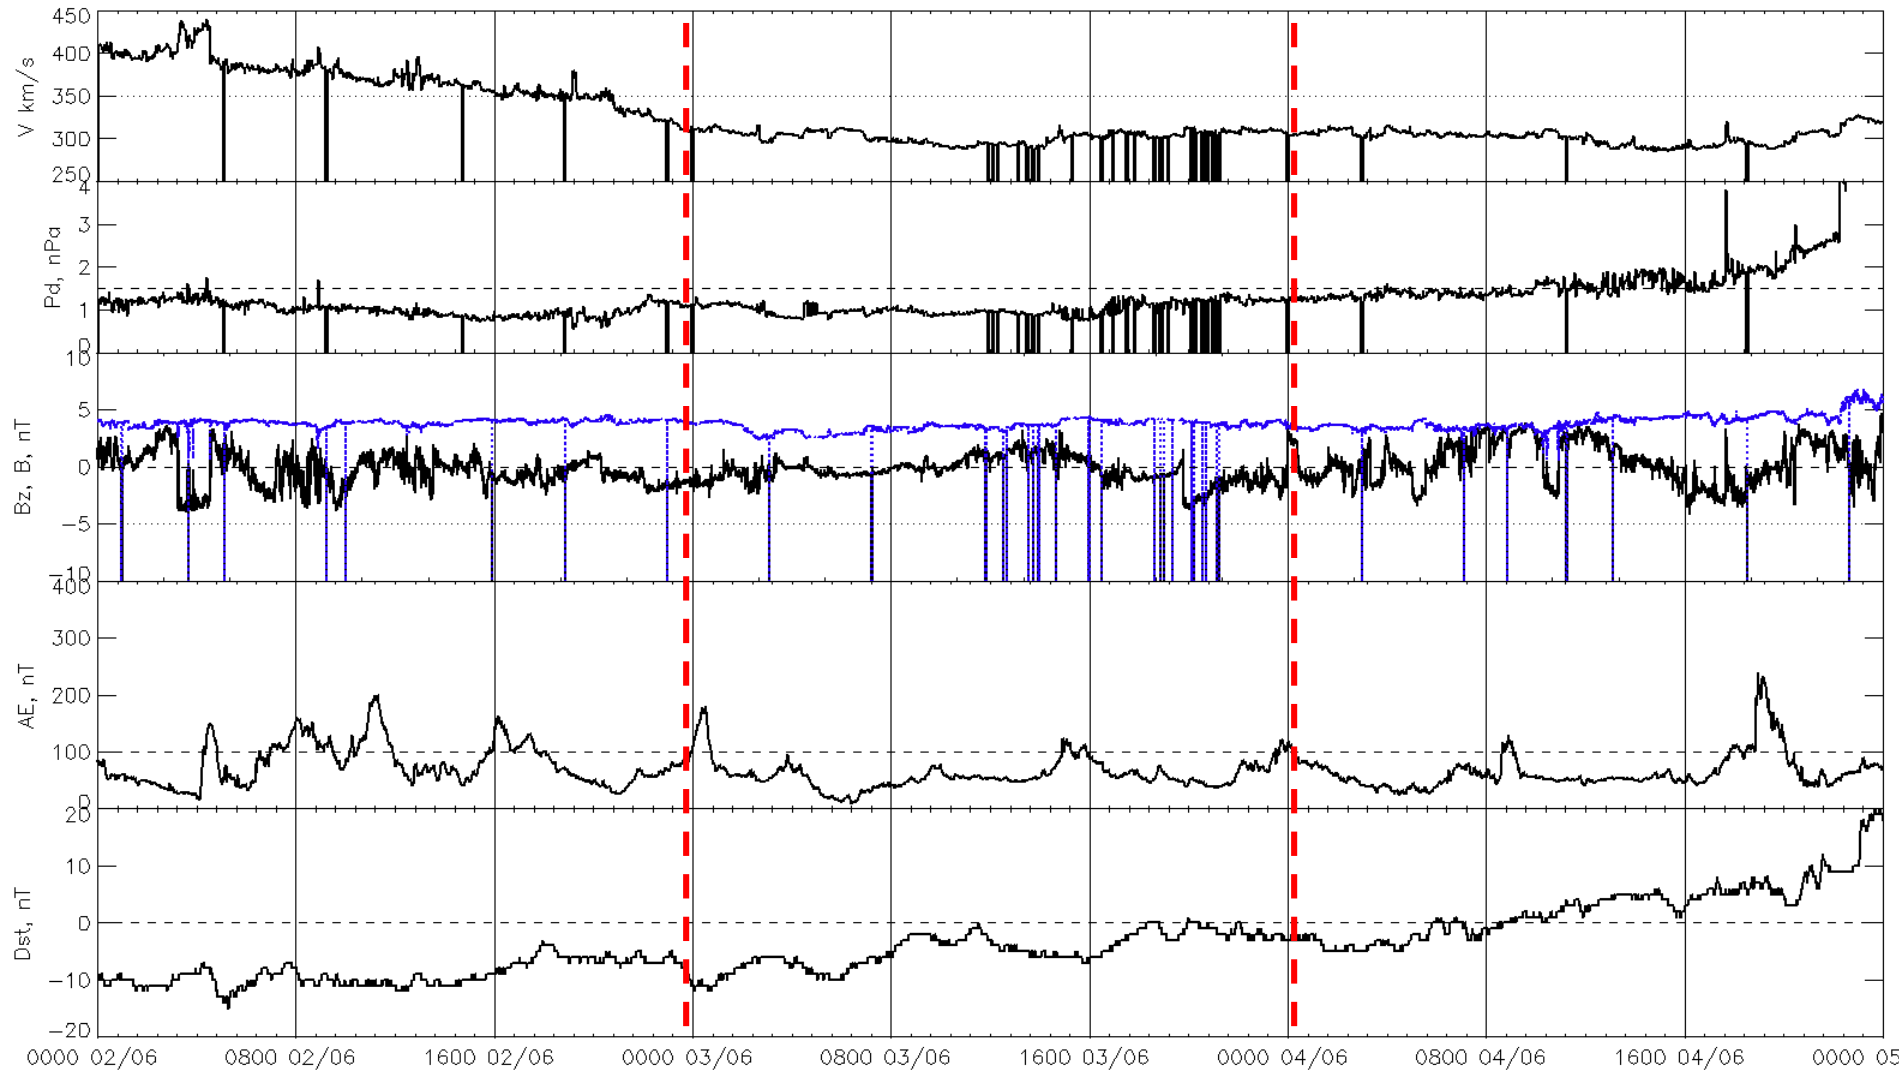

W1170608

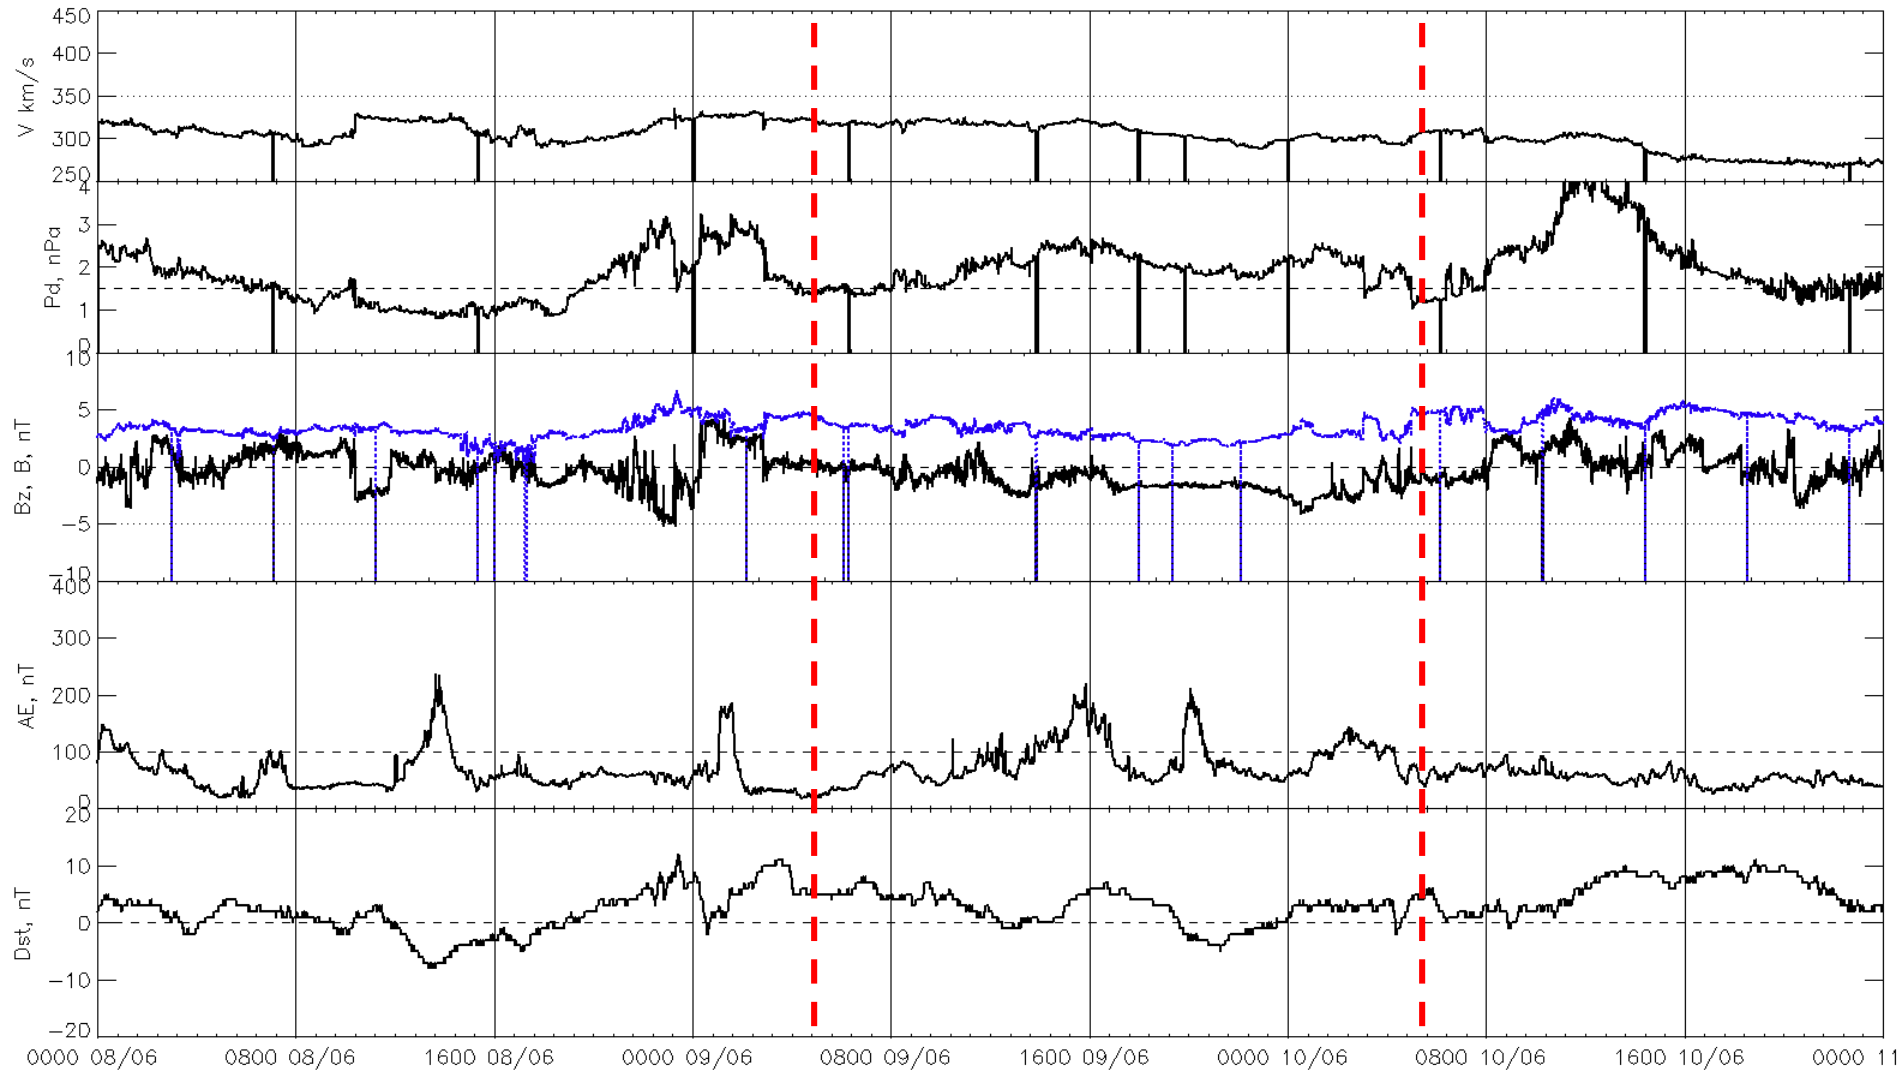

W180611

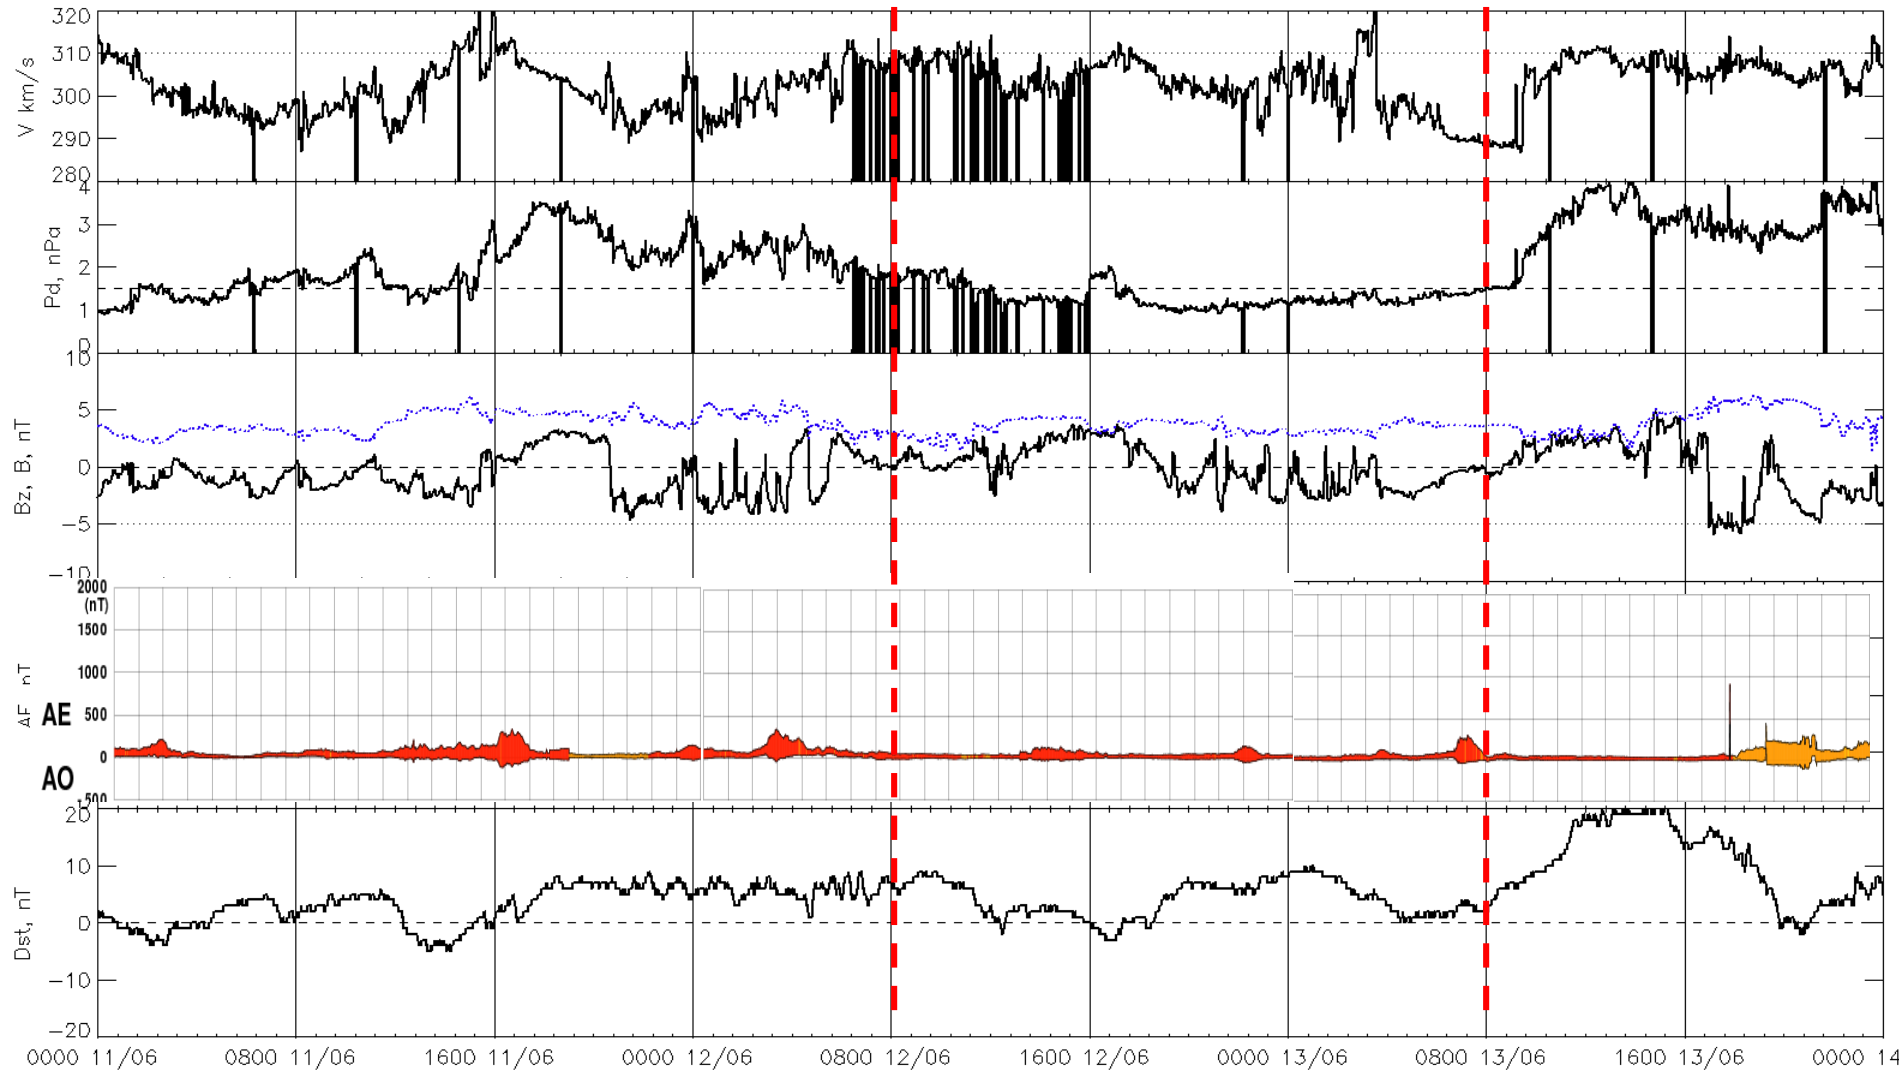

POES  $e > 30$  keV PA=90 avr 2001/08/29 0h - dt=24h

min/max: 1.0E+000/1.0E+005

POES\_mapGsum\_05

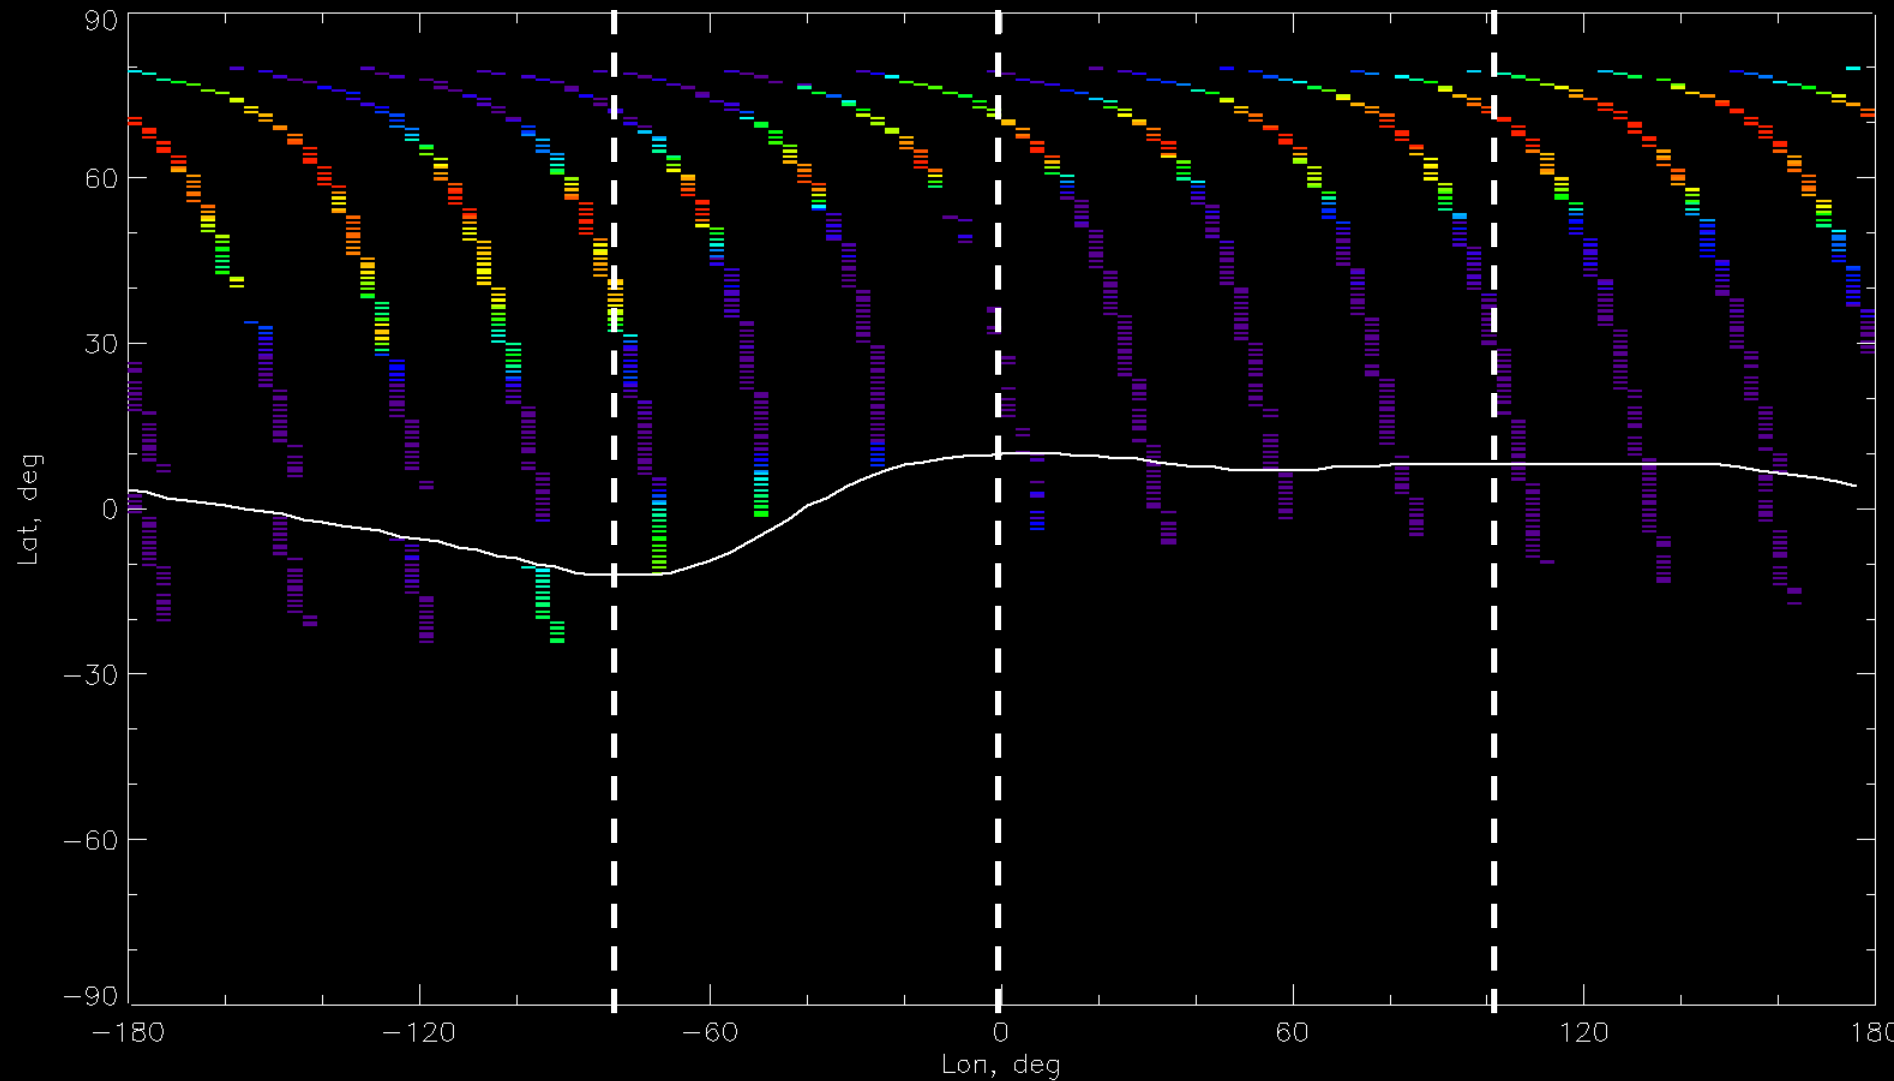

POES  $e > 30$  keV PA=90 avr 2002/08/28 0h - dt=24h

min/max: 1.0E+000/1.0E+005

POES\_mapGsum\_05

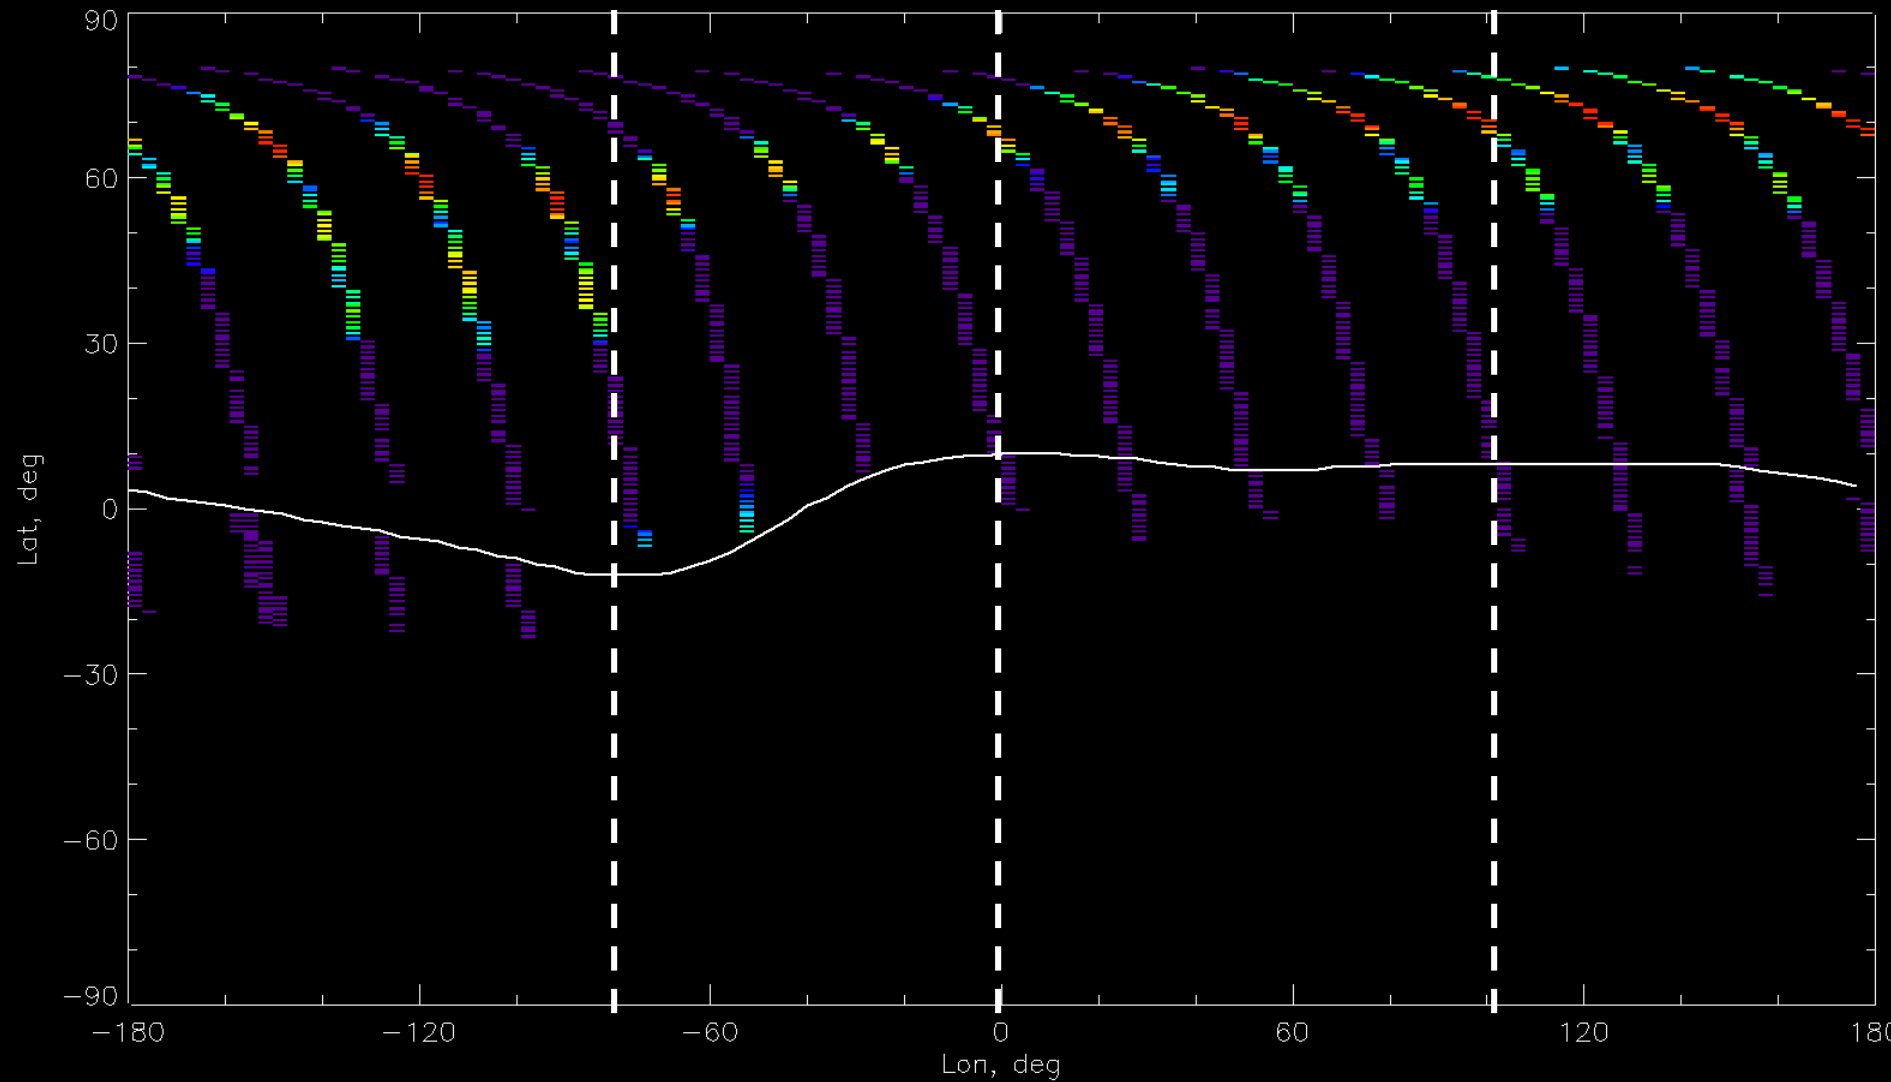

POES  $e > 30$  keV PA=90 avr 2004/08/24 12h - dt=24h

min/max: 1.0E+000/1.0E+005

POES\_mapGsum\_05

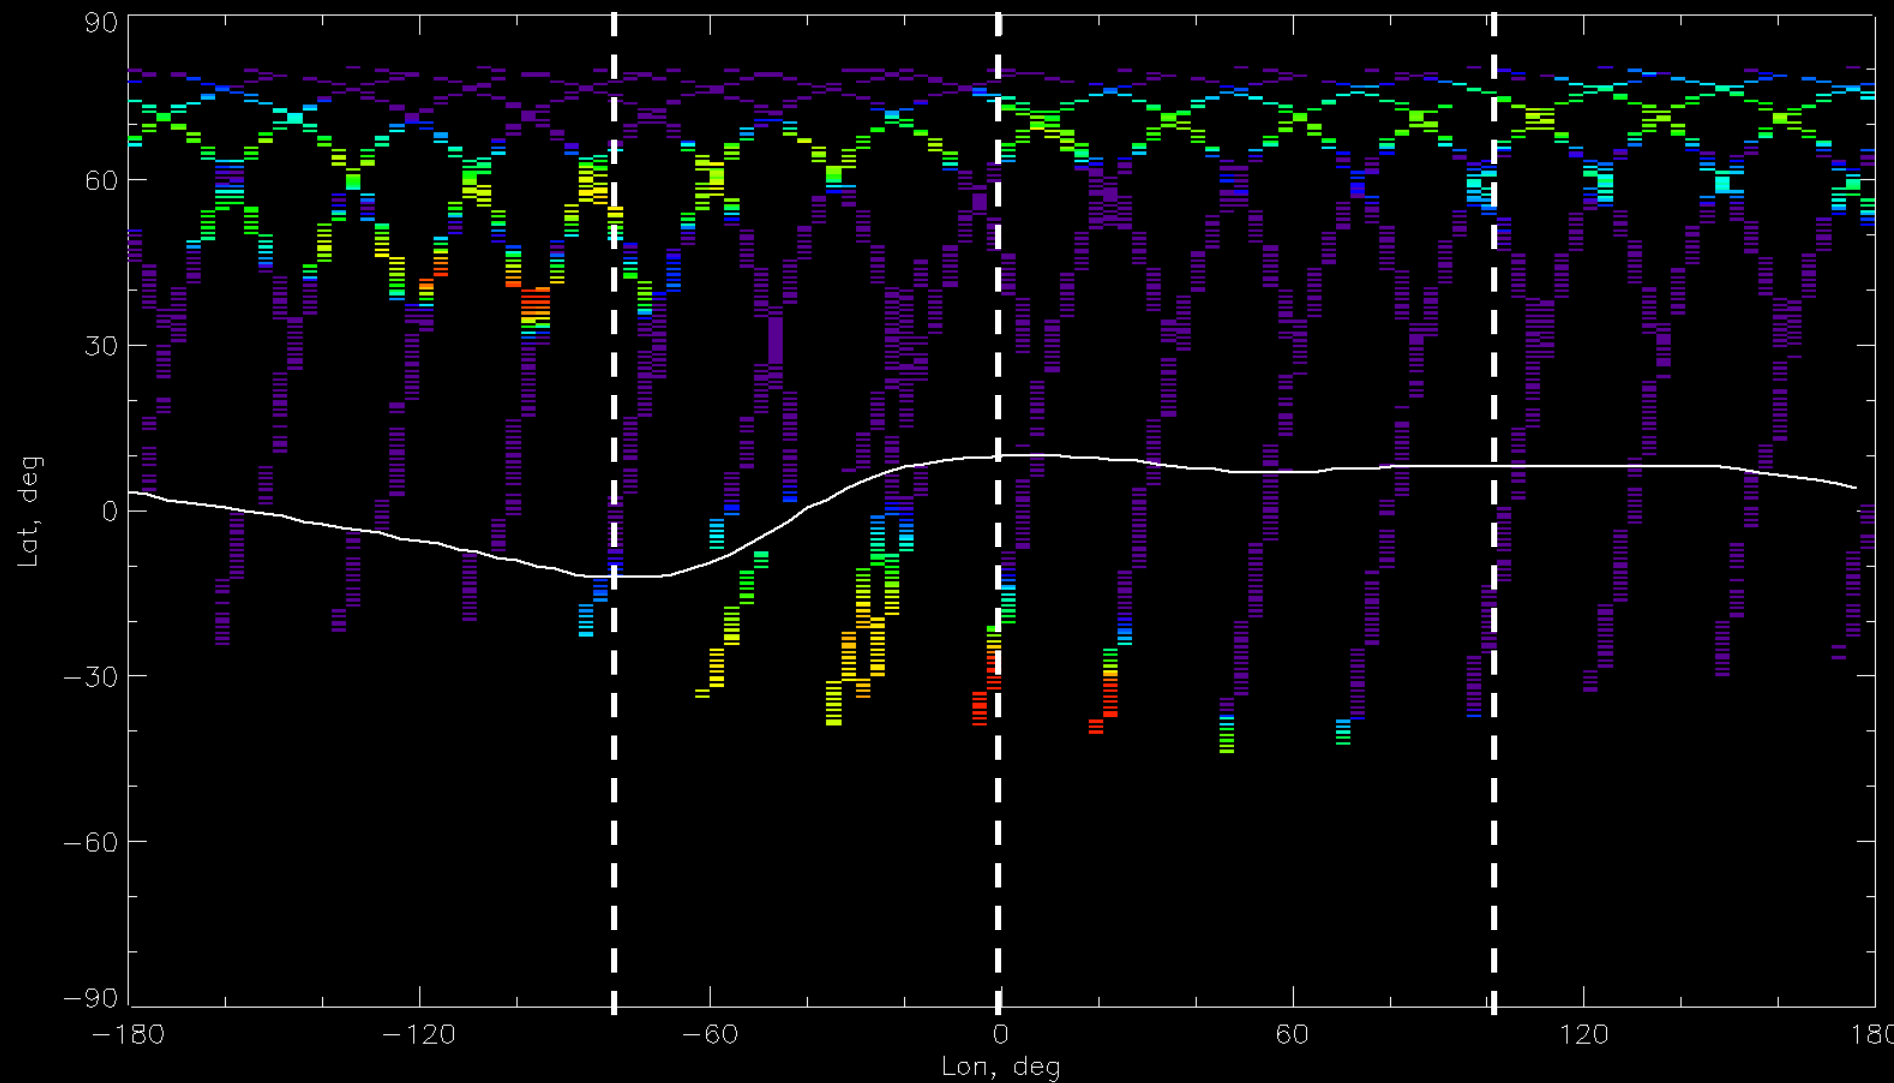

POES  $e > 30$  keV PA=90 avr 2005/08/21 0h - dt=18h

min/max: 1.0E+000/1.0E+005

POES\_mapGsum\_05

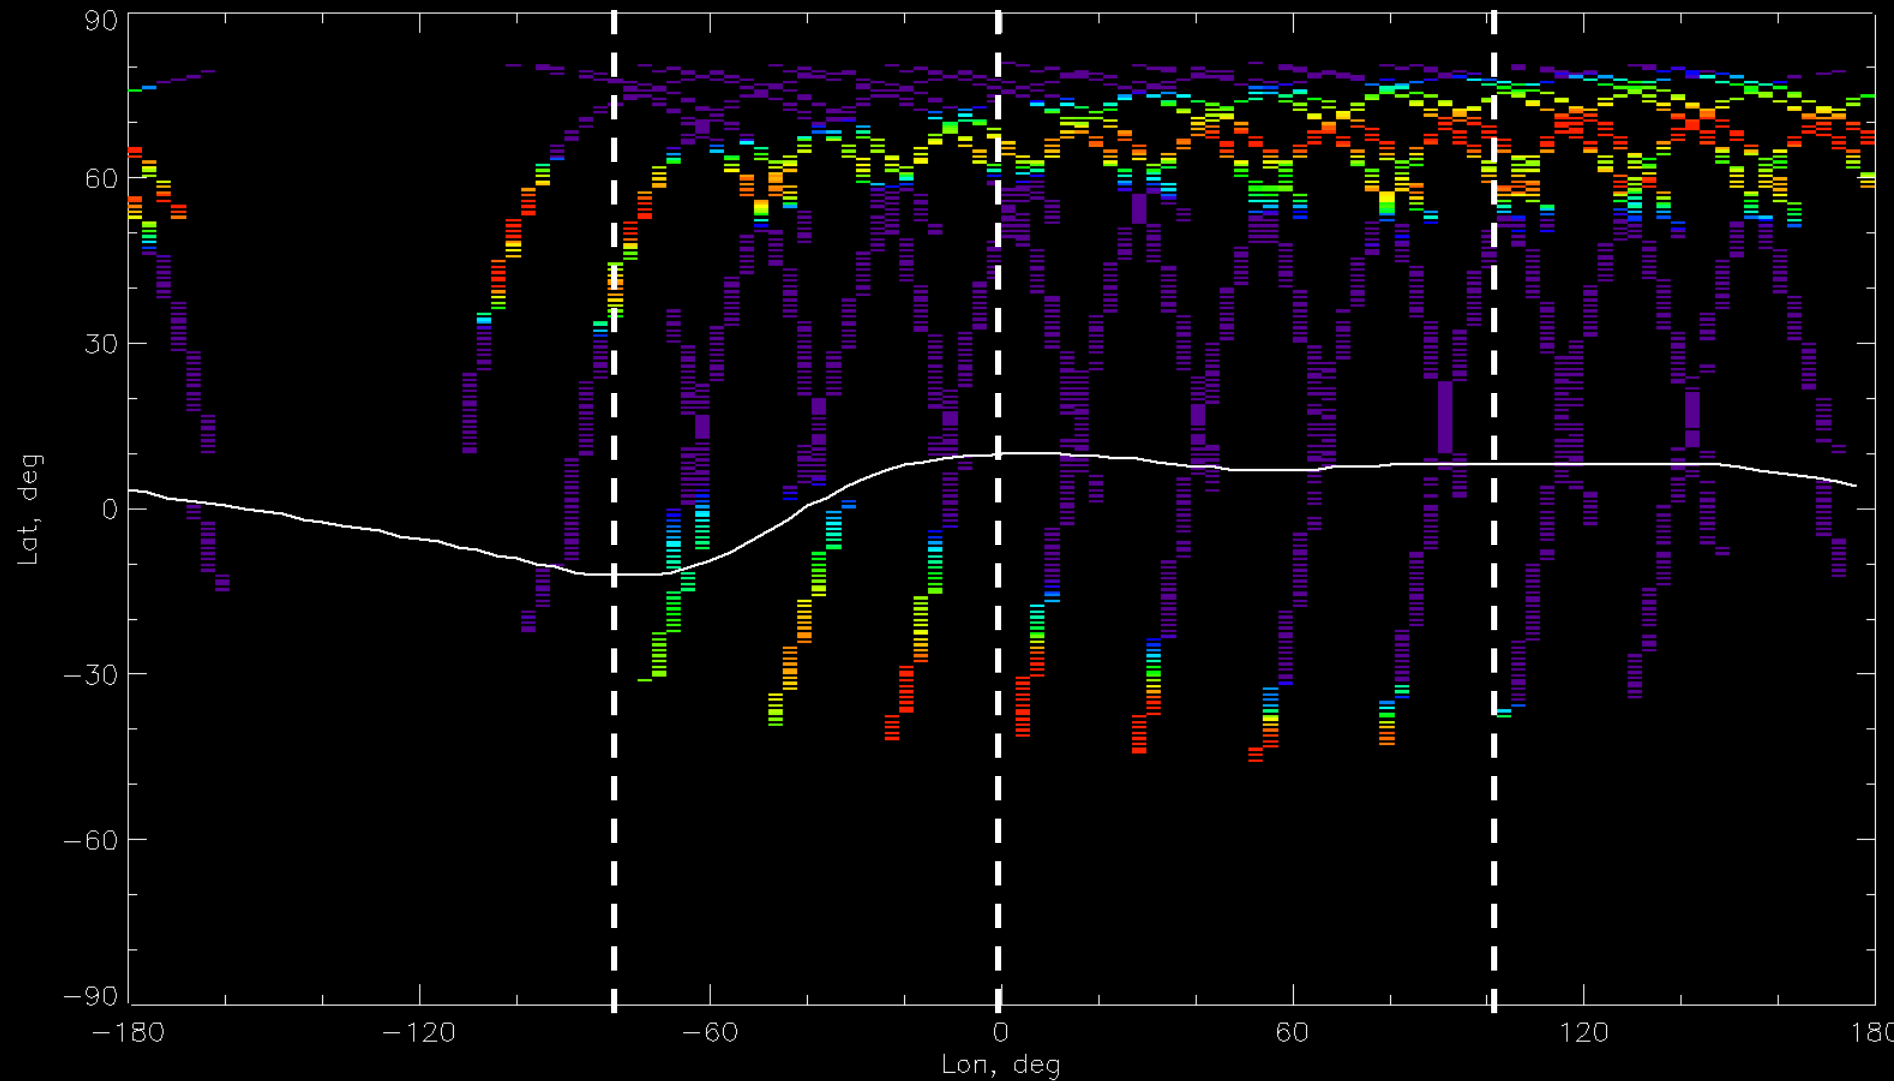

POES  $e > 30$  keV PA=90 avr 2006/08/23 0h - dt=24h

min/max: 1.0E+000/1.0E+005

POES\_mapGsum\_05

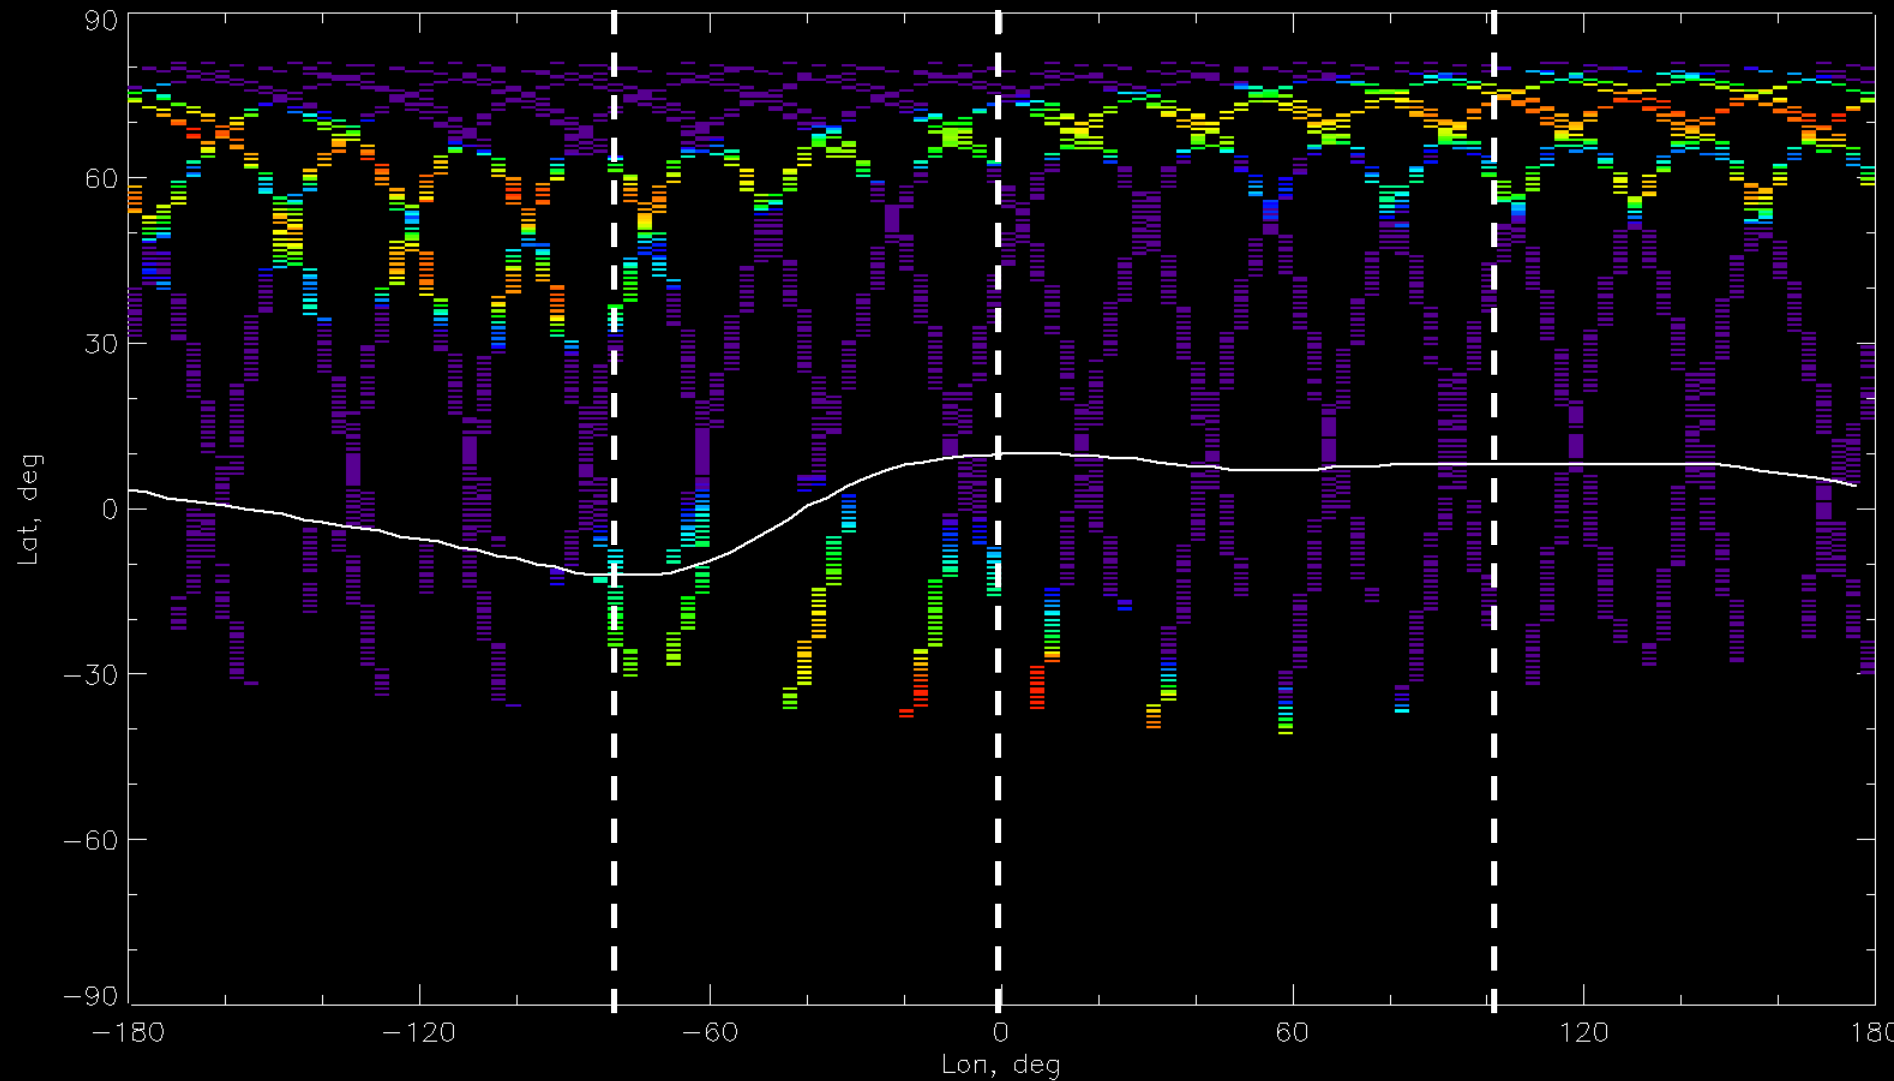



POES  $e > 30$  keV PA=90 avr 2008/08/13 0h - dt=24h

min/max: 1.0E+000/1.0E+005

POES\_mapGsum\_05

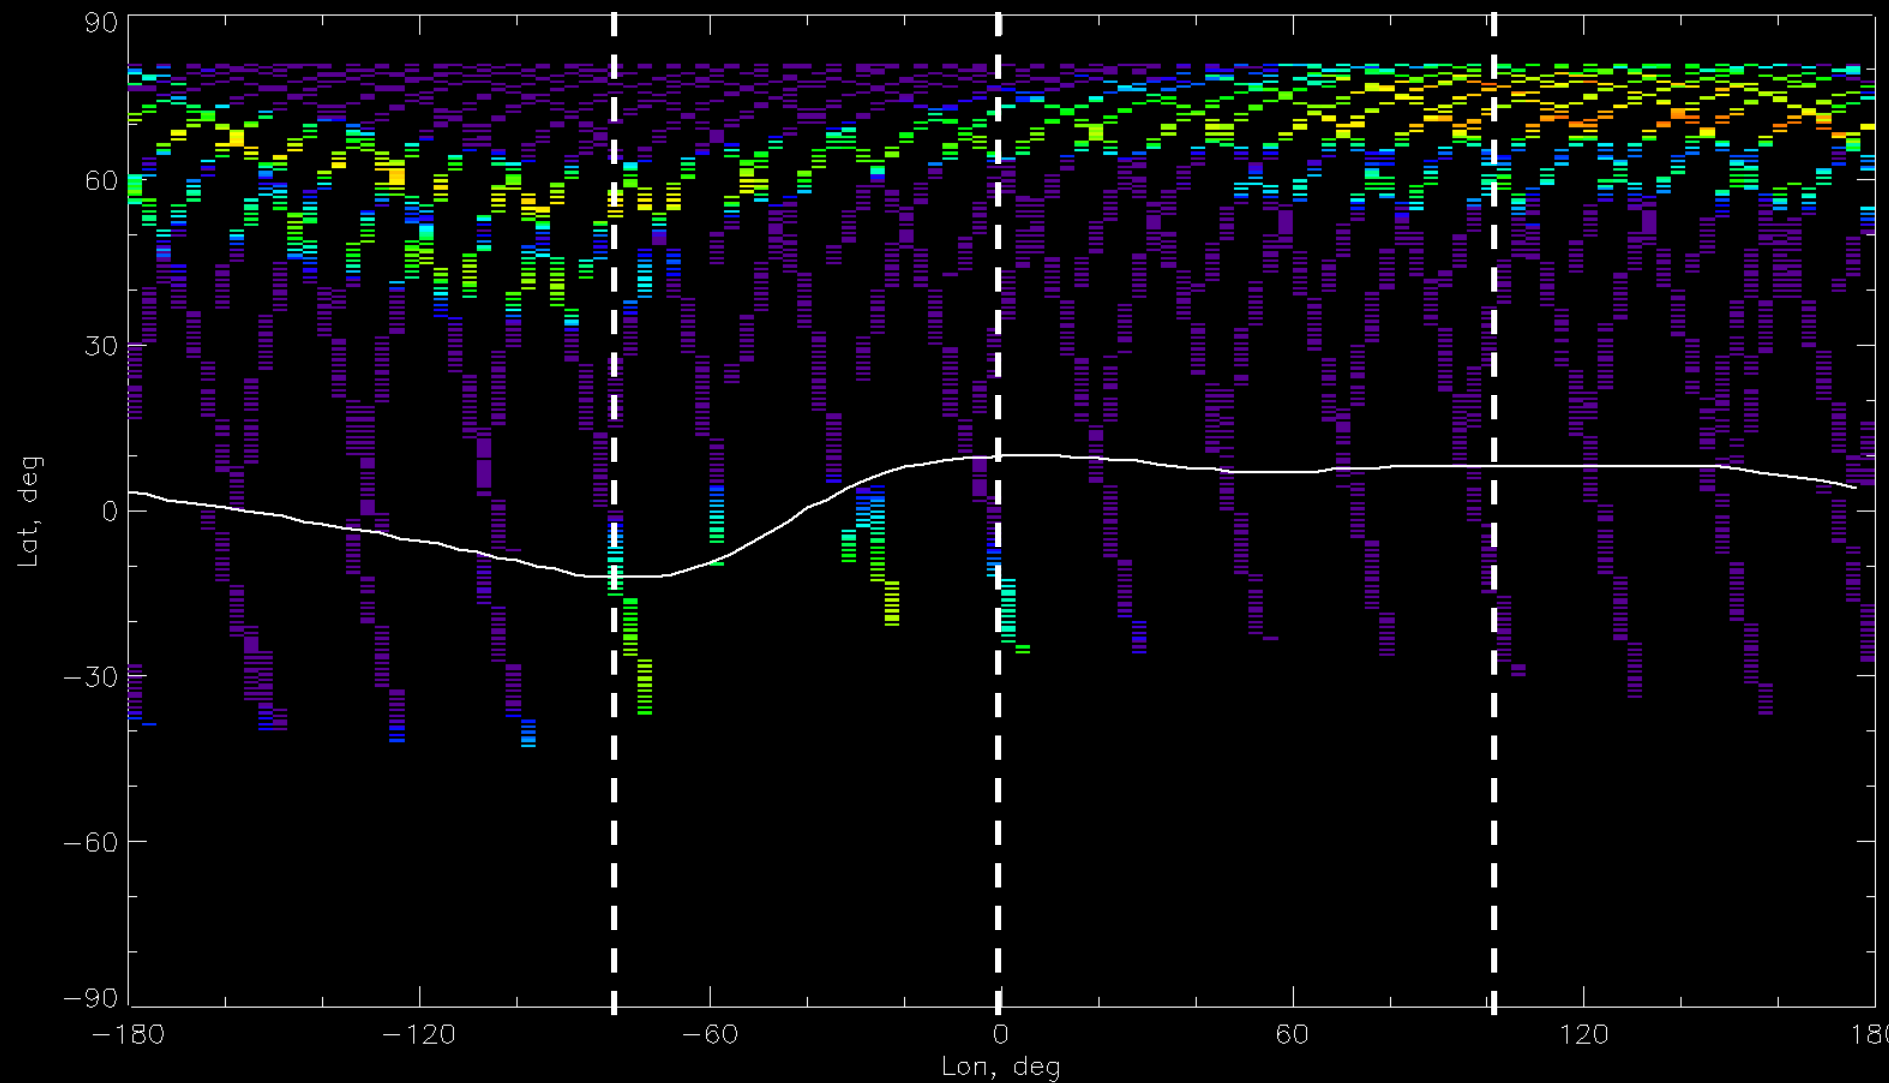

POES  $e > 30$  keV PA=90 avr 2009/08/17 0h - dt=24h

min/max: 1.0E+000/1.0E+005

POES\_mapGsum\_05

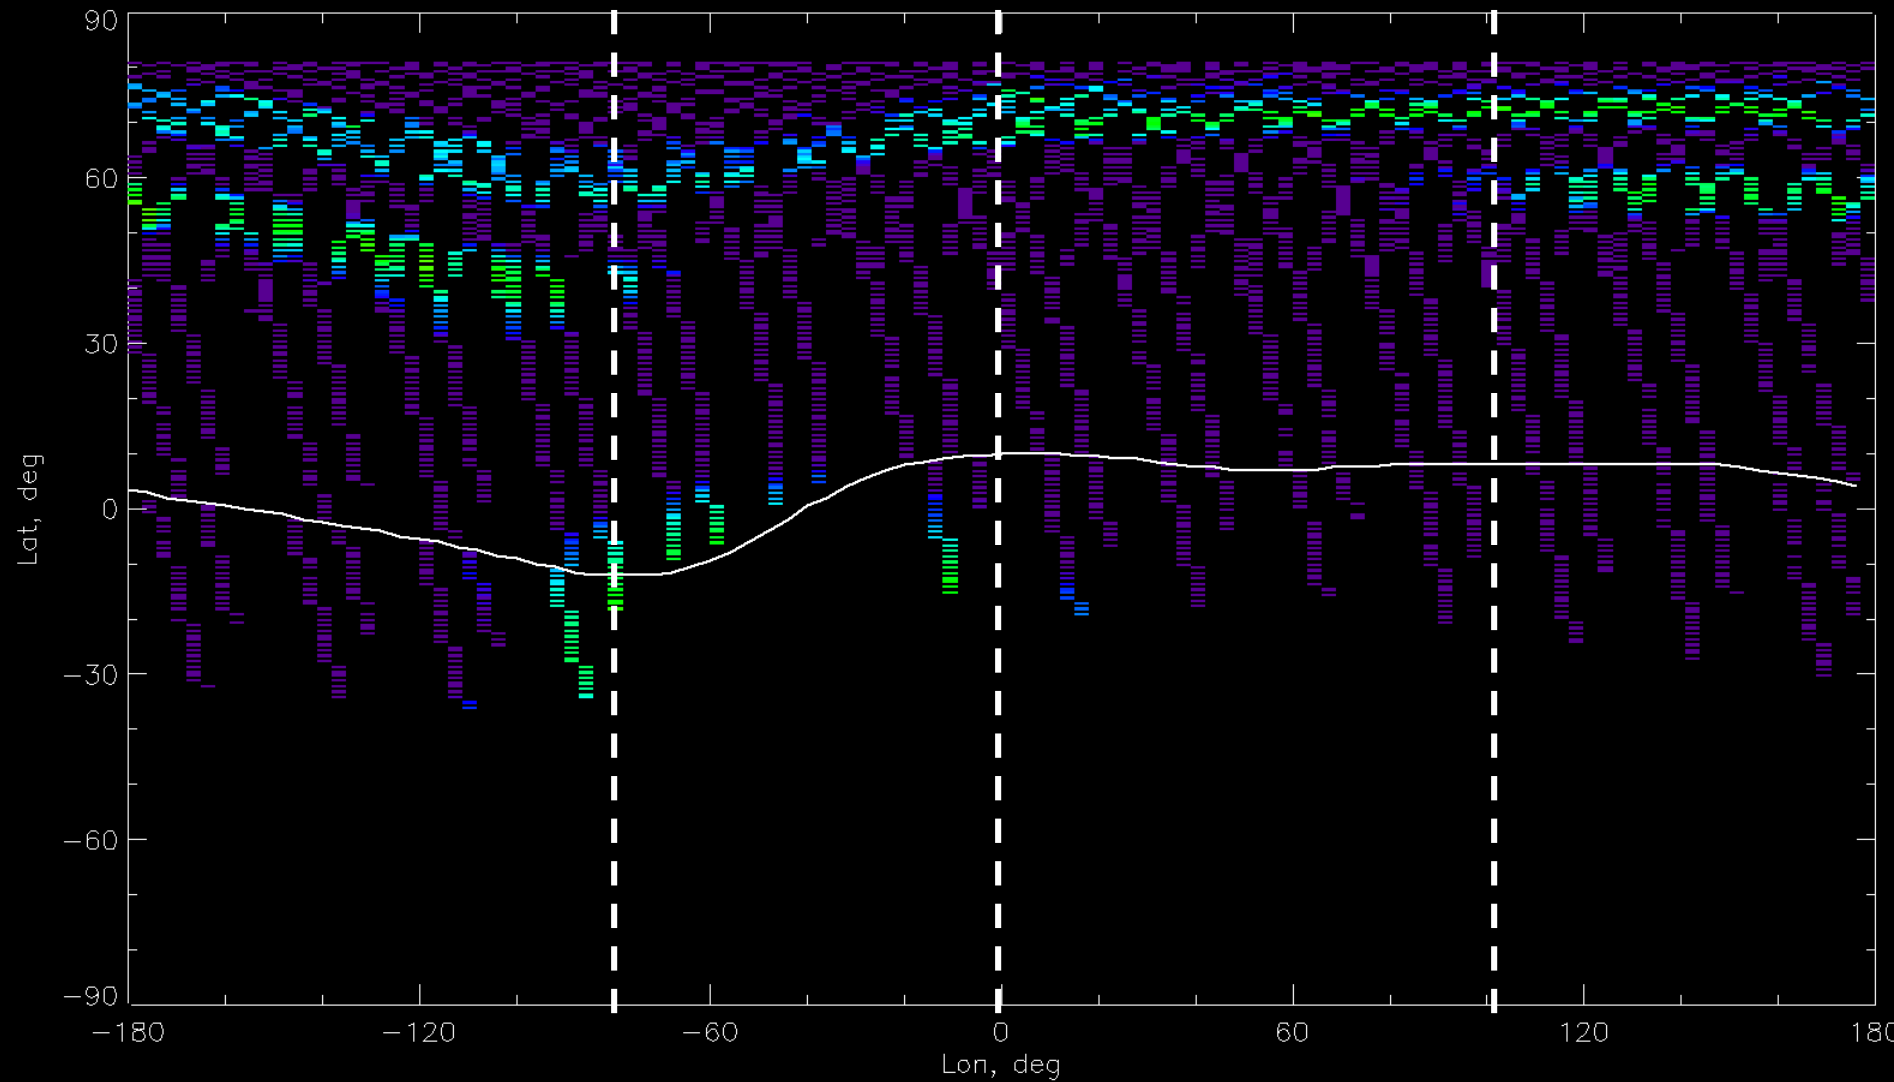

POES e&gt;30 keV PA=90 avr 2010/08/12 0h - dt=24h

min/max: 1.0E+000/1.0E+005

POES\_mapGsum\_05

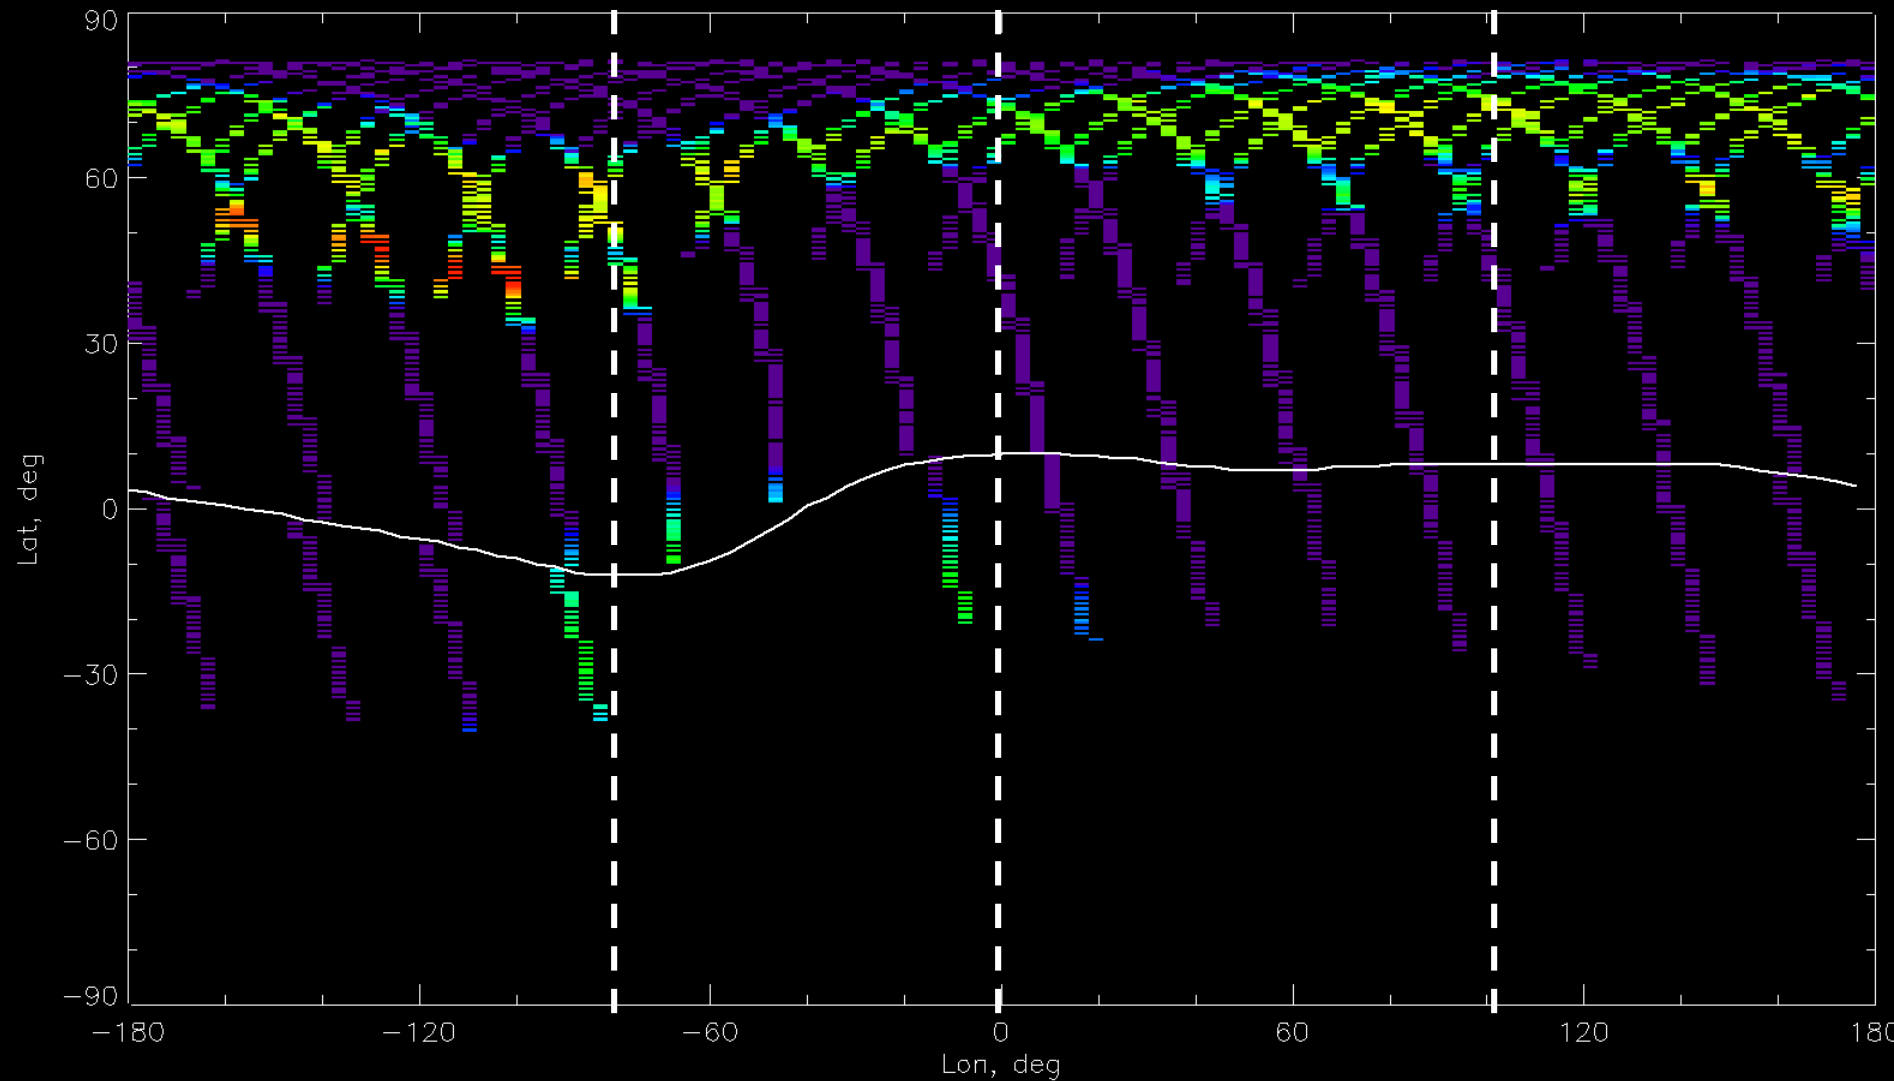

POES  $e > 30$  keV PA=90 avr 2011/08/28 8h - dt=24h

min/max: 1.0E+000/1.0E+005

POES\_mapGsum\_05

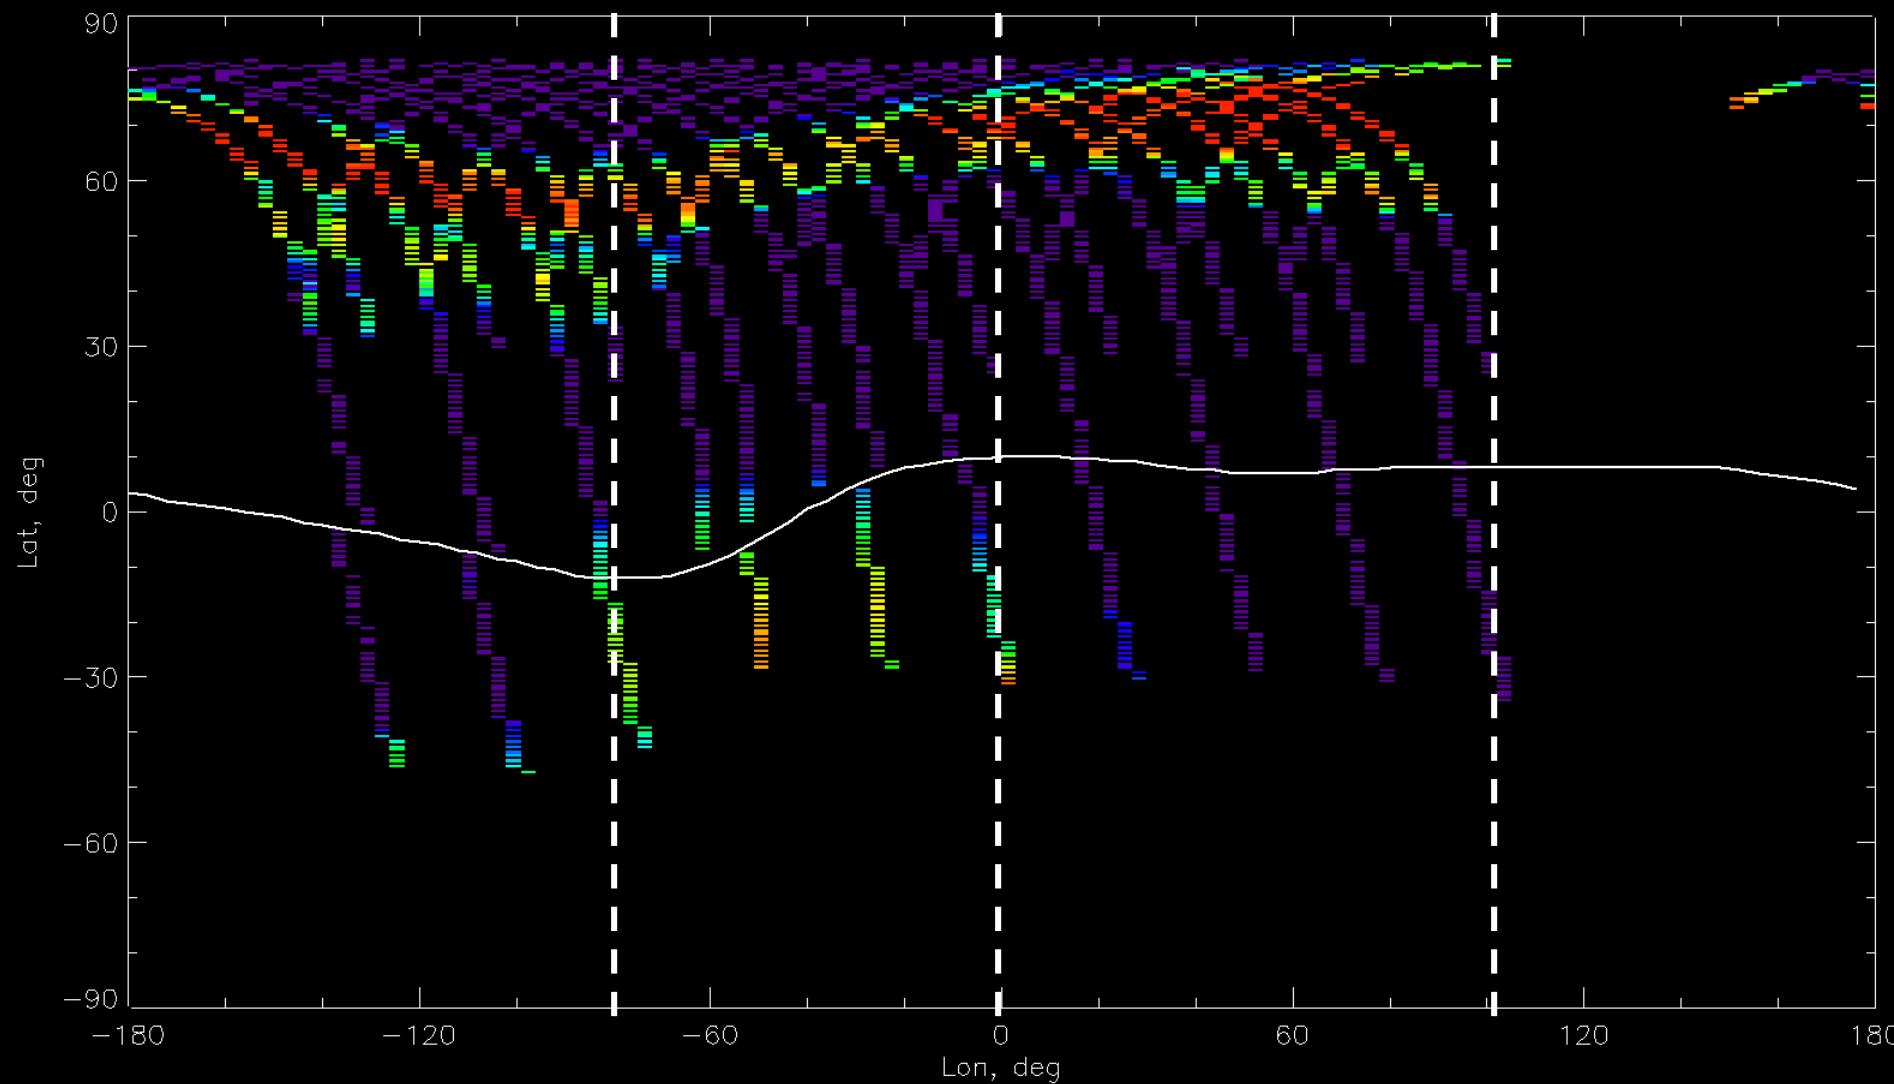

POES  $e > 30$  keV PA=90 avr 2012/08/15 0h - dt=24h

min/max: 1.0E+000/1.0E+005

POES\_mapGsum\_05

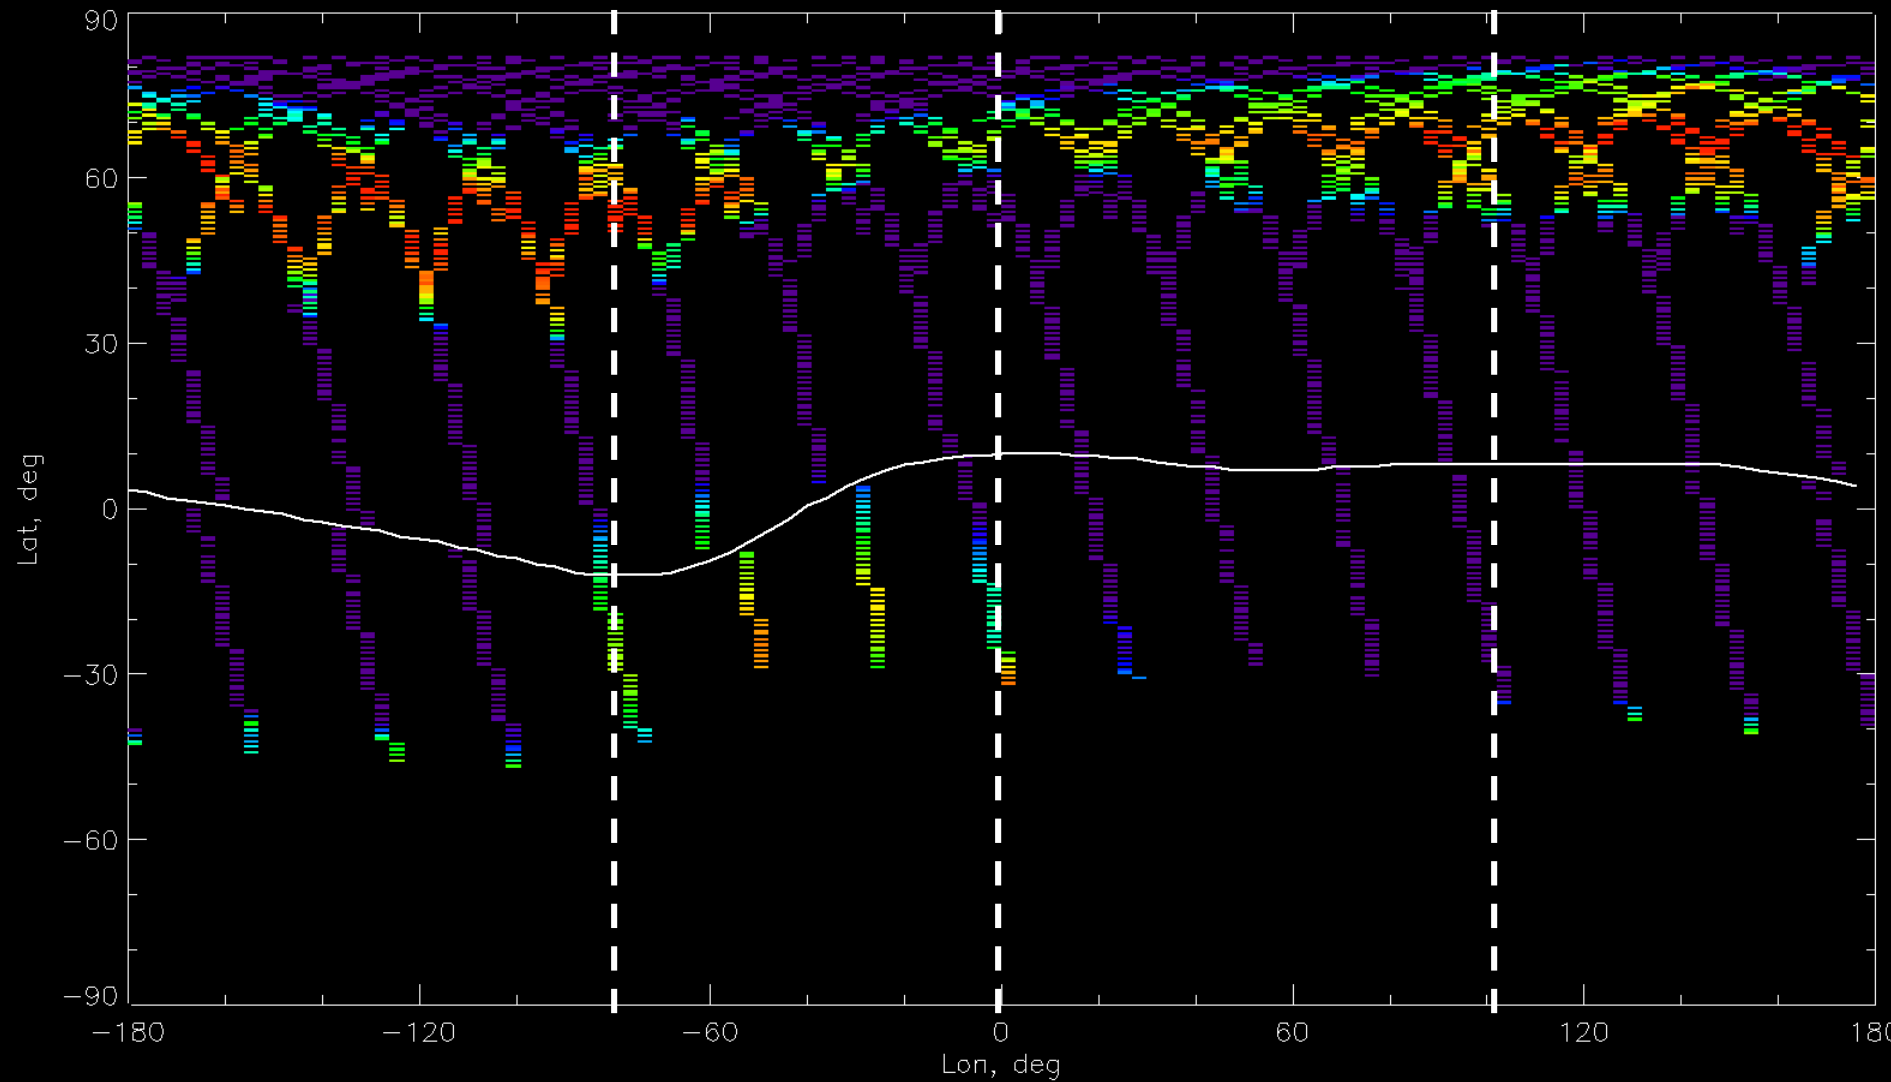

POES e&gt;40 keV PA=90 avr 2013/08/16 0h - dt=24h

min/max: 1.0E+001/1.0E+006

POES\_mapGsum\_05

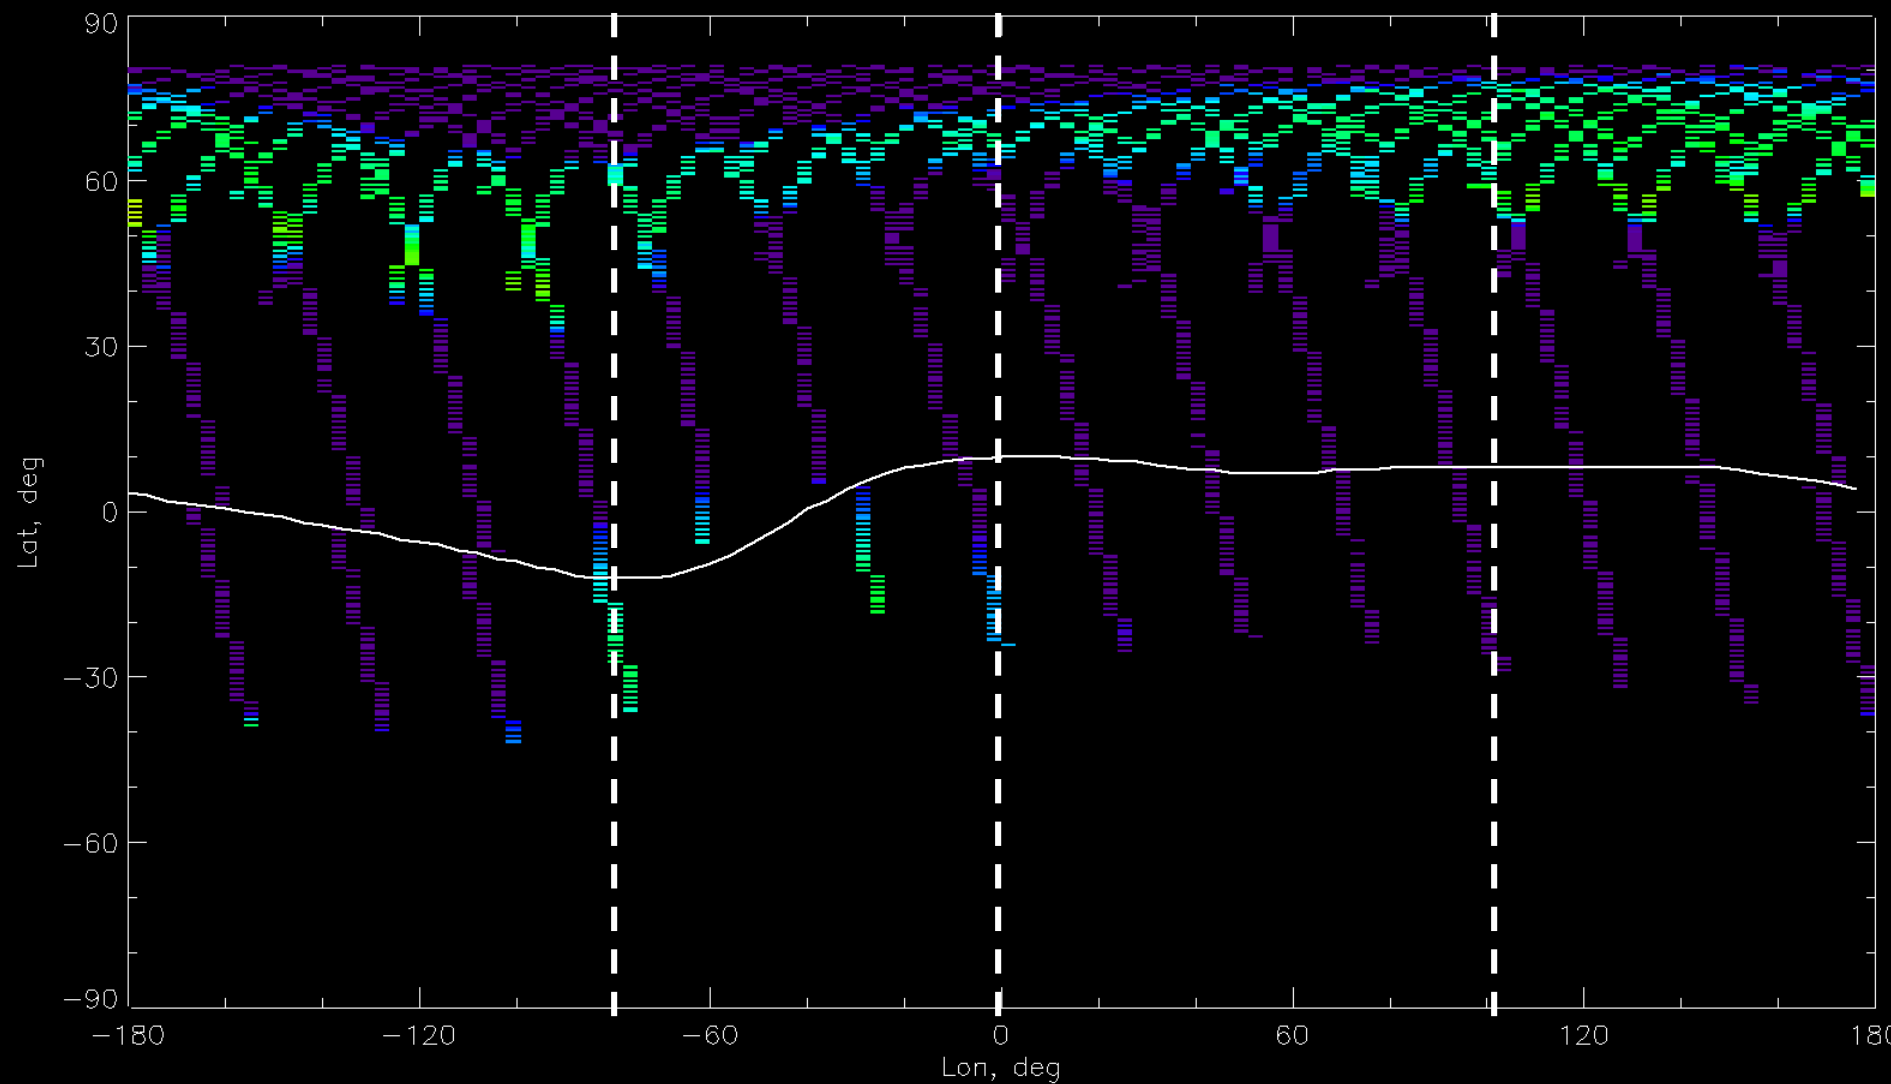

POES e&gt;40 keV PA=90 avr 2014/08/01 0h - dt=36h

min/max: 1.0E+001/1.0E+006

POES\_mapGsum\_05

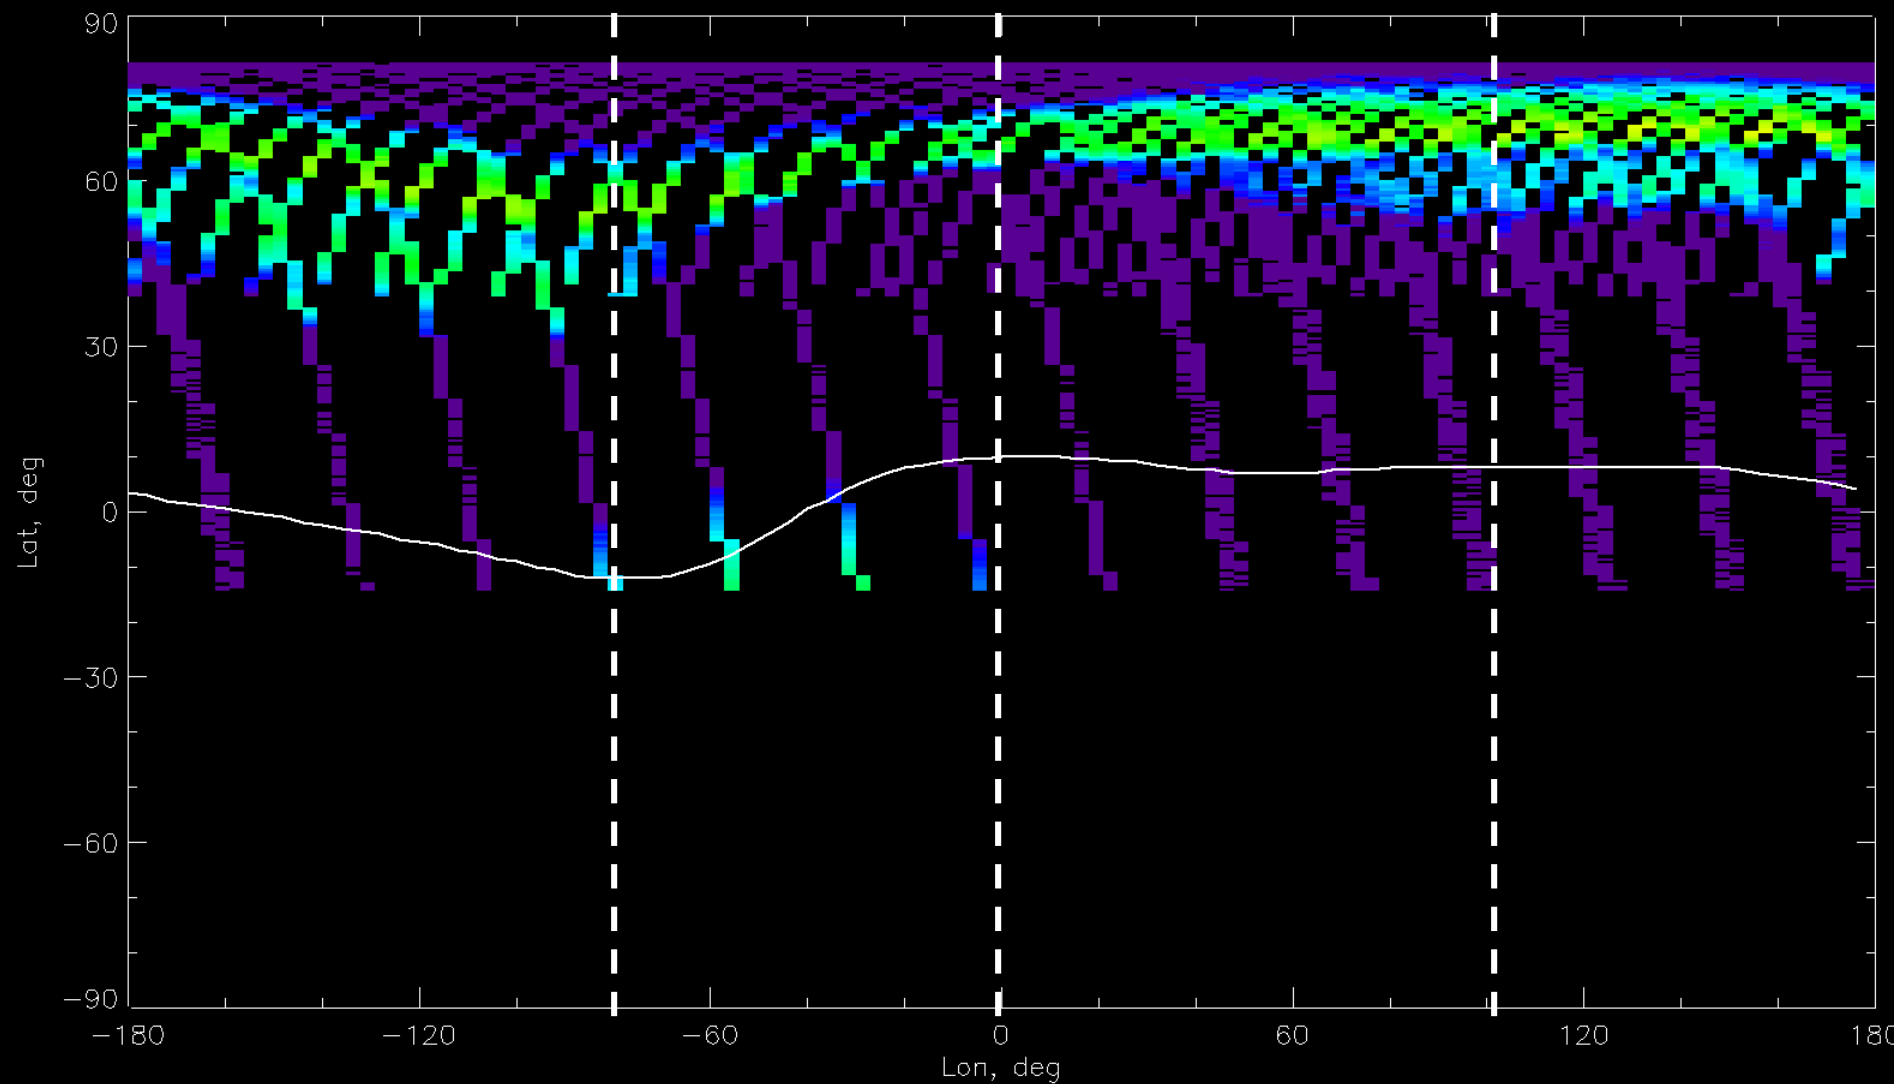

POES  $e > 40$  keV PA=90 avr 2015/08/04 0h - dt=24h

min/max: 1.0E+001/1.0E+006

POES\_mapGsum\_05

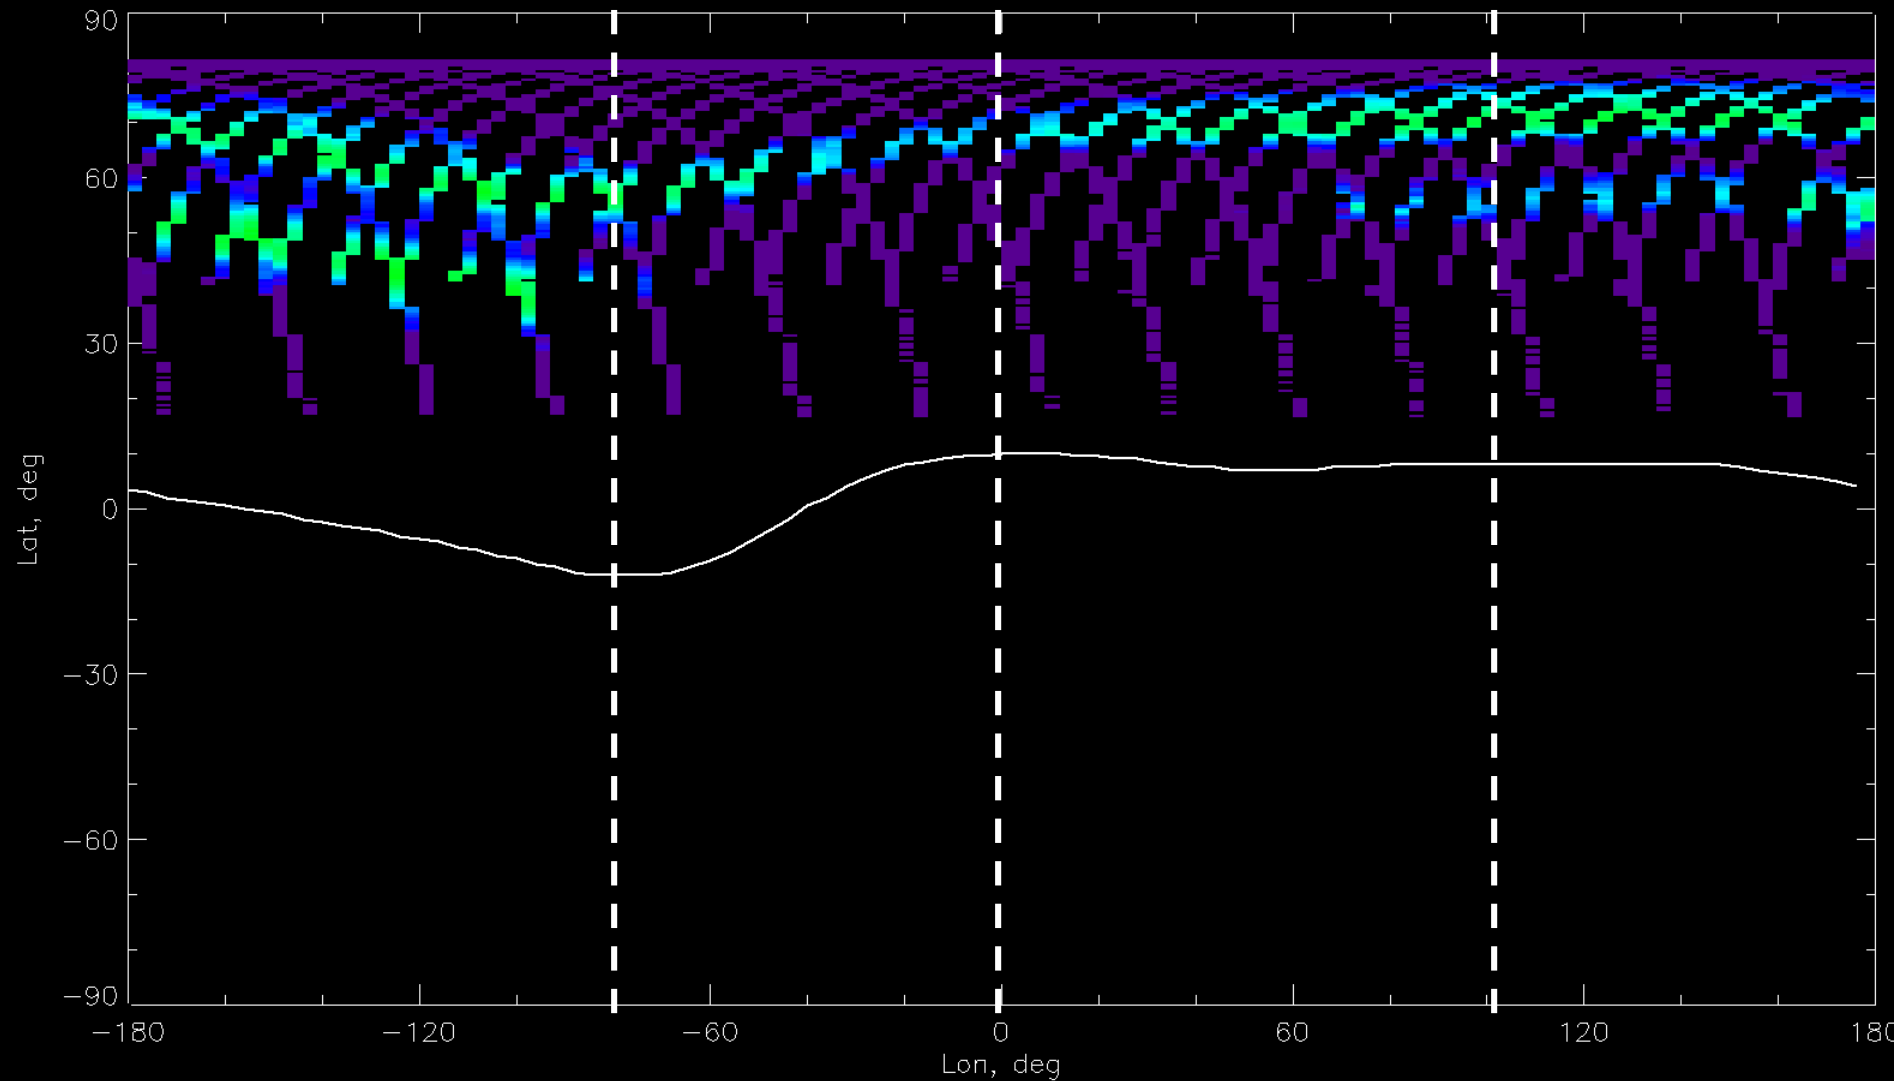



POES e &gt; 30 keV PA=90 avr 2016/06/03 0h - dt=24h

min/max: 3.0E+001/3.0E+006

POES\_mapGsum\_05

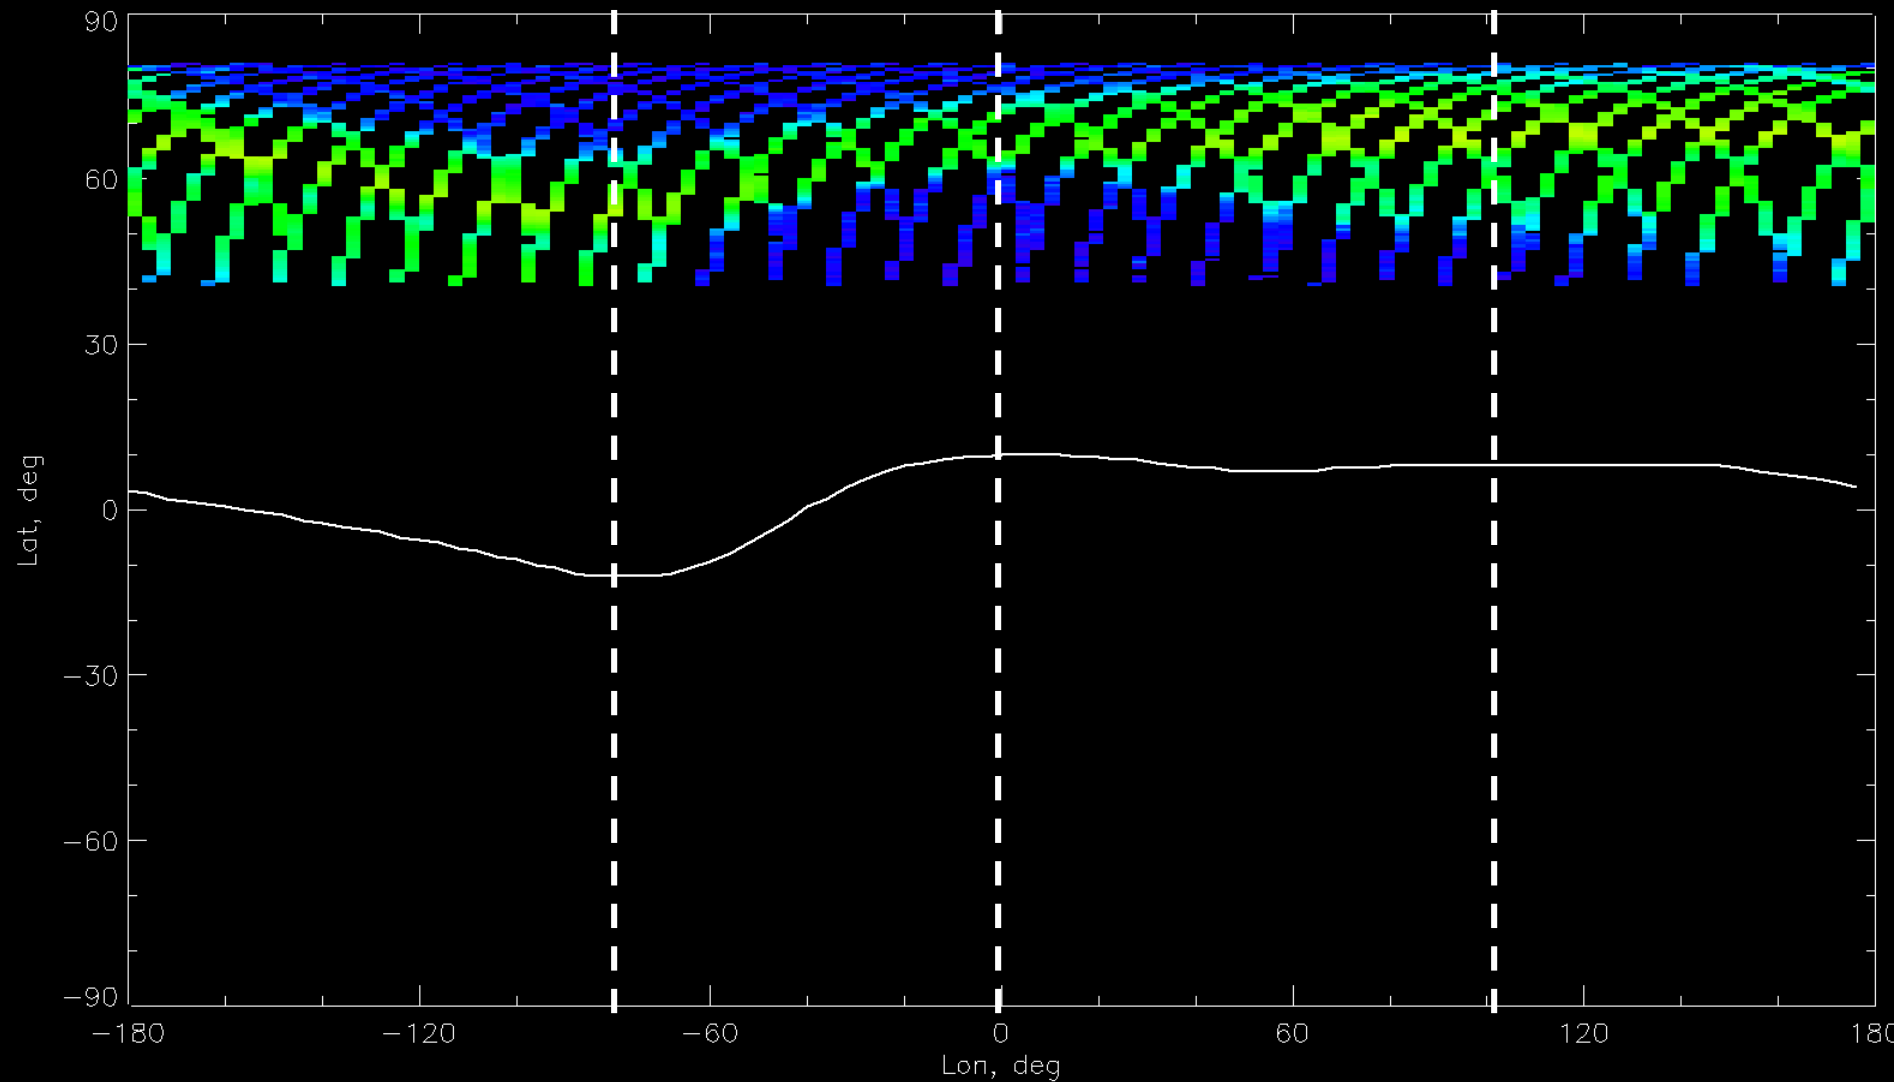

POES e&gt;40 keV PA=90 avr 2017/08/09 8h - dt=24h

min/max: 1.0E+000/1.0E+005

POES\_mapGsum\_05

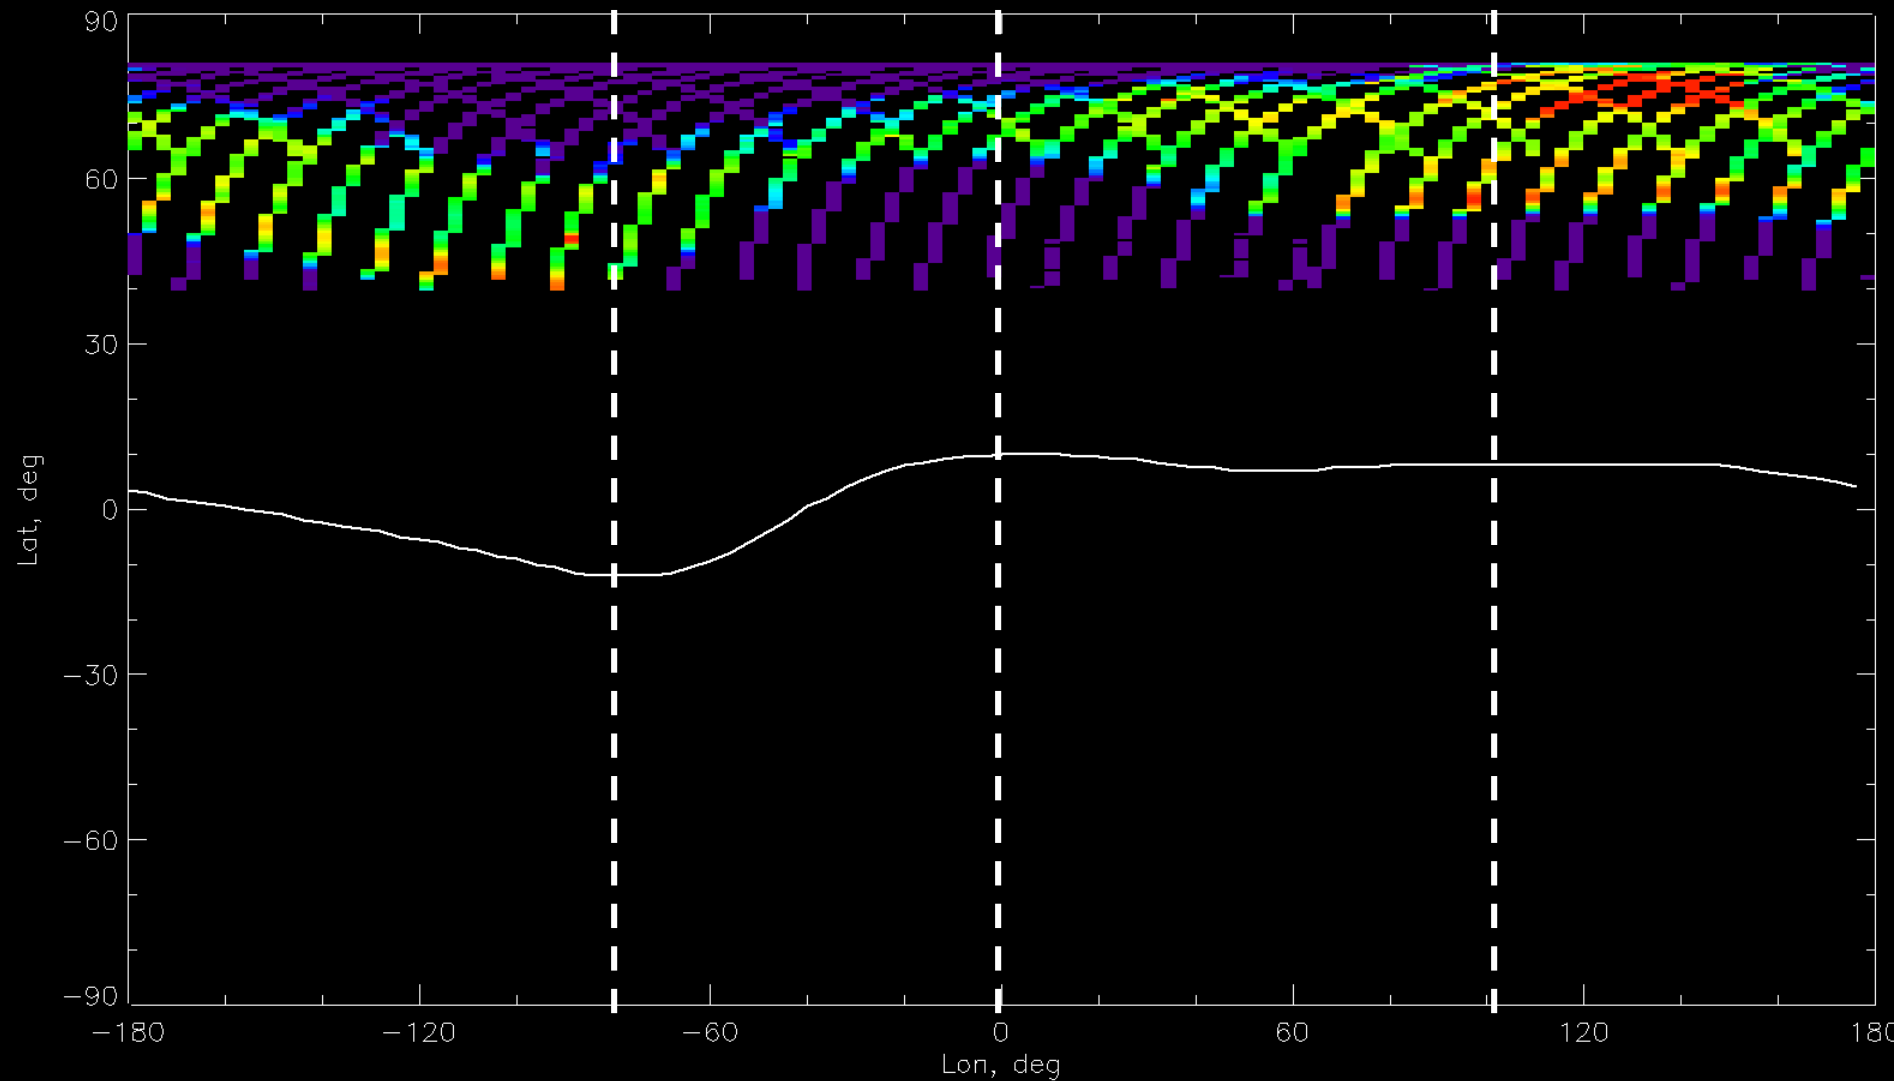

POES e &gt; 30 keV PA=90 avr 2018/06/12 08h - dt=24h

min/max: 1.0E+003/1.0E+006

POES\_mapGsum\_05

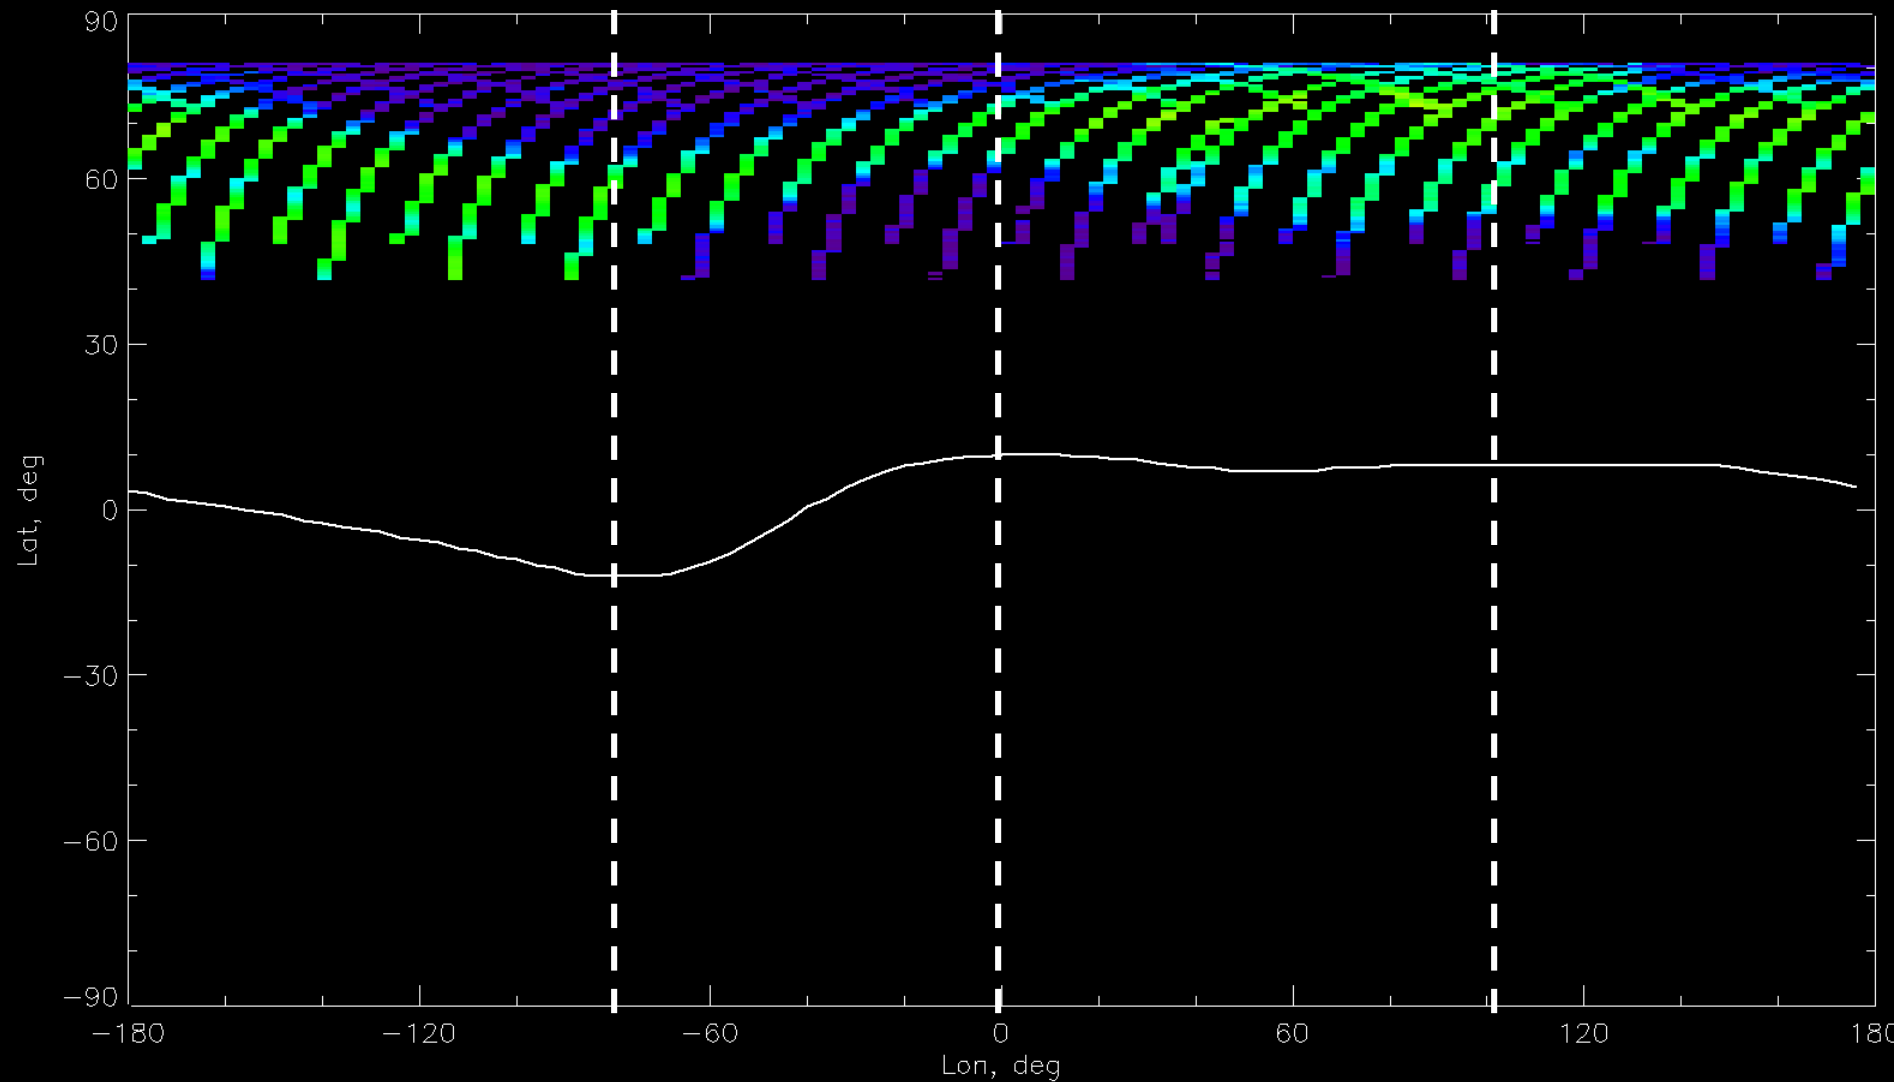

POES e &gt; 100 keV PA=90 avr 2001/06/29 0h - dt=24h

min/max: 1.0E+003/1.0E+006

POES\_mapGsum\_05

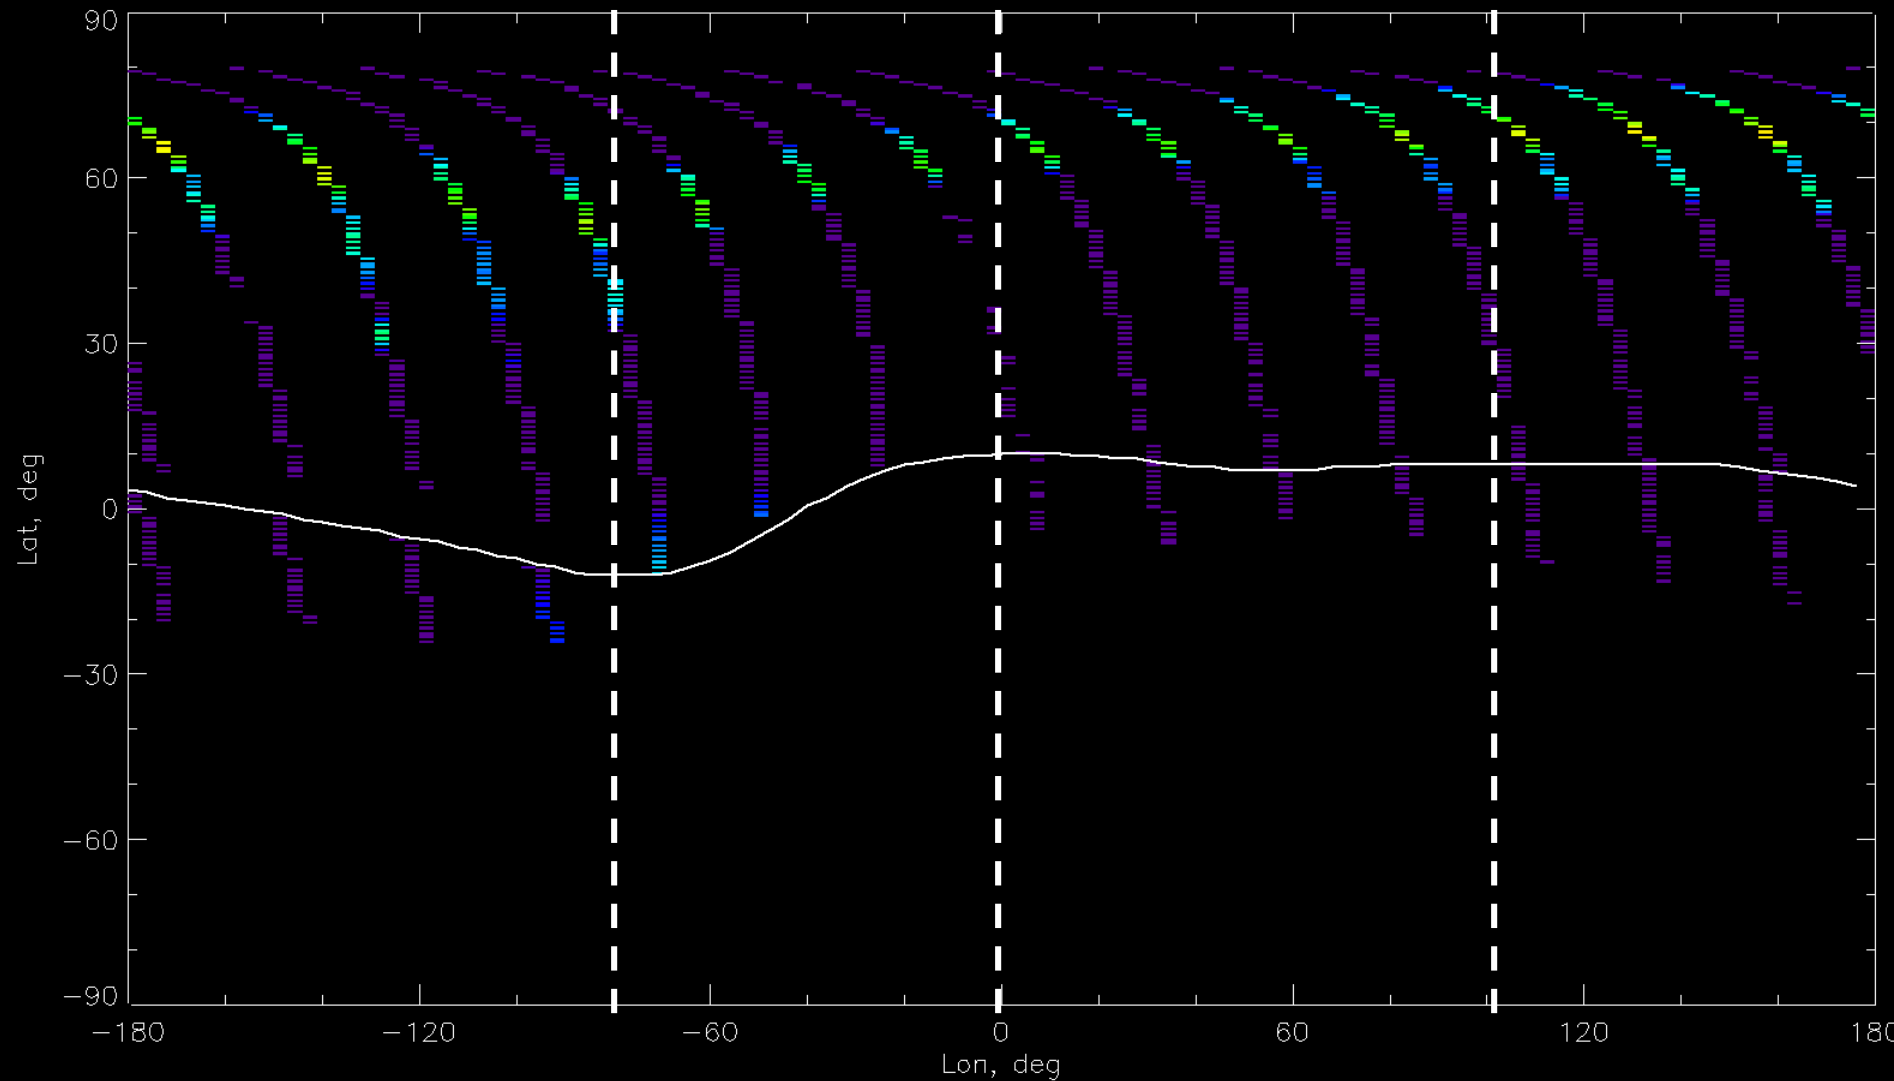

POES e &gt; 100 keV PA=90 avr 2002/06/28 0h - dt=24h

min/max: 1.0E+003/1.0E+006

POES\_map3sum\_05

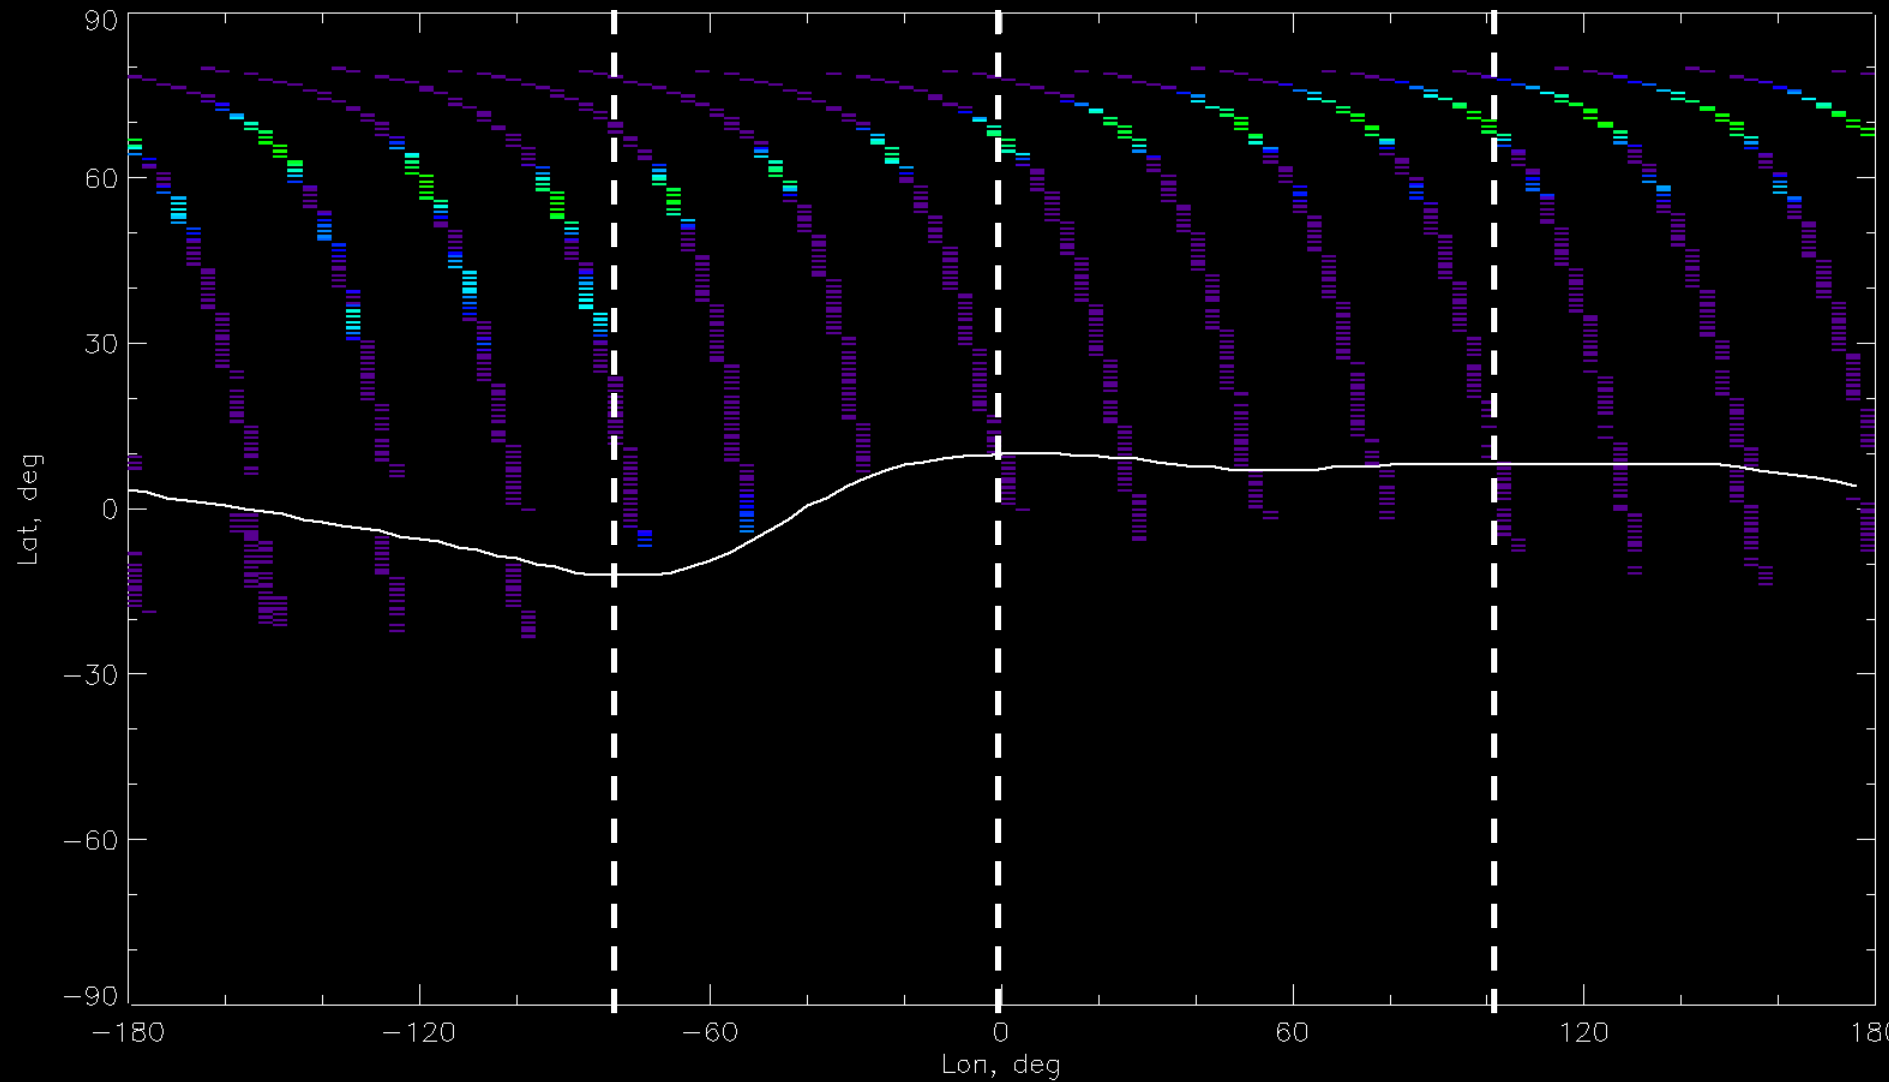

POES e &gt; 100 keV PA=90 avr 2004/06/24 12h - dt=24h

min/max: 1.0E+003/1.0E+006

POES\_mapGsum\_05

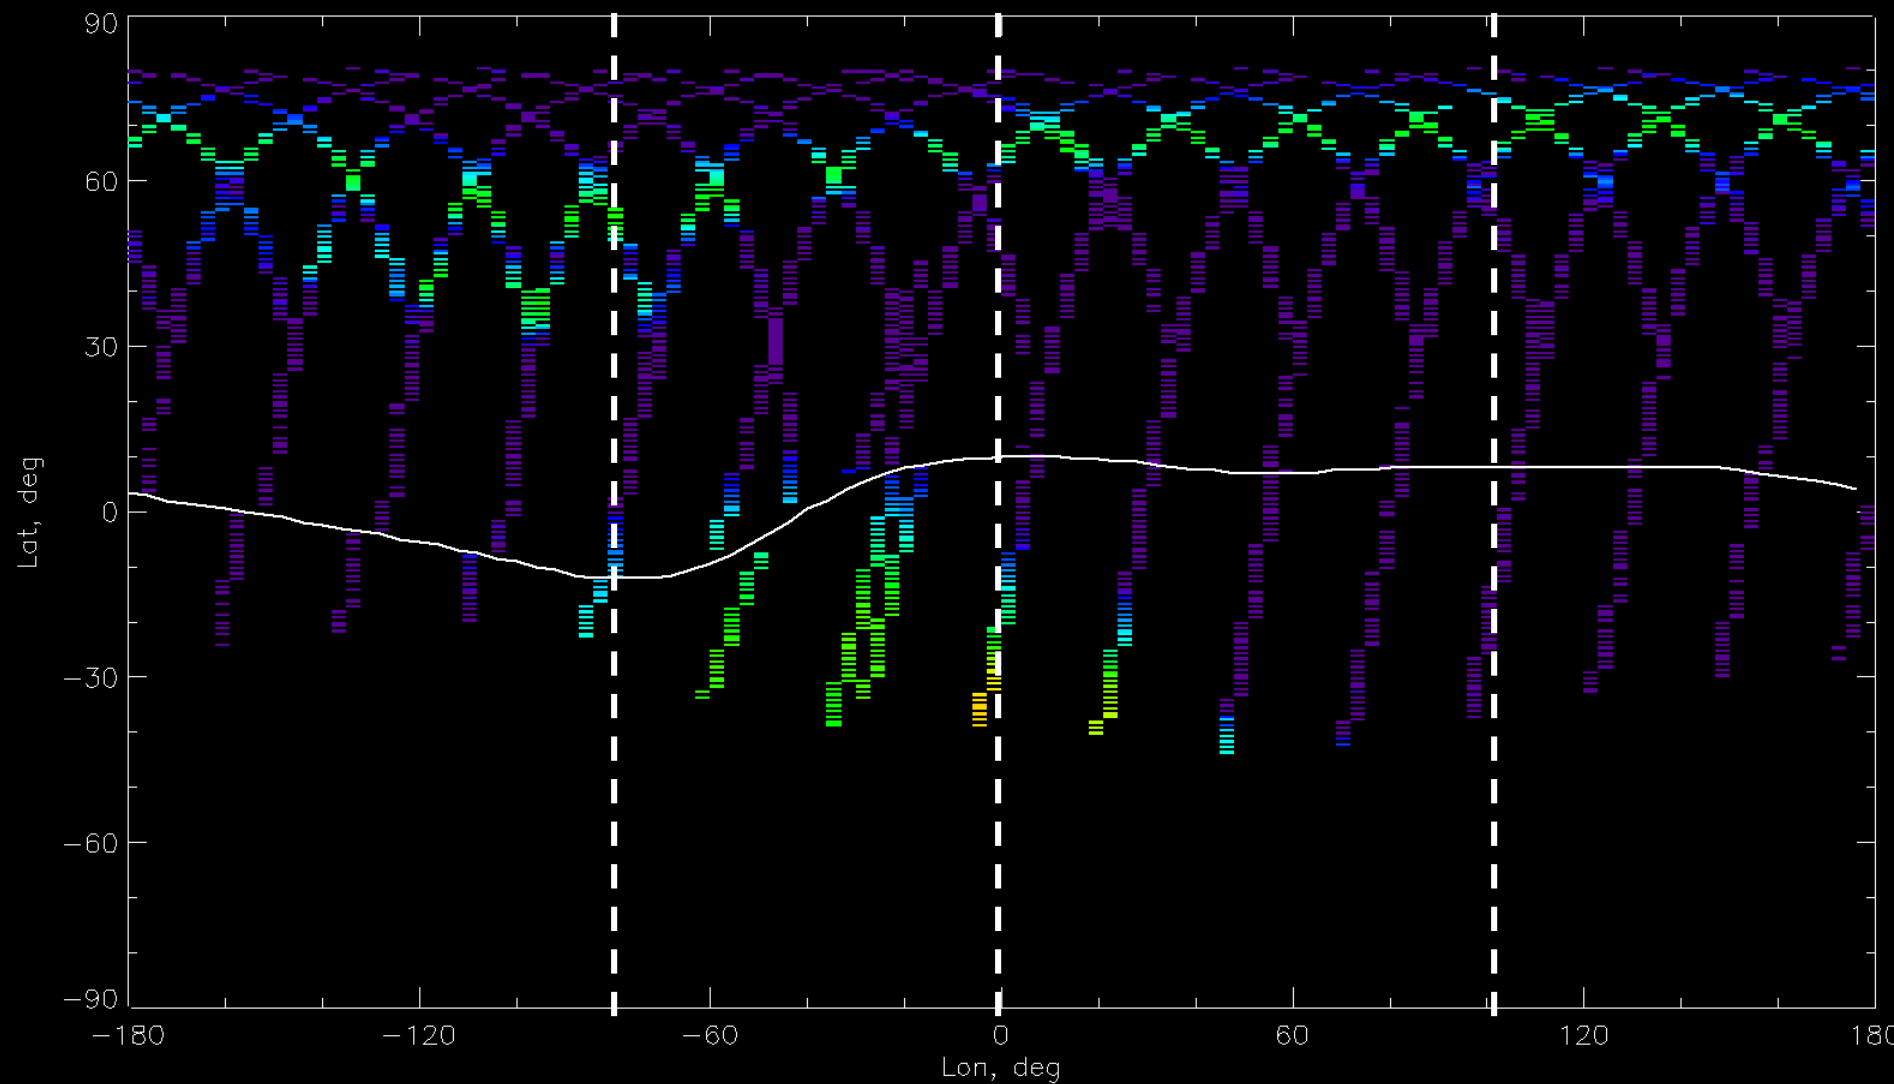

POES e &gt; 100 keV PA=90 avr 2005/06/21 0h - dt=18h

min/max: 1.0E+003/1.0E+006

POES\_mapGsum\_05

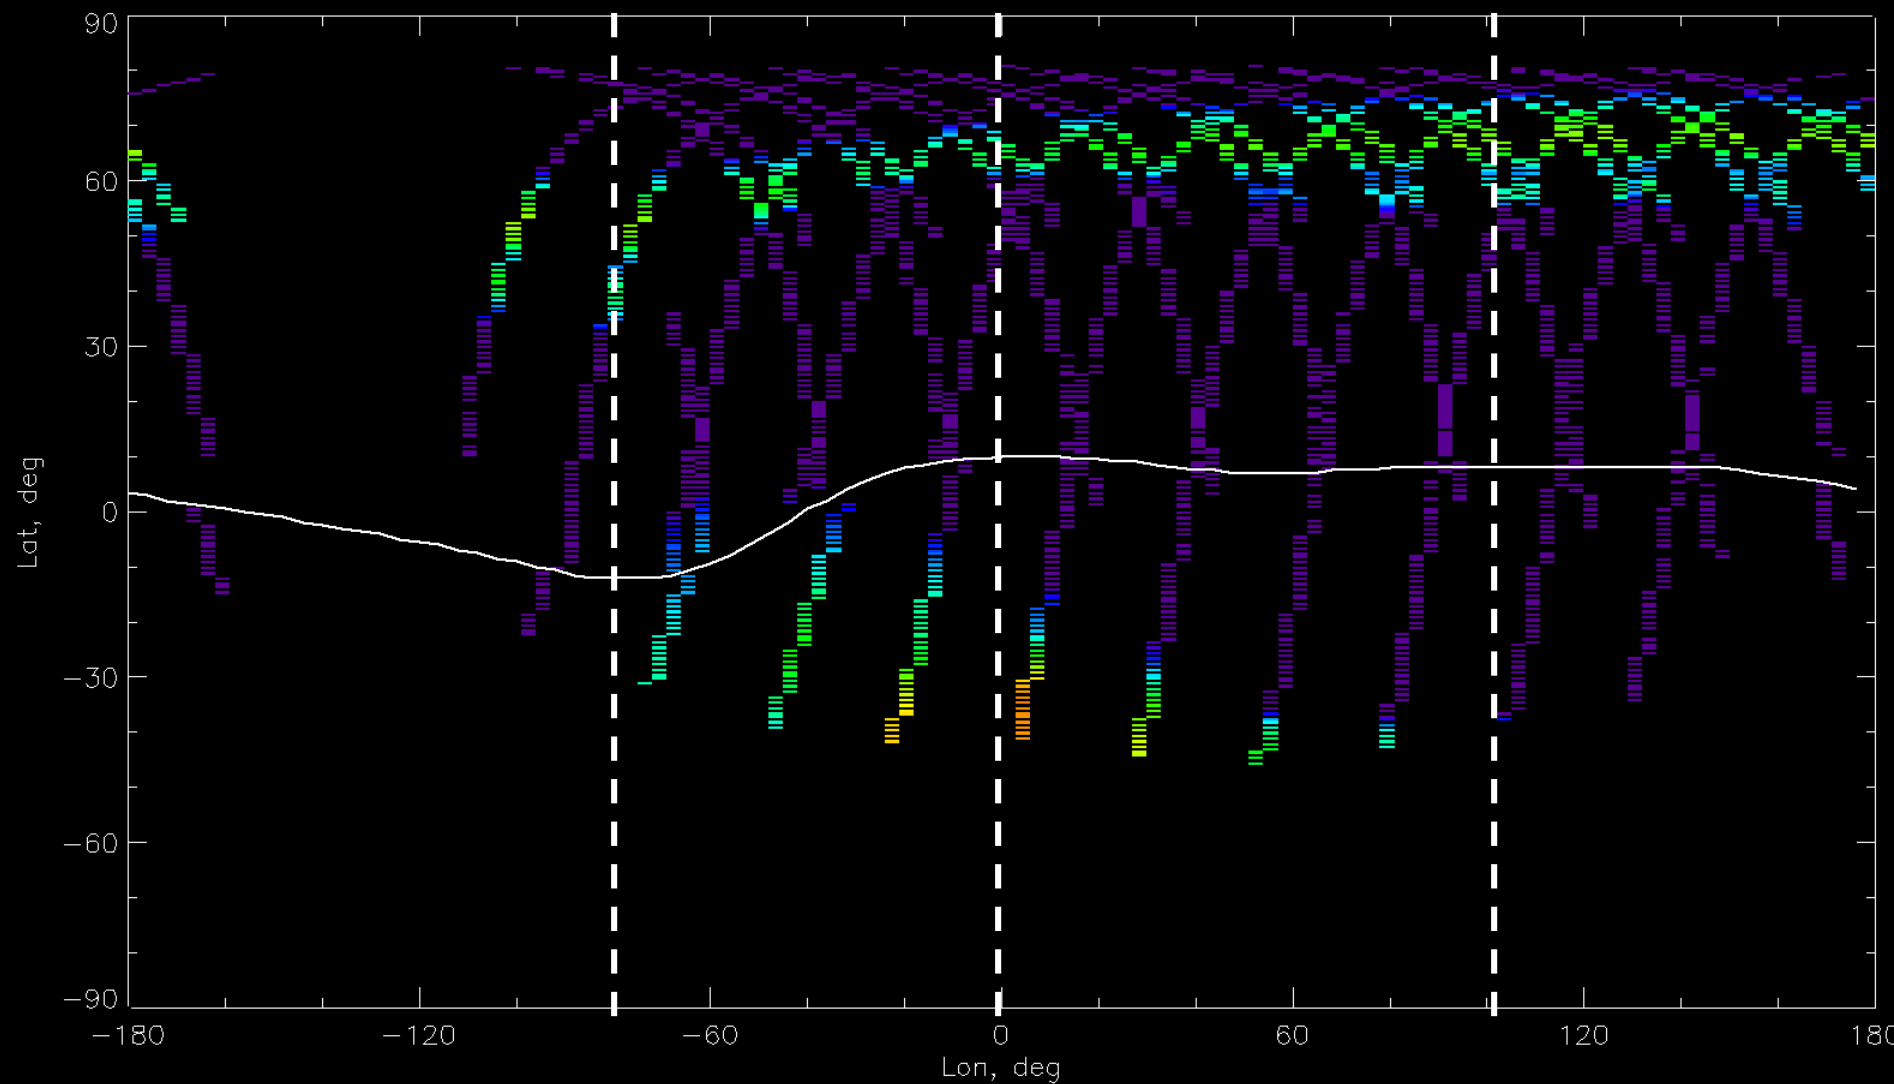

POES e &gt; 100 keV PA=90 avr 2006/06/23 0h - dt=24h

min/max: 1.0E+003/1.0E+006

POES\_mapGsum\_05

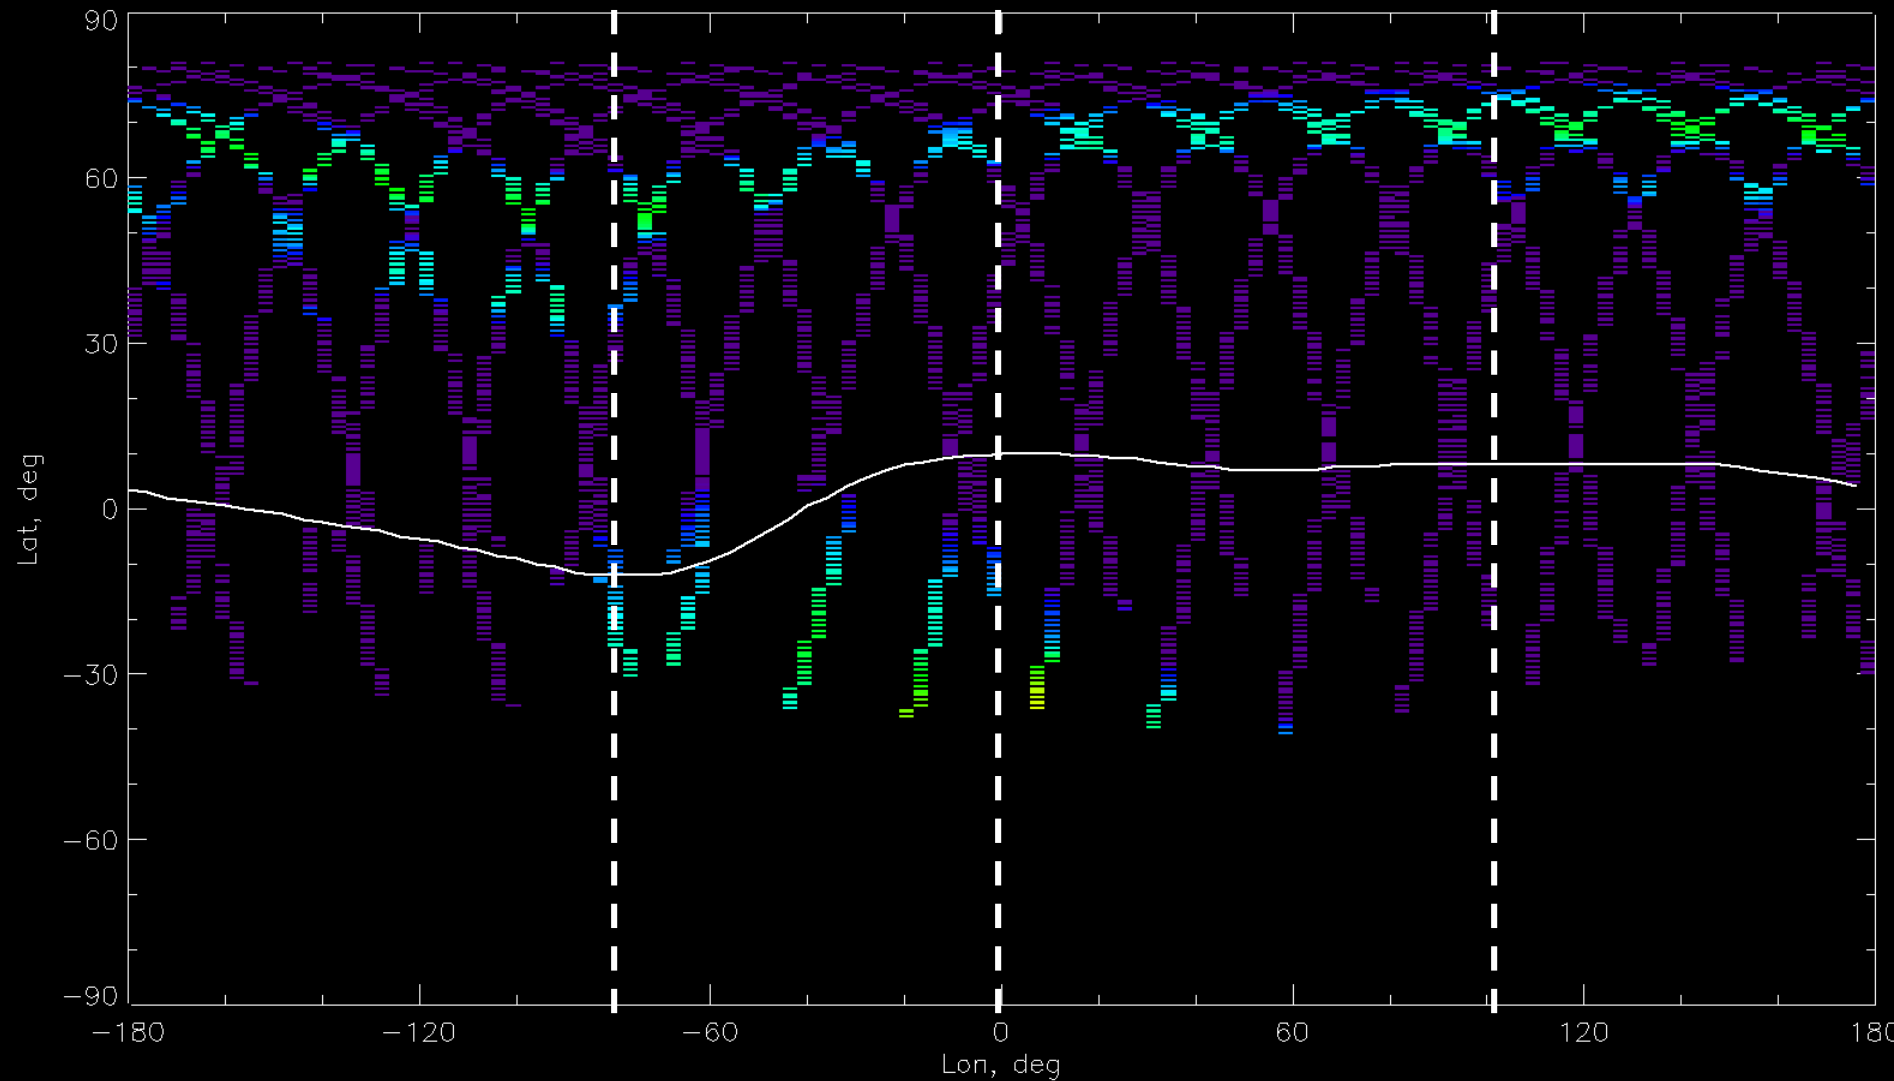



POES e &gt; 100 keV PA=90 avr 2008/06/13 0h - dt=24h

min/max: 1.0E+003/1.0E+006

POES\_mapGsum\_05

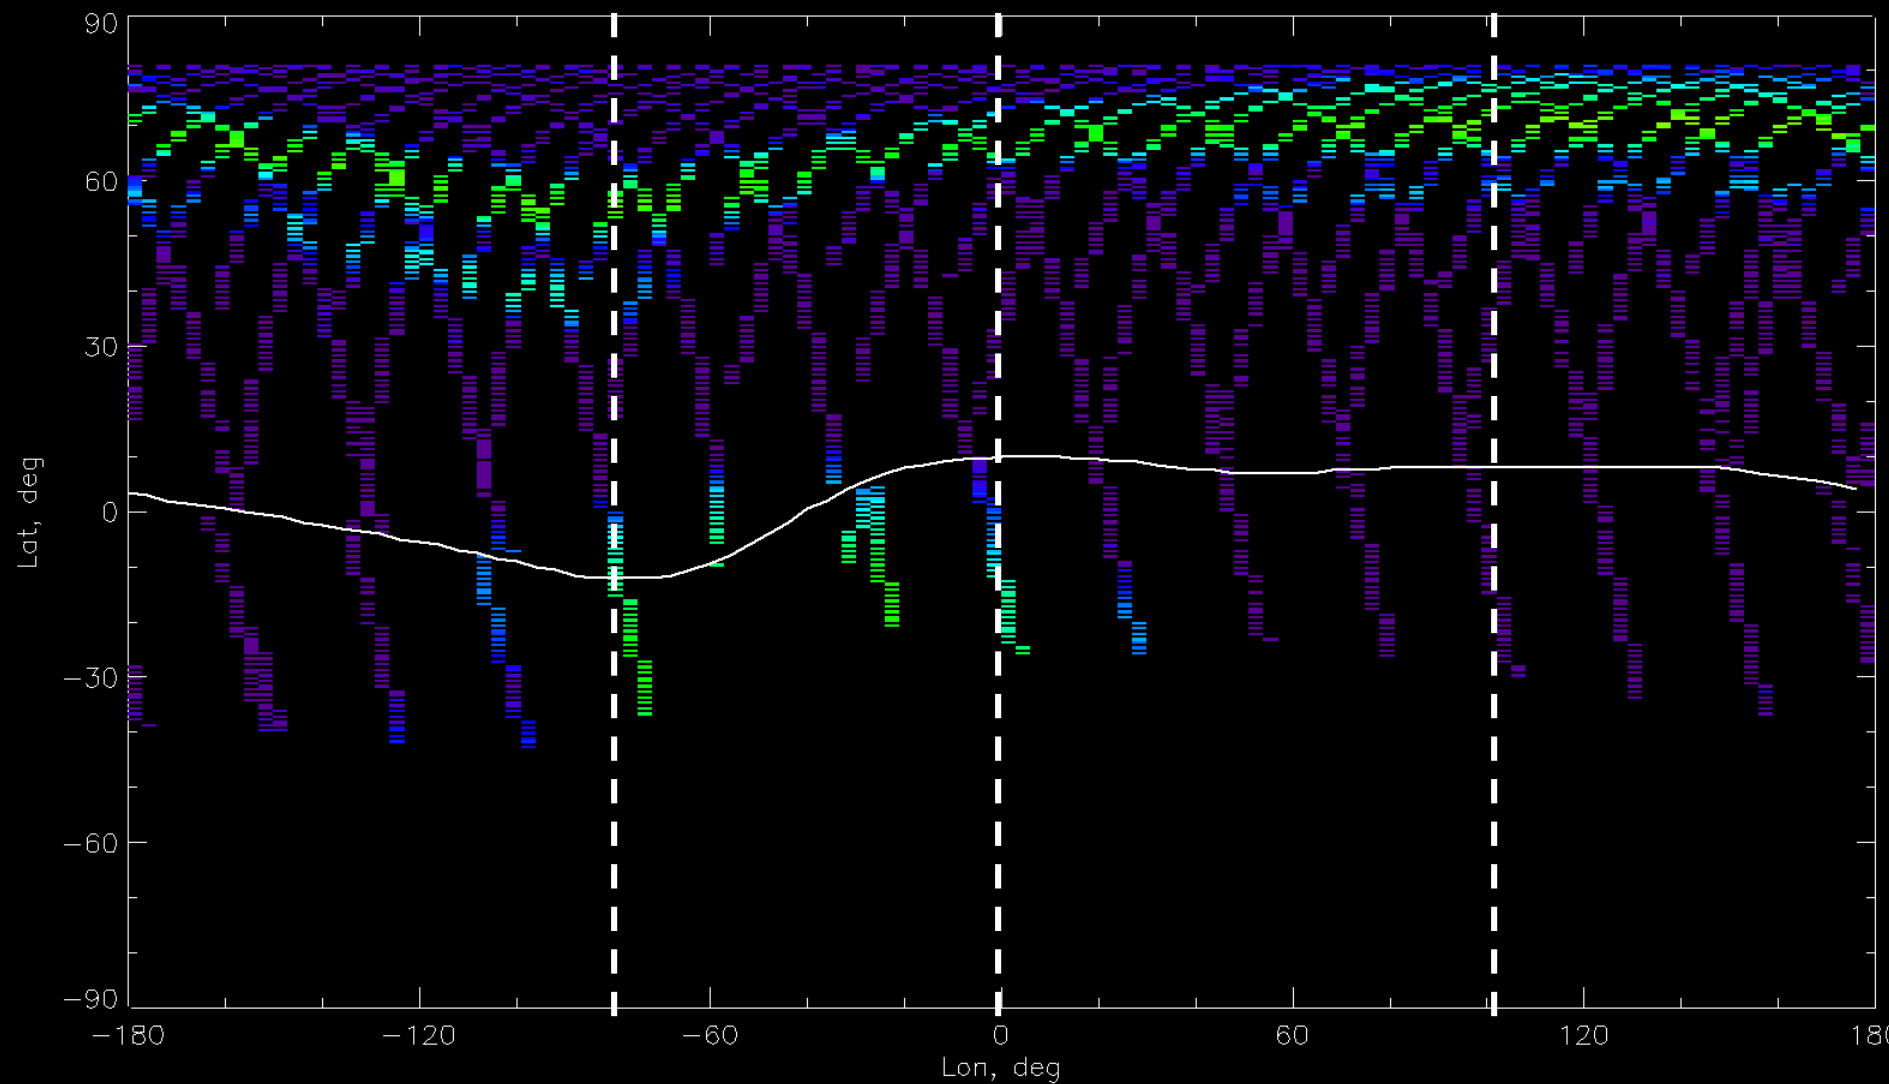

POES e &gt; 100 keV PA=90 avr 2009/06/17 0h - dt=24h

min/max: 1.0E+001/1.0E+004

POES\_mapGsum\_05

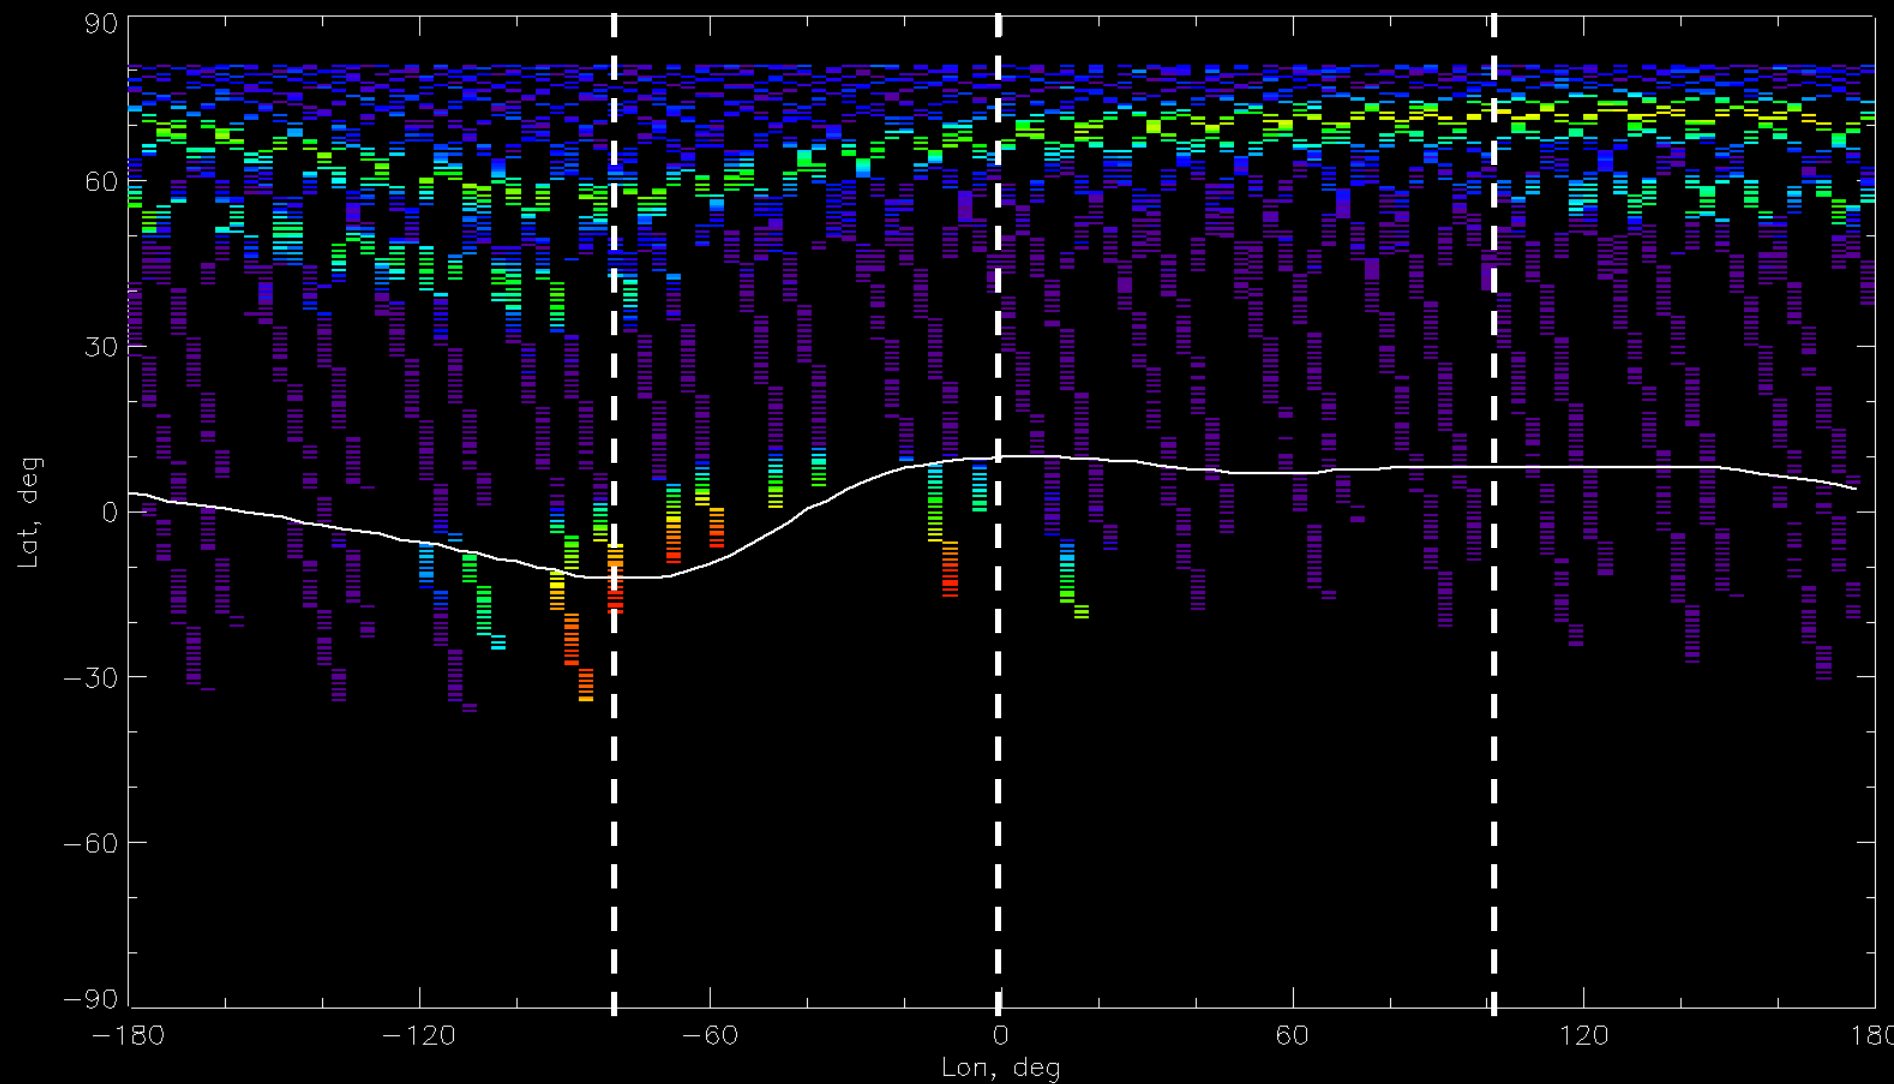

POES e &gt; 100 keV PA=90 avr 2010/06/12 0h - dt=24h

min/max: 1.0E+003/1.0E+006

POES\_mapGsum\_05

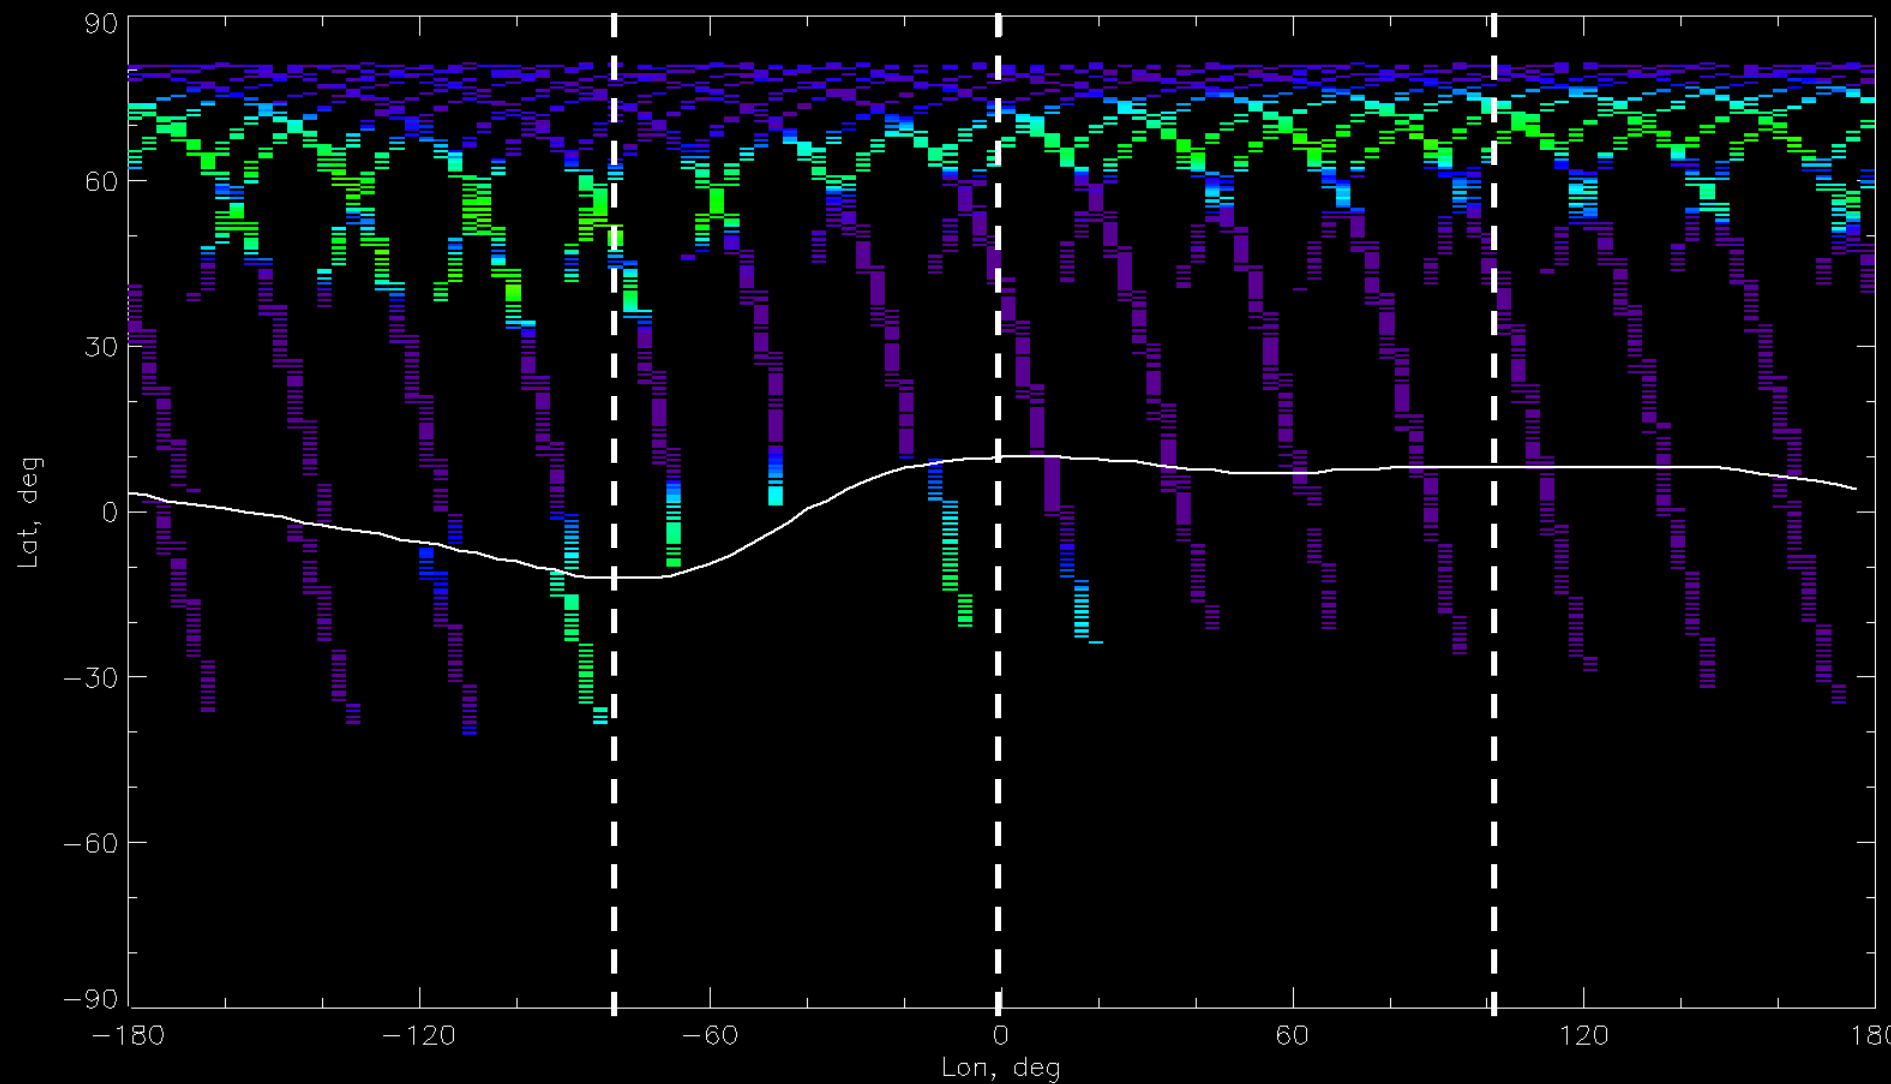

POES e &gt; 100 keV PA=90 avr 2011/06/28 6h - dt=24h

min/max: 1.0E+003/1.0E+006

POES\_mapGsum\_05

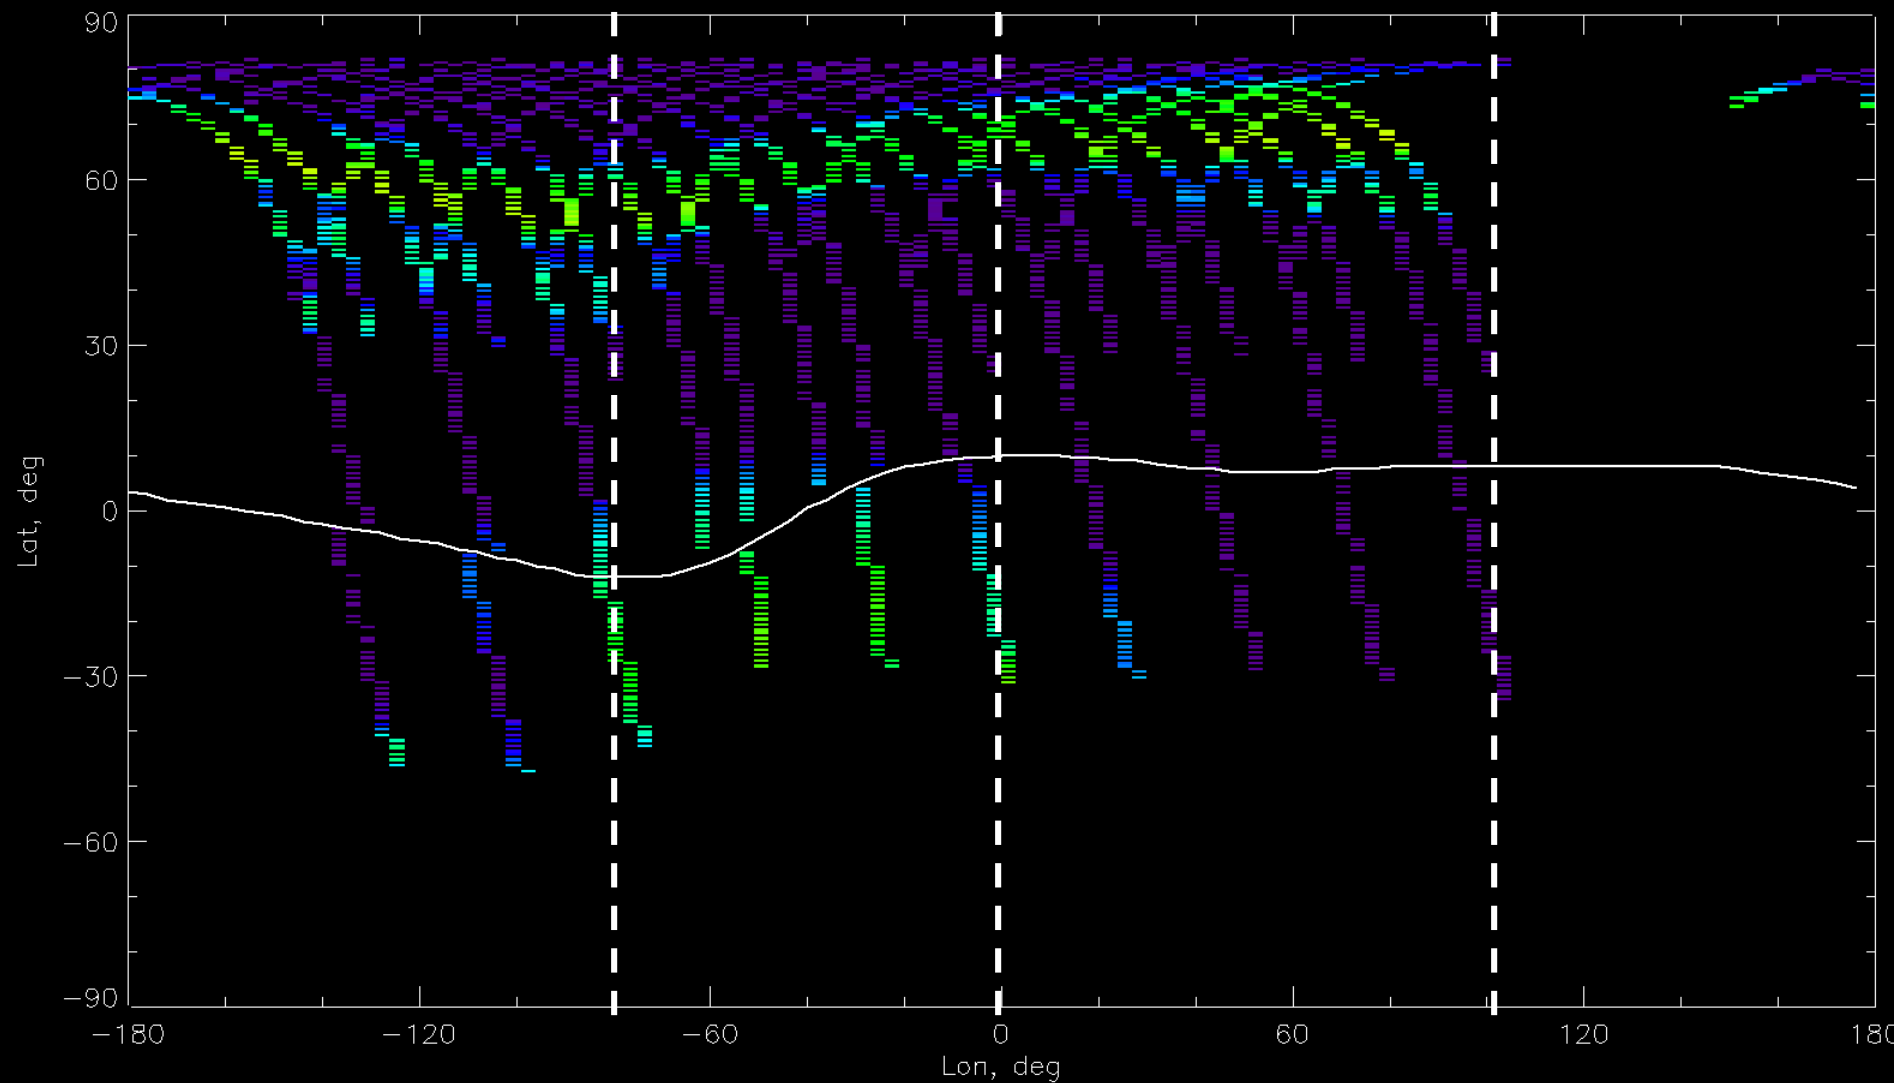

POES e &gt; 100 keV PA=90 avr 2012/06/15 0h - dt=24h

min/max: 1.0E+003/1.0E+006

POES\_mapGsum\_05

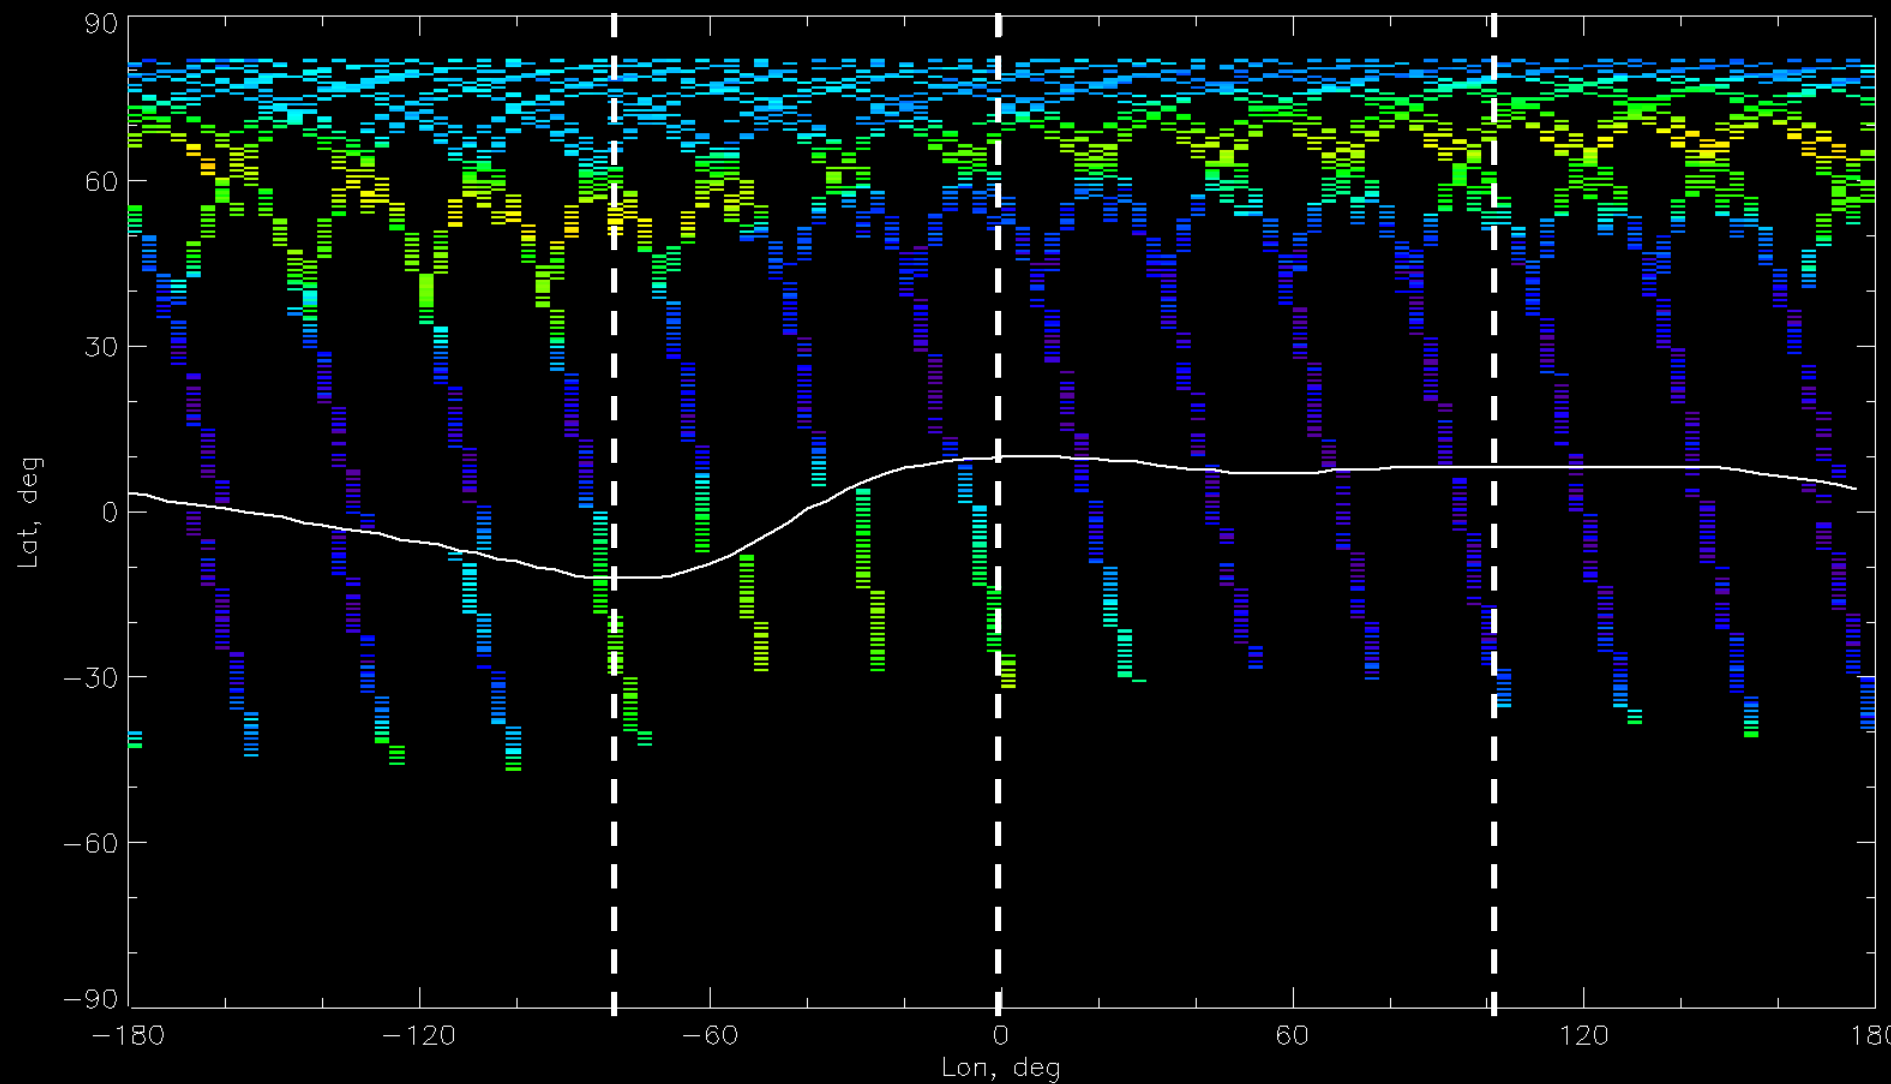

POES e &gt; 100 keV PA=90 avr 2013/06/16 0h - dt=24h

min/max: 1.0E+003/1.0E+006

POES\_mapGsum\_05

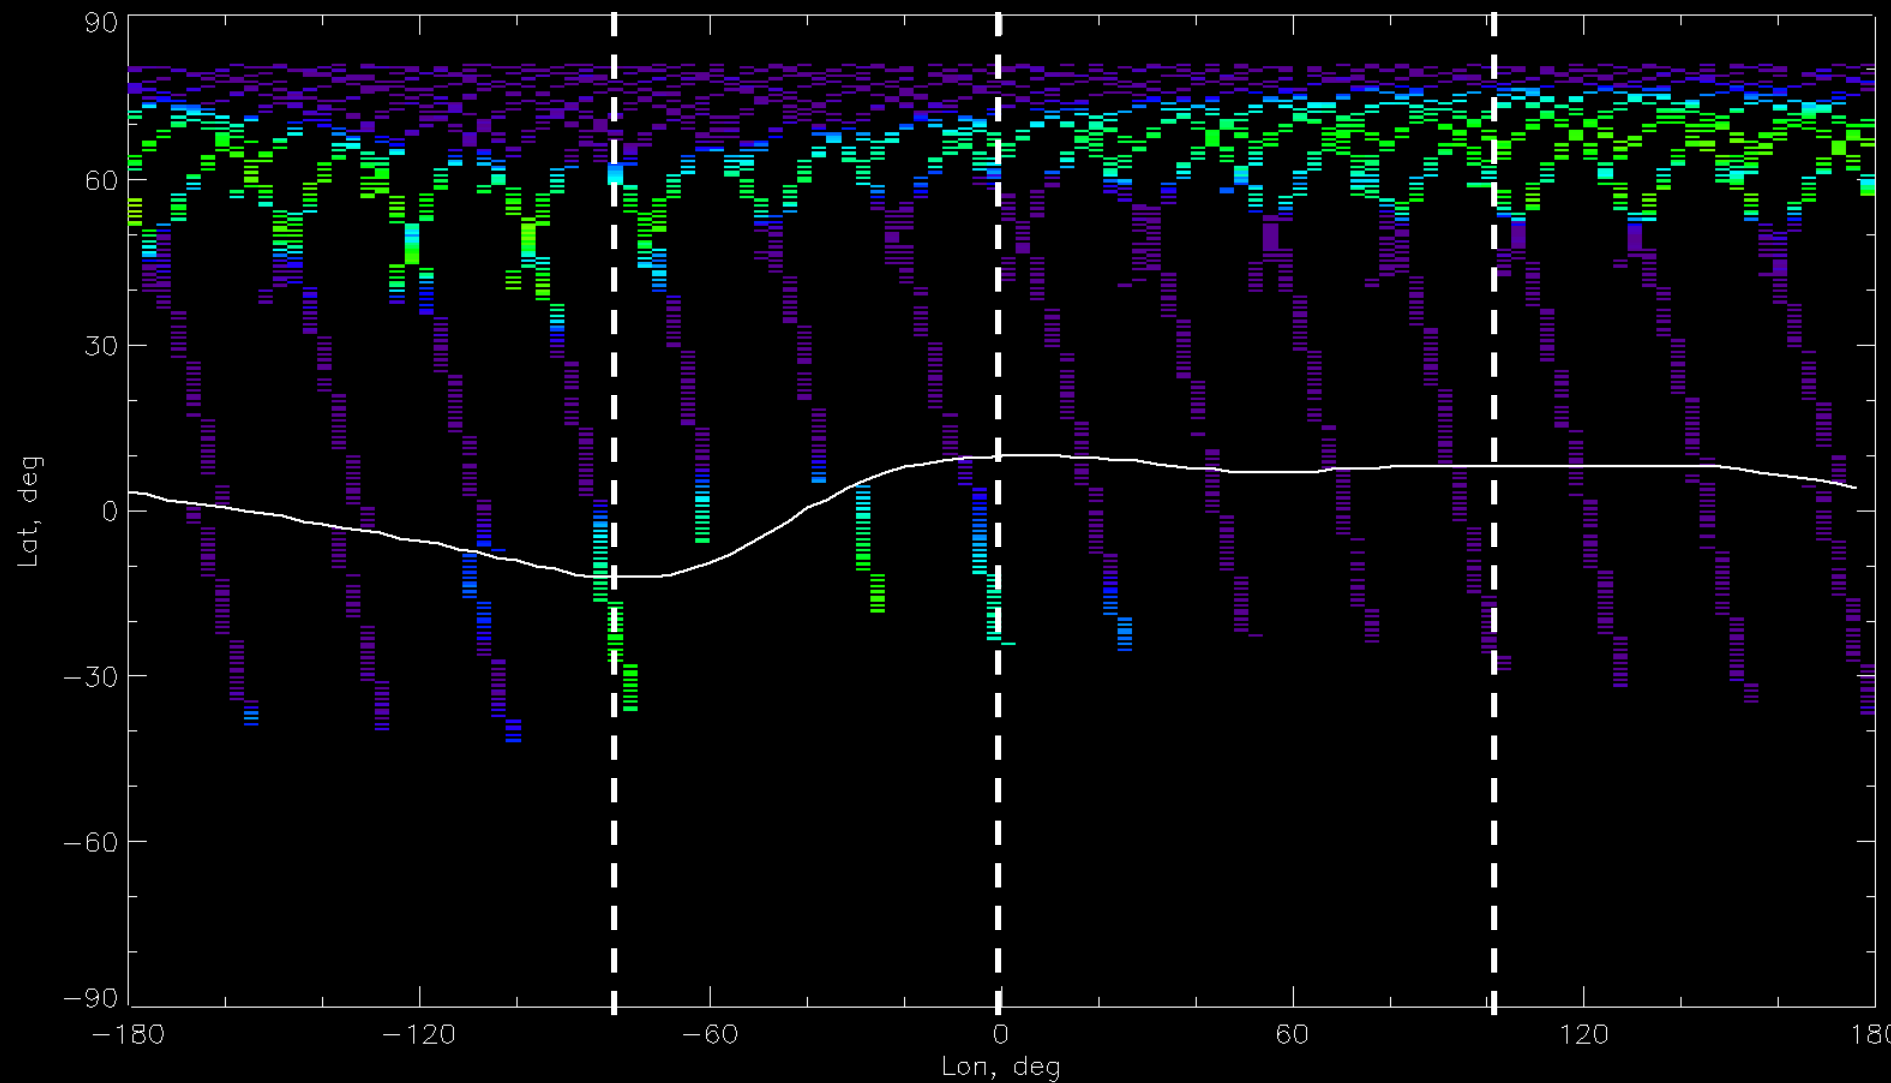

POES e &gt; 130 keV PA=90 avr 2014/06/01 0h - dt=36h

min/max: 1.0E+001/1.0E+006

POES\_mapGsum\_05

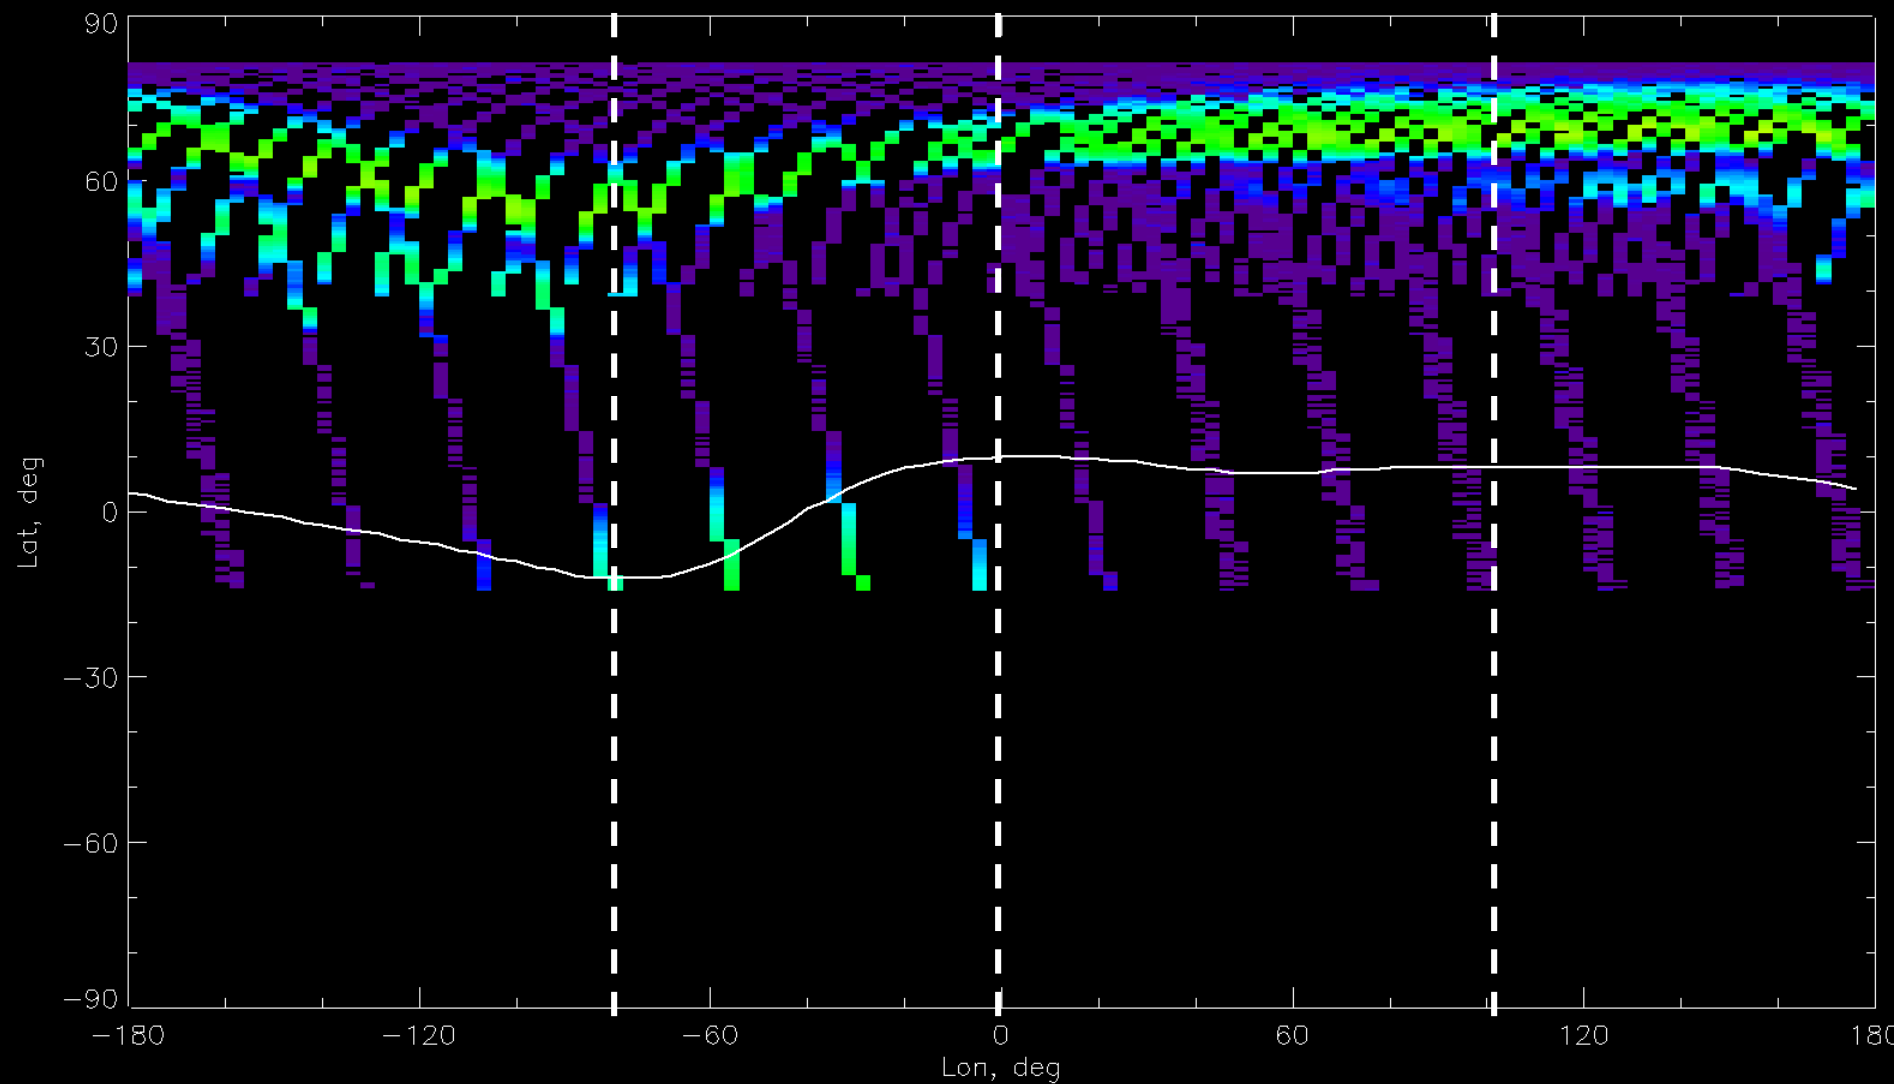

POES e &gt; 130 keV PA=90 avr 2015/06/04 0h - dt=24h

min/max: 1.0E+001/1.0E+006

POES\_mapGsum\_05

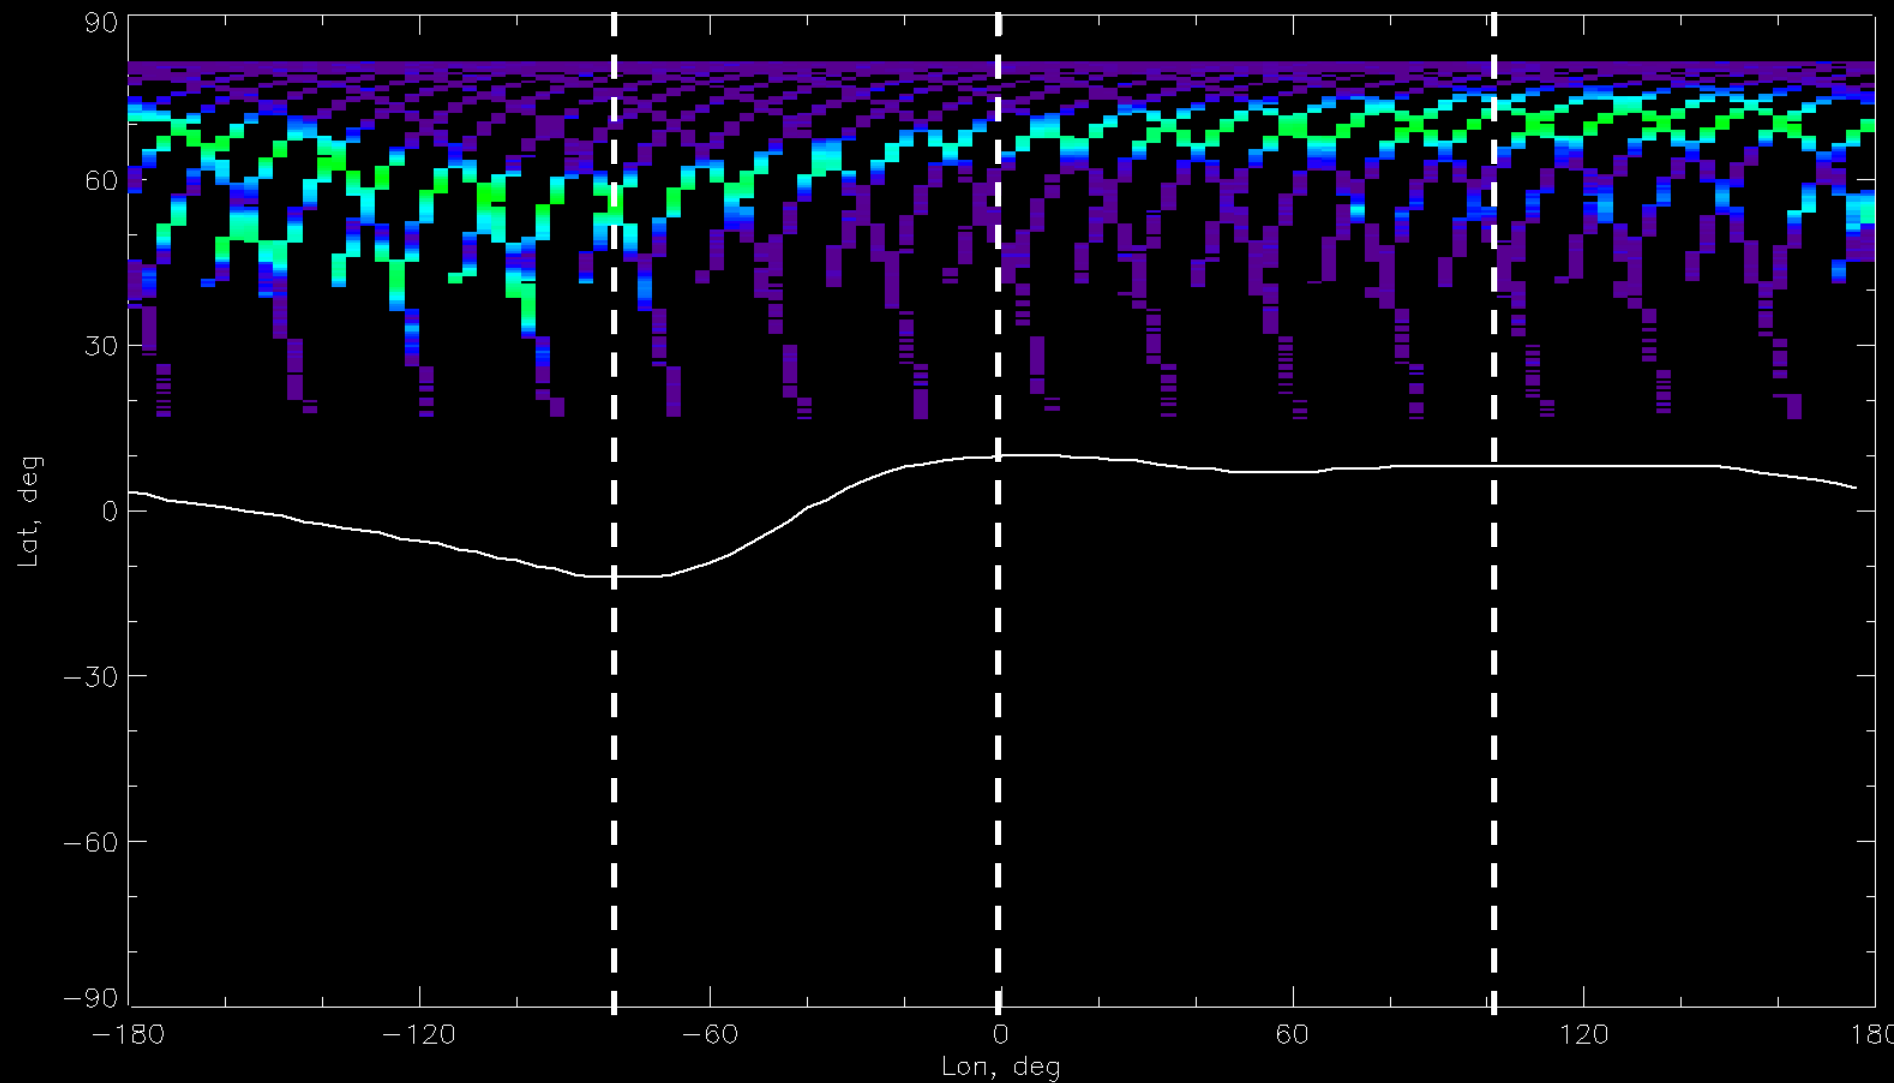



POES e &gt; 100 keV PA=90 avr 2016/06/03 0h - dt=24h

min/max: 1.0E+003/1.0E+006

POES\_mapGsum\_05

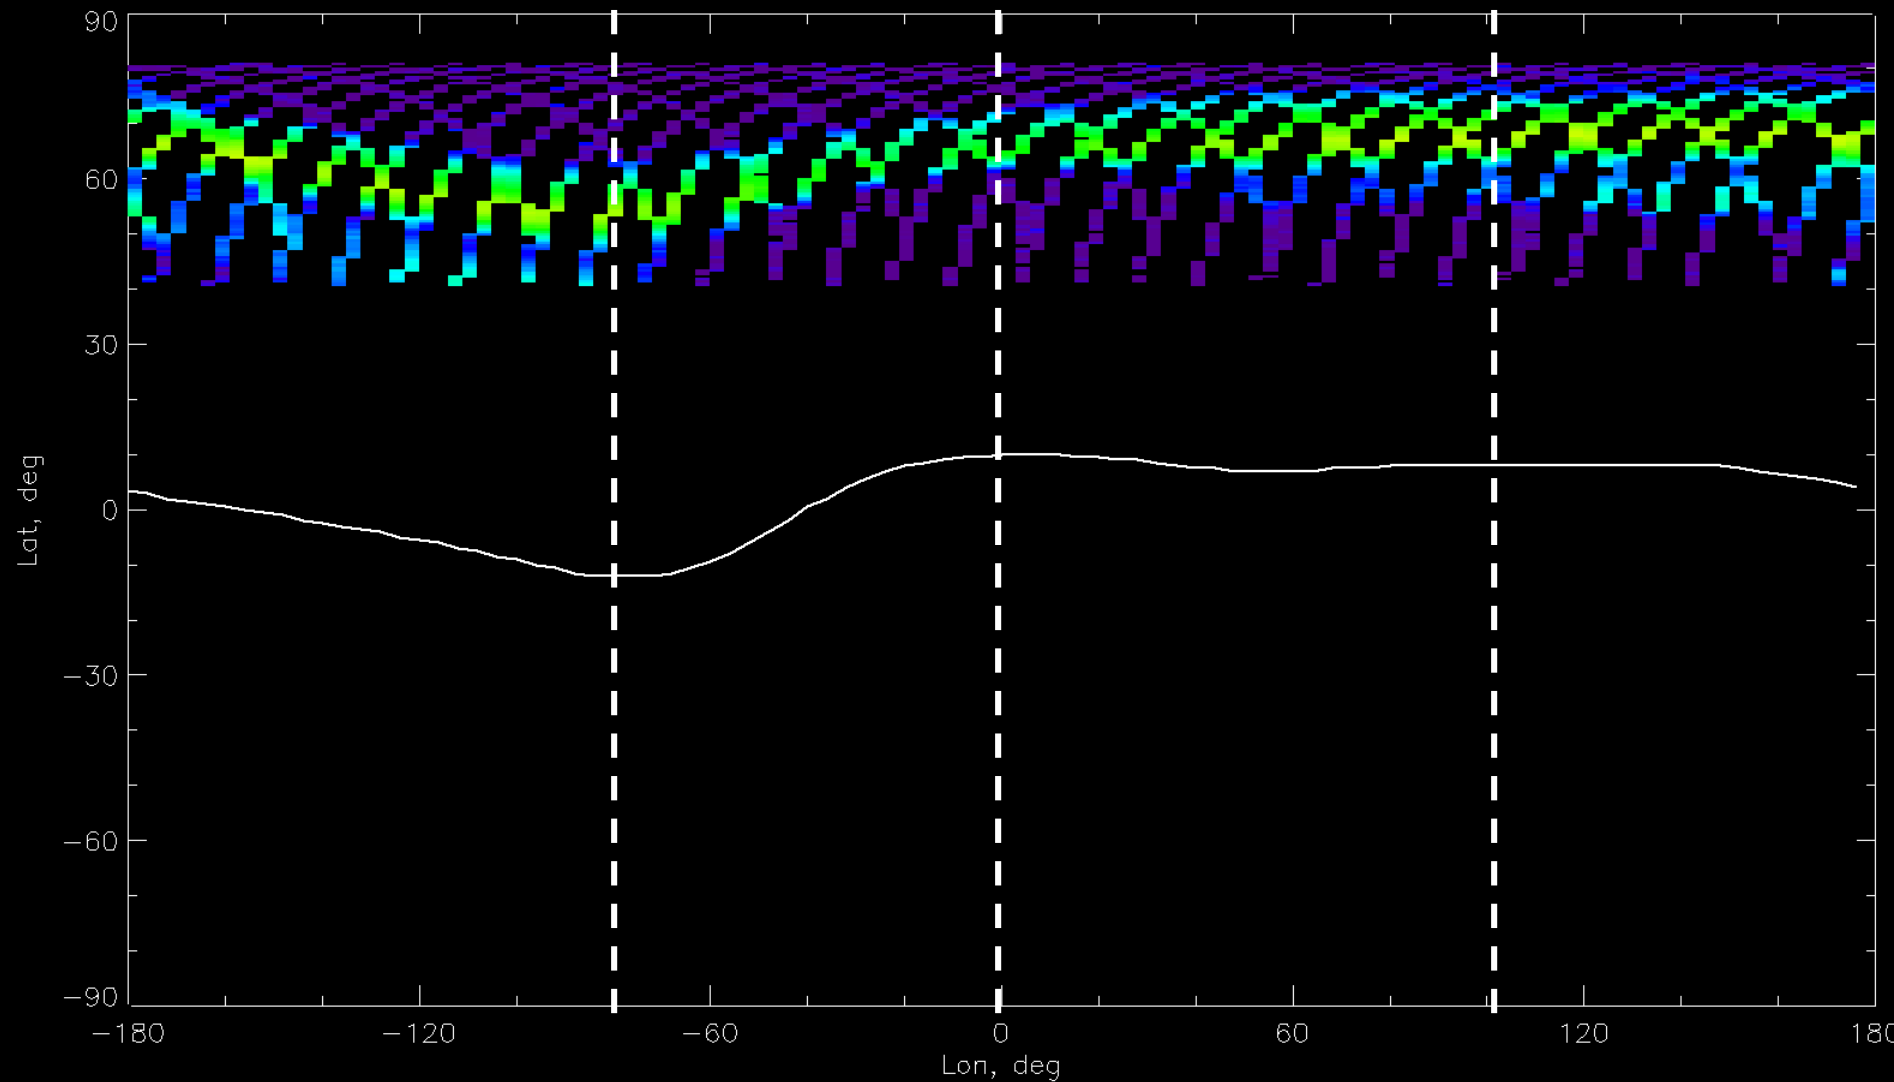

# Set map100

POES e > 130 keV PA=90 avr 2017/06/09 6h - dt=24h

min/max: 1.0E+002/1.0E+005

POES\_mapGsum\_05

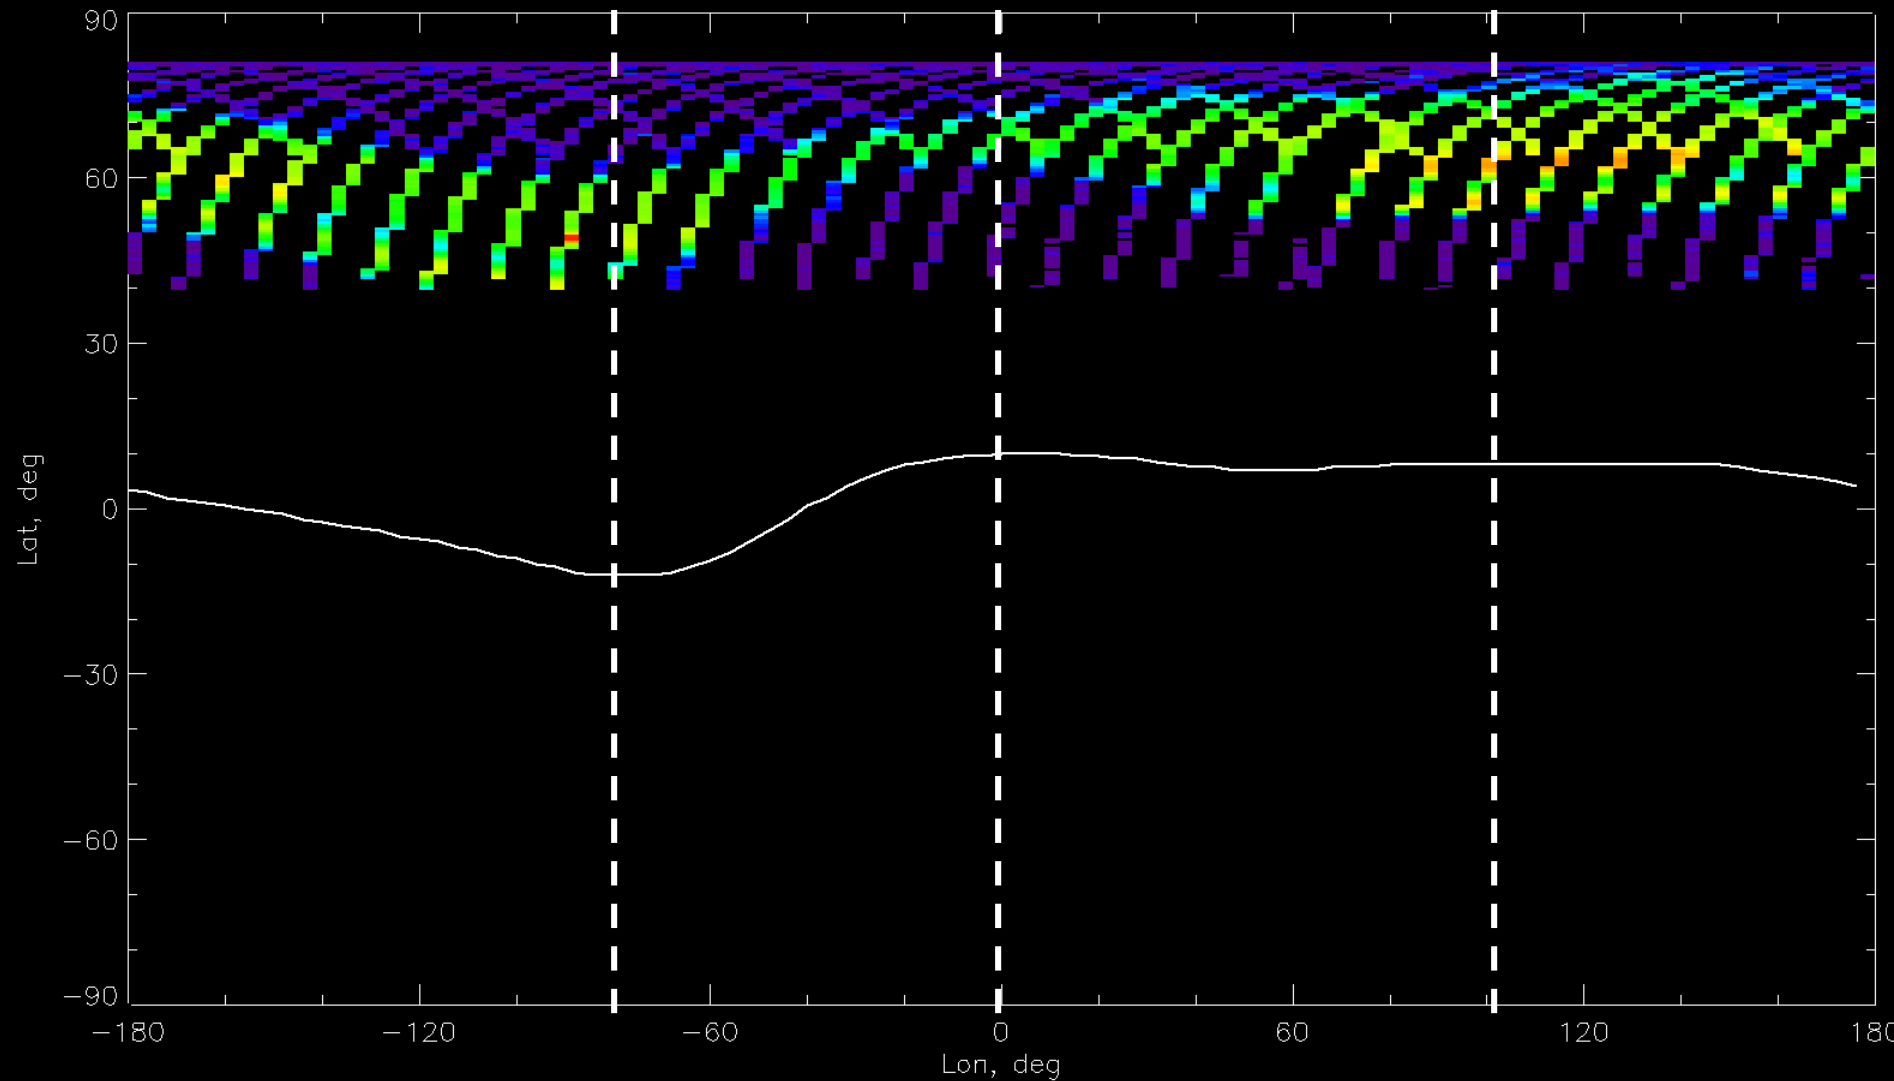

POES e &gt; 100 keV PA=90 avr 2018/06/12 08h - dt=24h

min/max: 1.0E+003/1.0E+006

POES\_mapGsum\_05

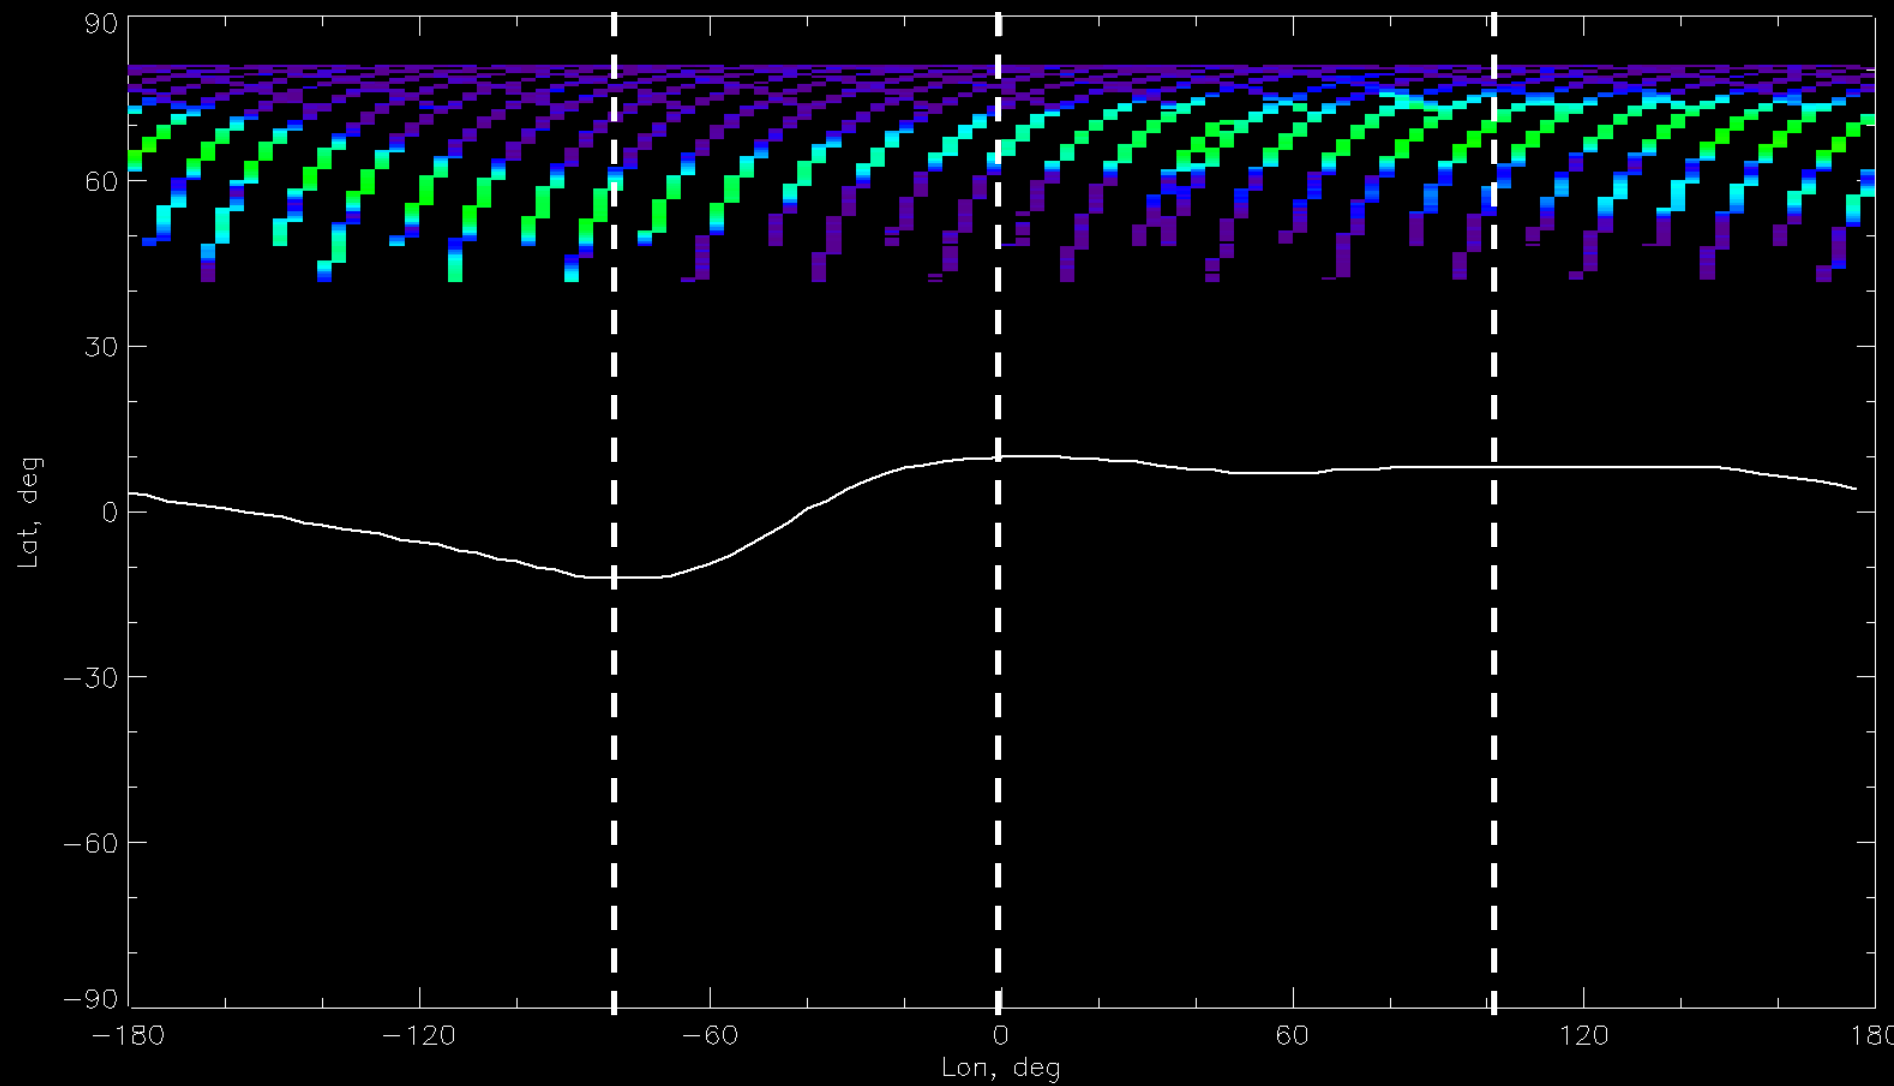

POES  $e > 300$  keV PA=90 avr 2001/08/29 0h - dt=24hmin/max:  $1.0E-001/1.0E+004$ 

POES\_mapGsum\_05

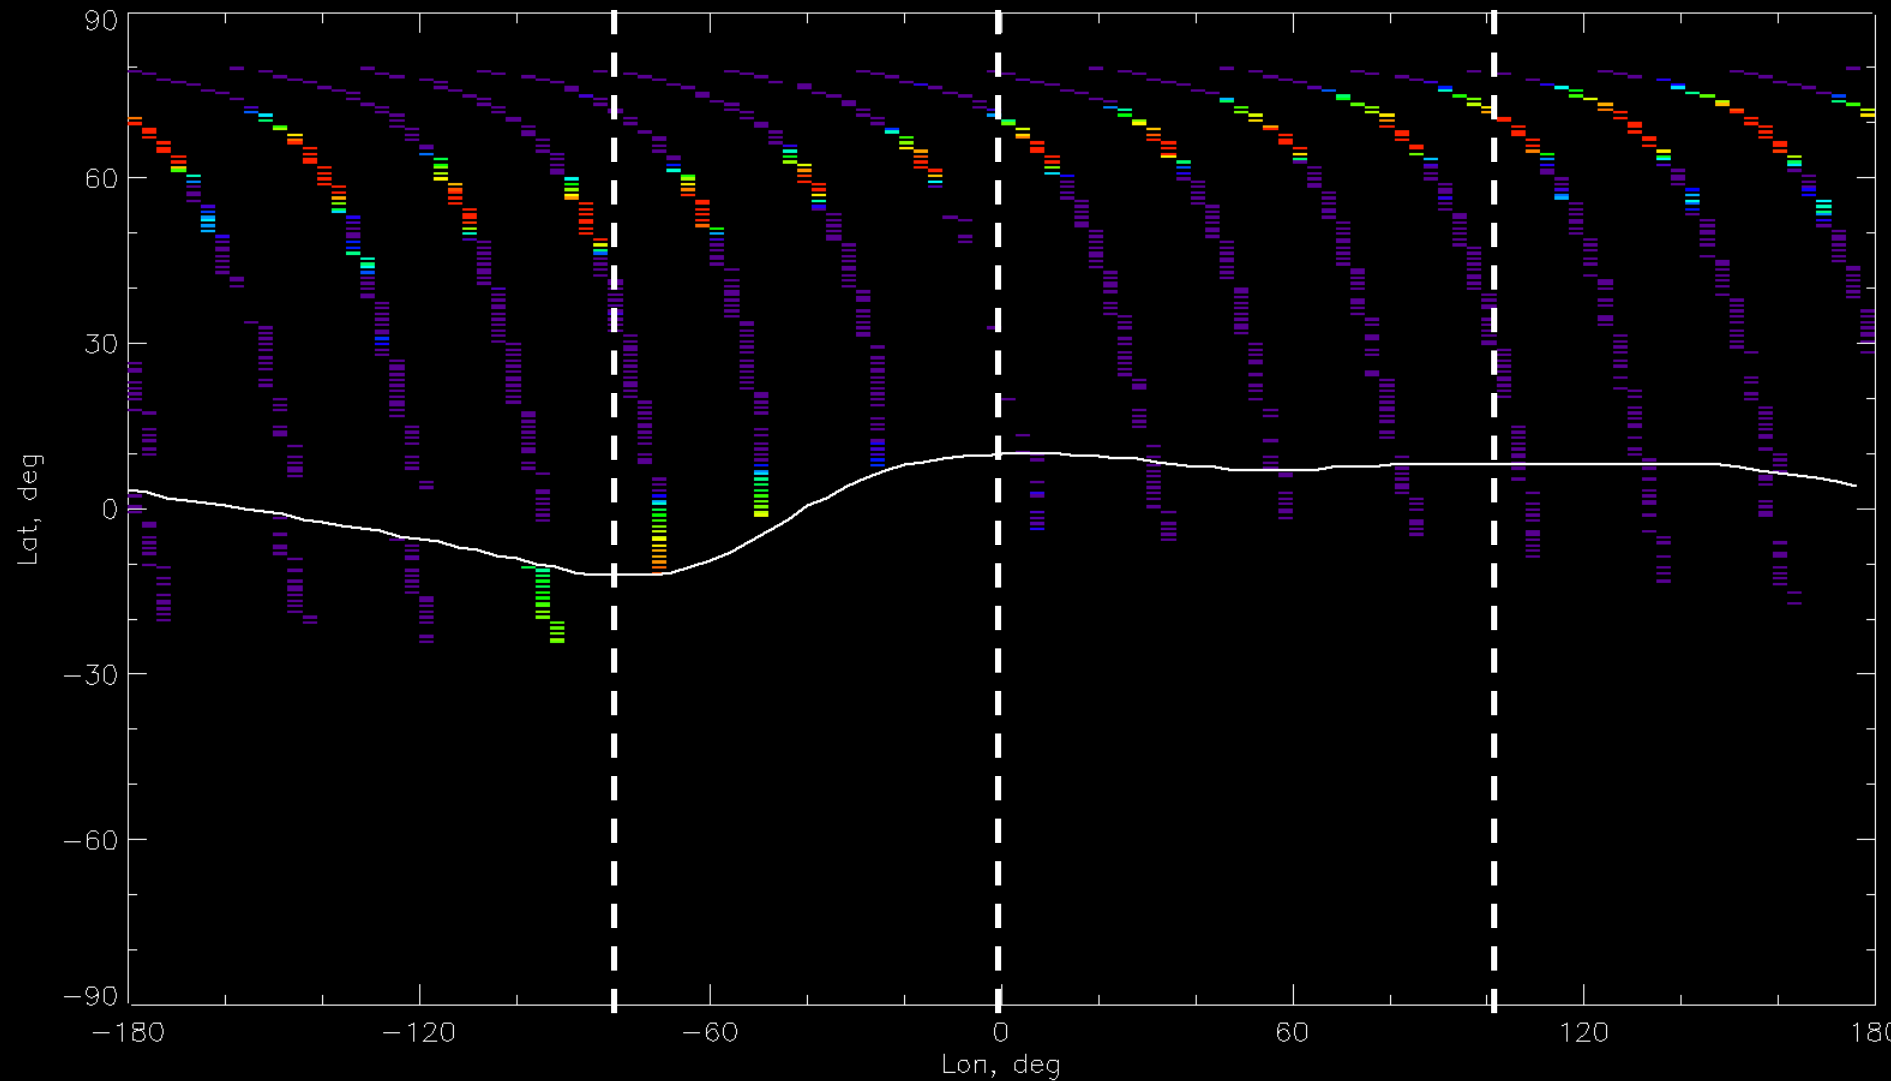

POES  $e > 300$  keV PA=90 avr 2002/08/28 0h - dt=24hmin/max:  $1.0E-001/1.0E+004$ 

POES\_mapGsum\_05

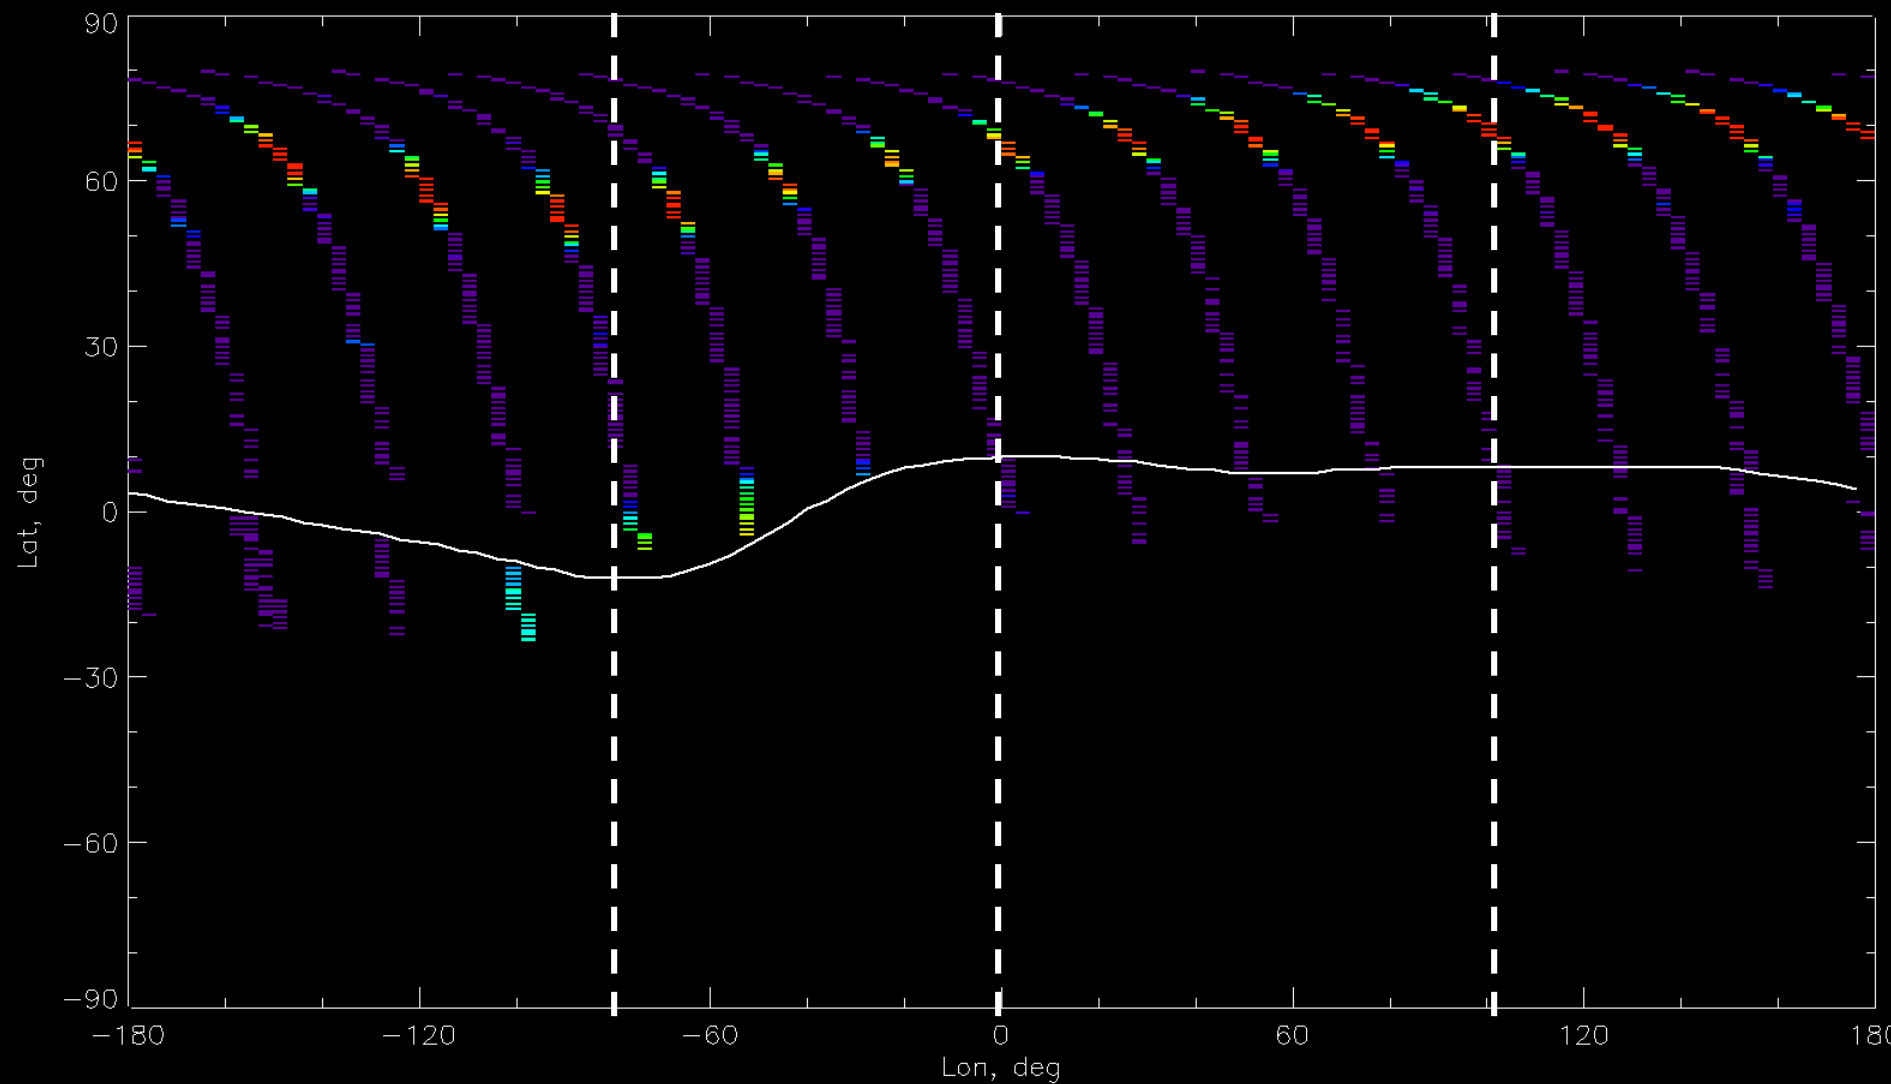

POES  $e > 300$  keV PA=90 avr 2004/08/24 12h - dt=24hmin/max:  $1.0E-001/1.0E+004$ 

POES\_mapGsum\_05

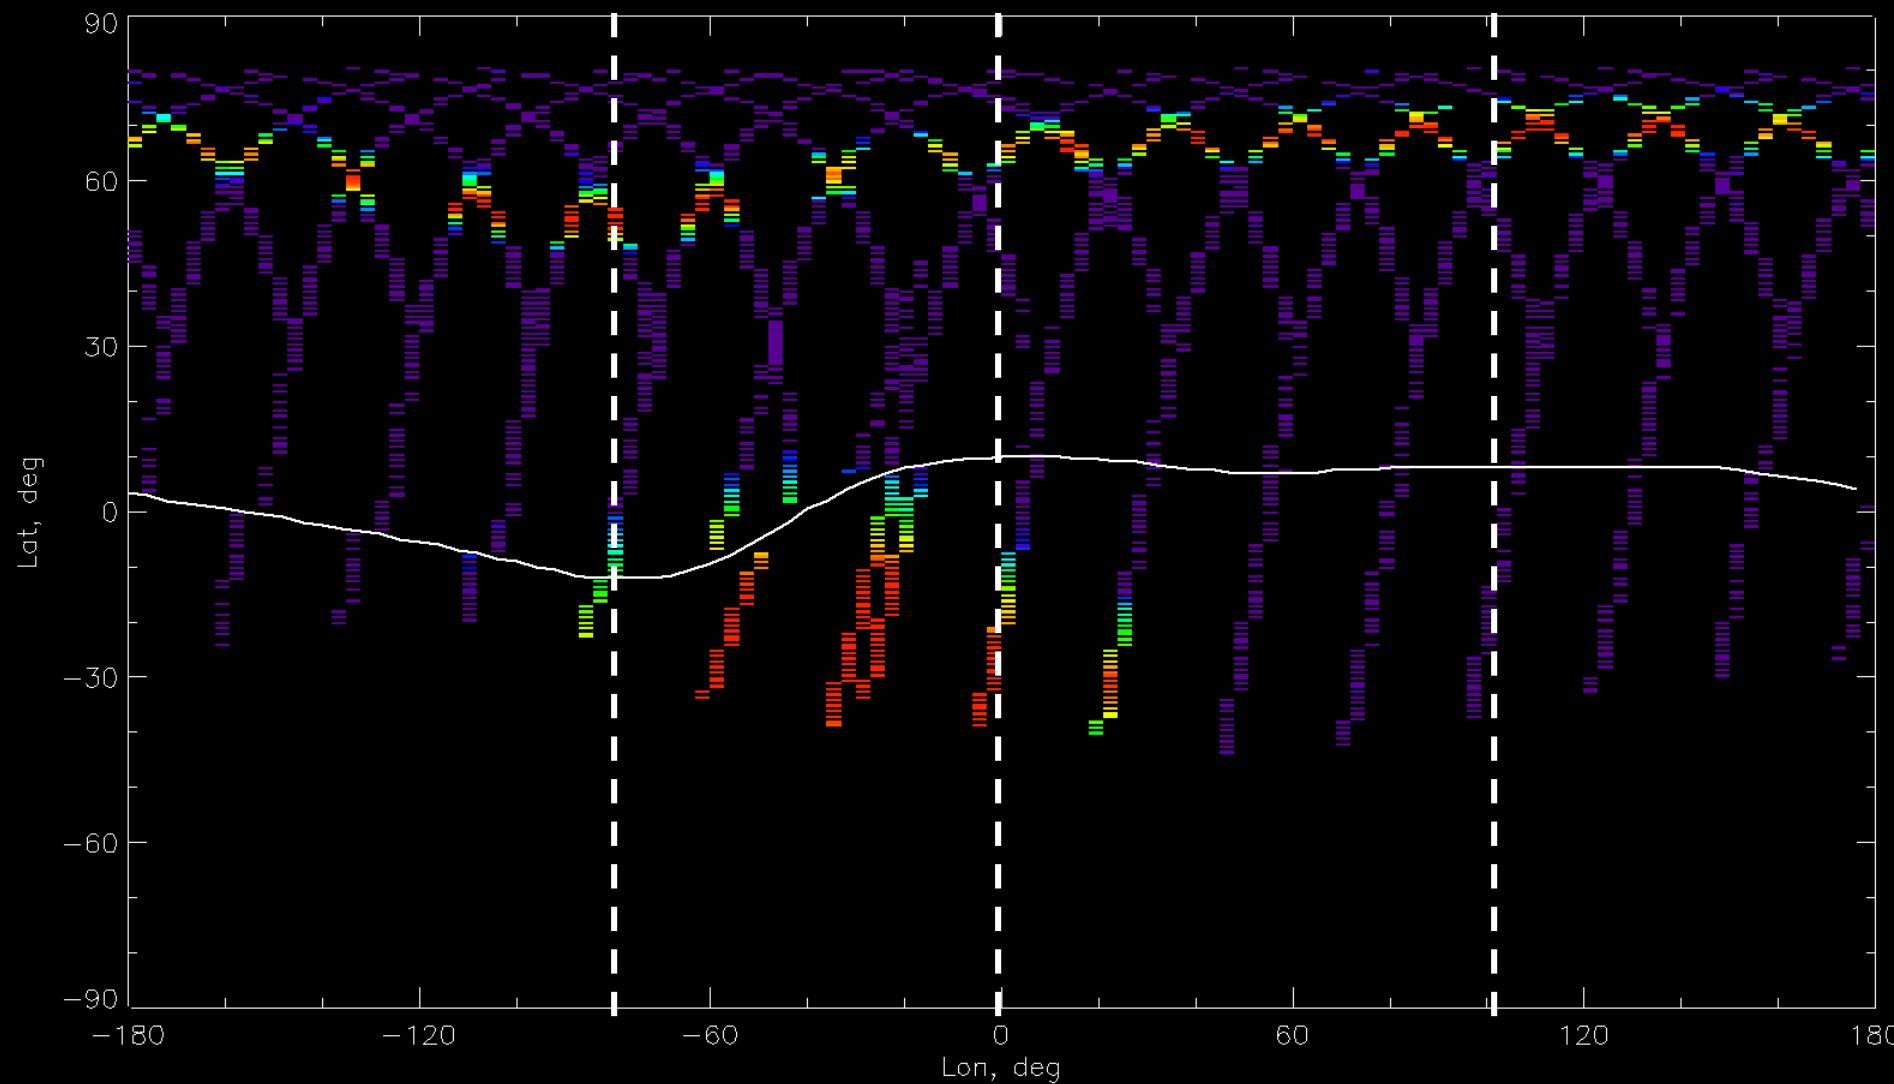

# Set map300

POES  $e > 300$  keV PA=90 avr 2005/08/21 0h - dt=18h

min/max:  $1.0E-001/1.0E+004$

POES\_mapGsum\_05

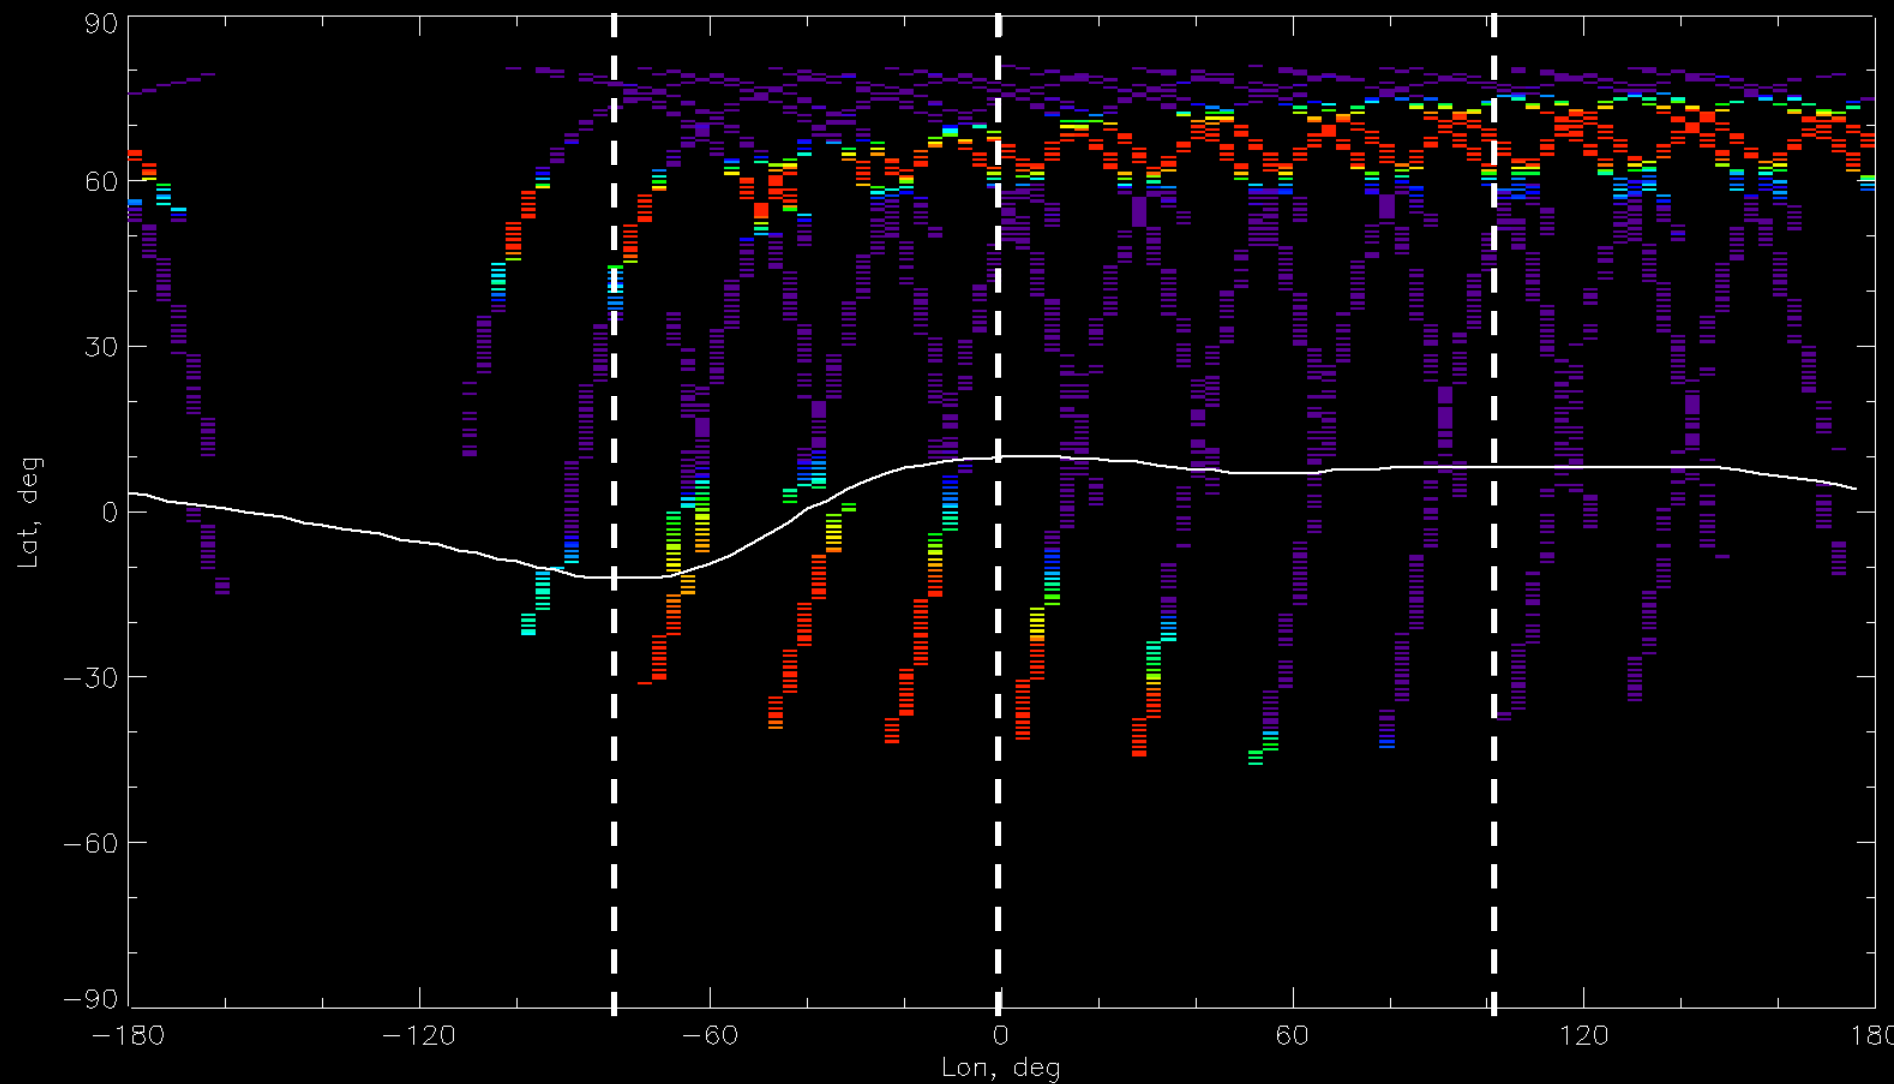

POES  $e > 300$  keV PA=90 avr 2006/08/23 0h - dt=24hmin/max:  $1.0E-001/1.0E+004$ 

POES\_mapGsum\_05

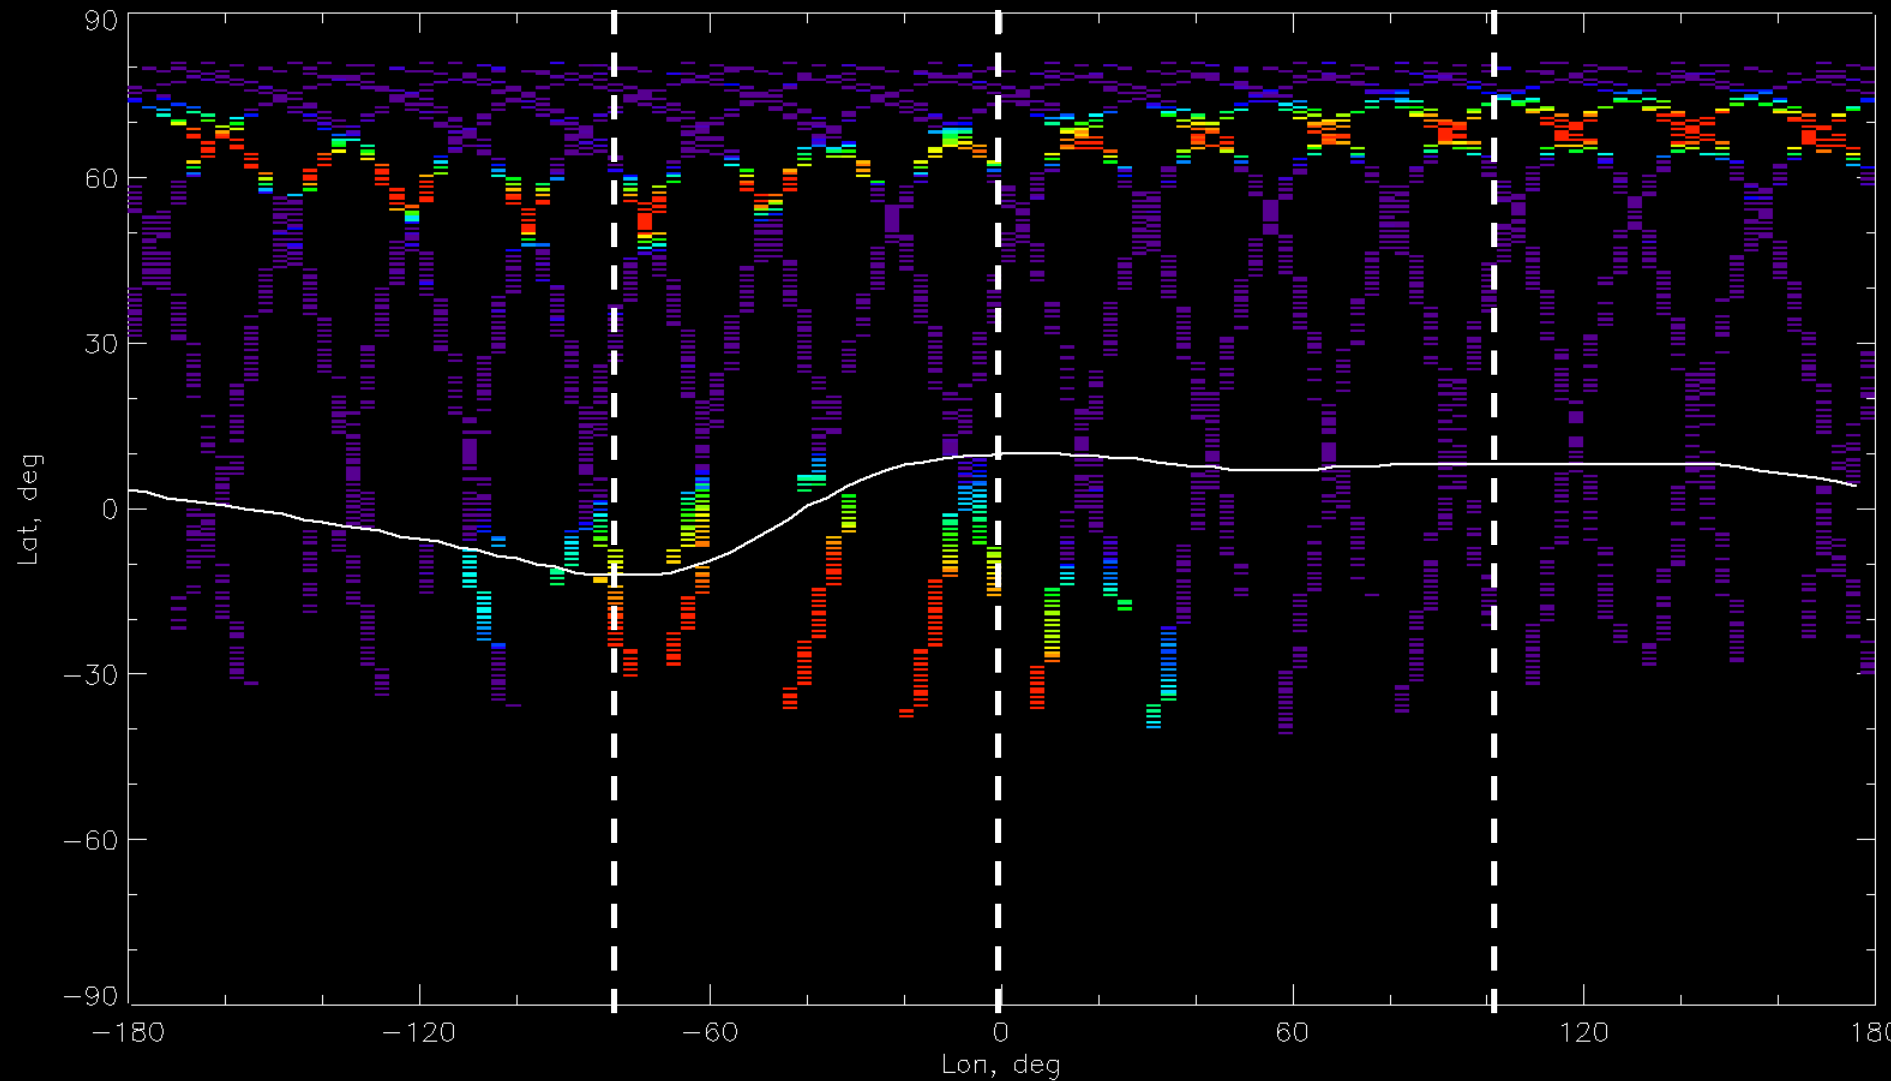



POES  $e > 300$  keV PA=90 avr 2008/08/13 0h - dt=24hmin/max:  $1.0E-001/1.0E+004$ 

POES\_mapGsum\_05

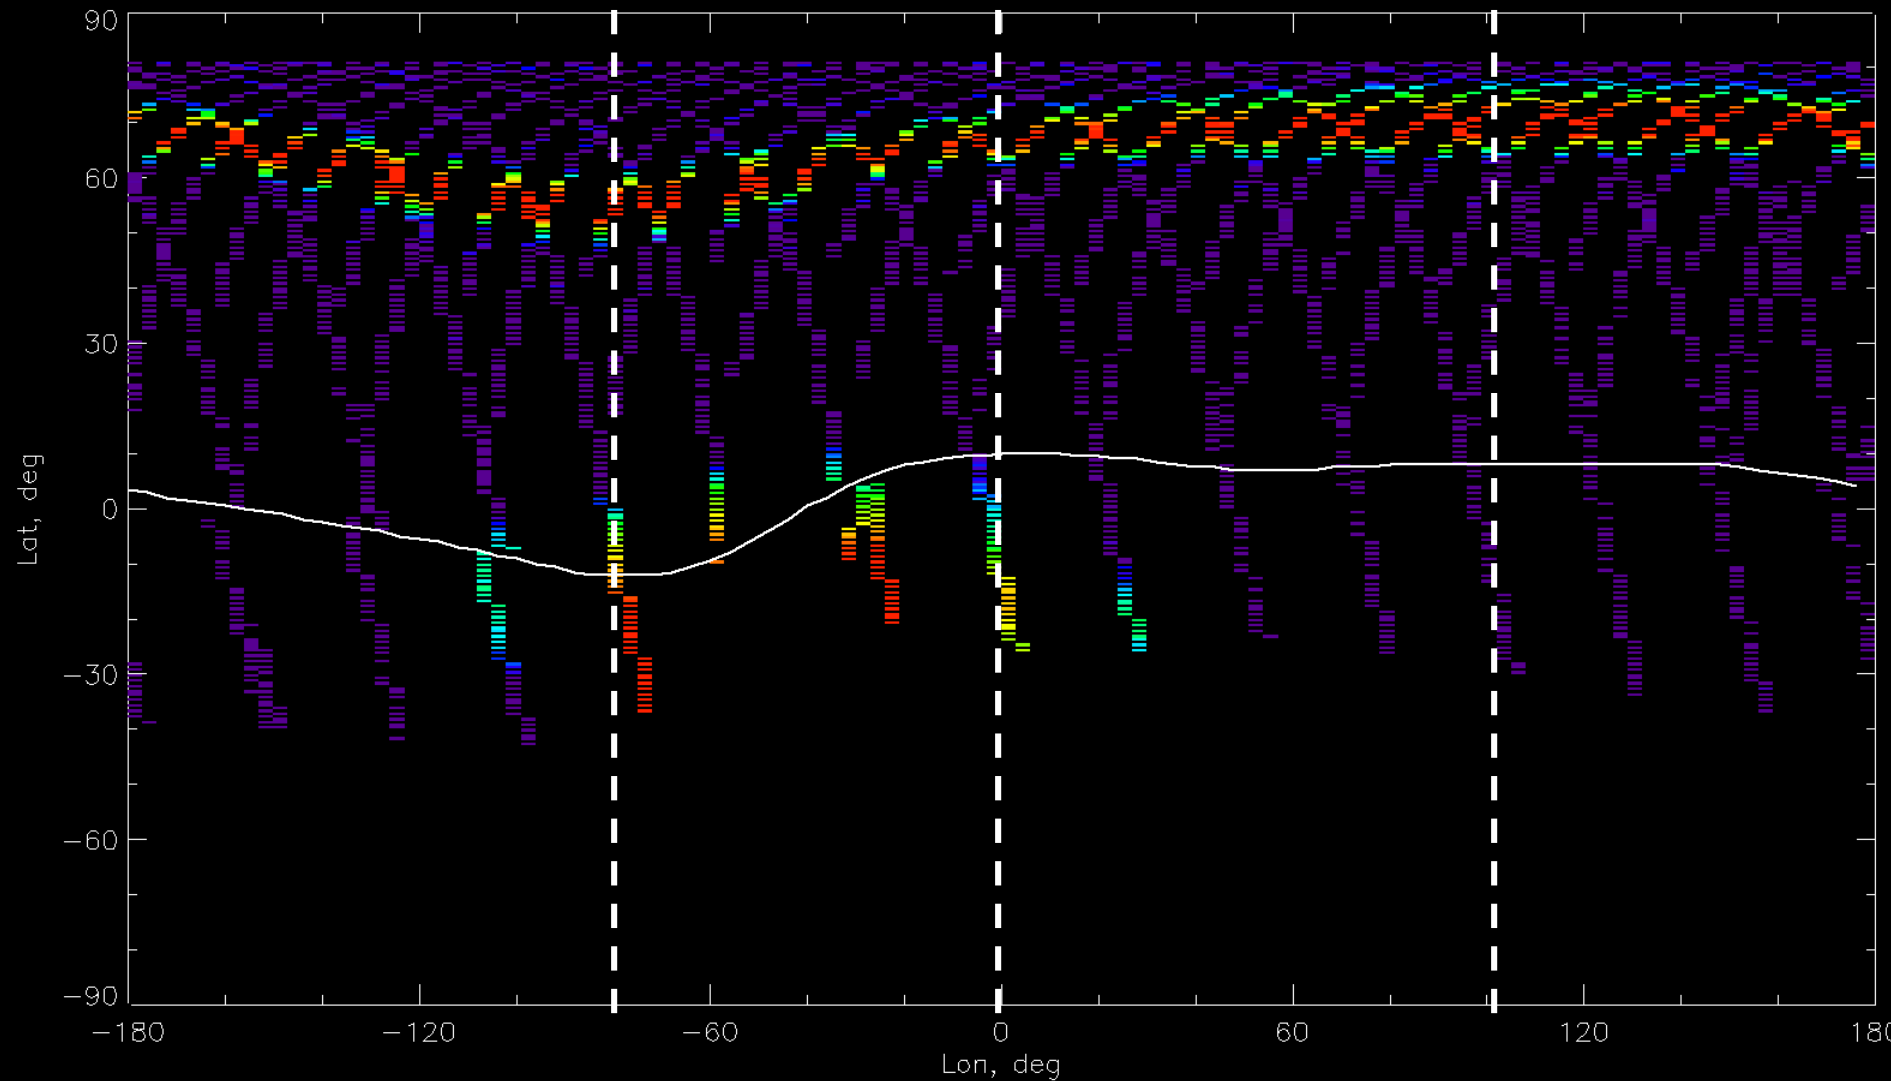

# Set map300

POES e>300 keV PA=90 avr 2009/08/17 0h - dt=24h

min/max: 1.0E-001/1.0E+004

POES\_mapGsum\_05

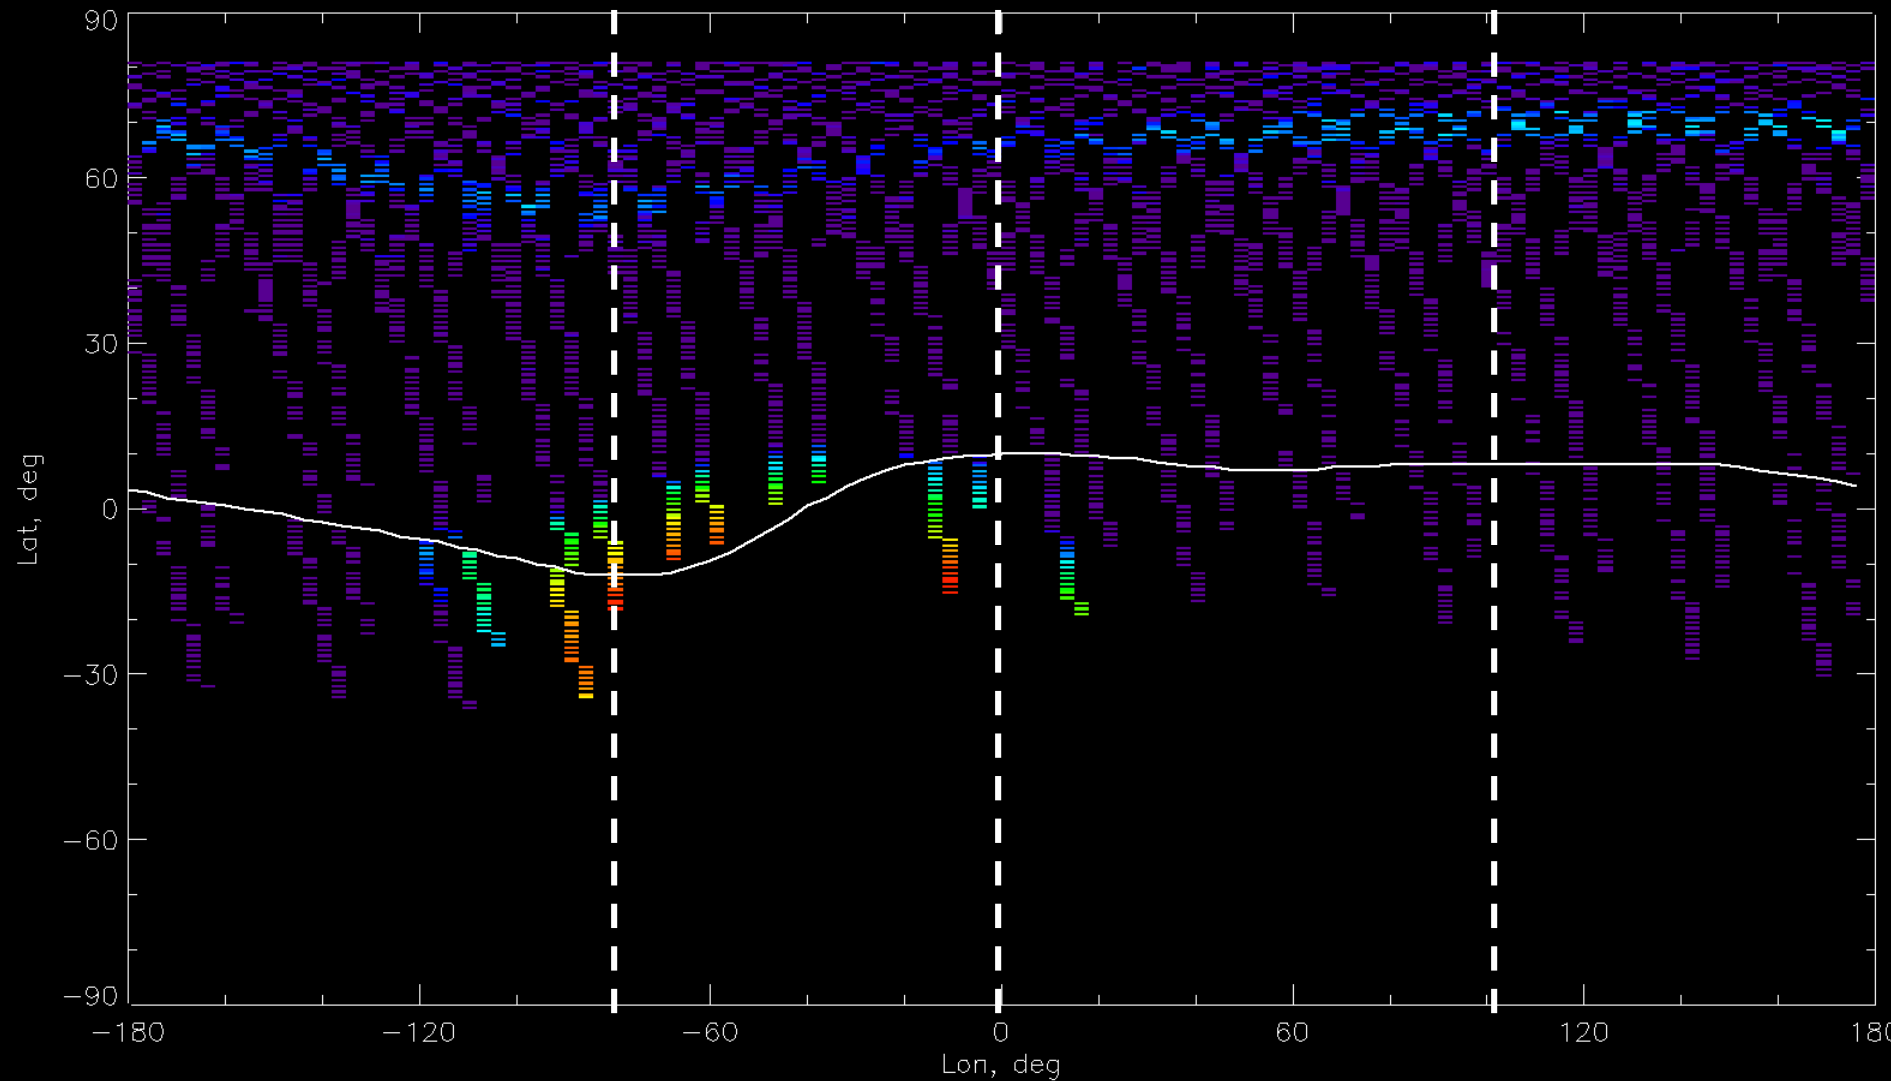

POES  $e > 300$  keV PA=90 avr 2010/08/12 0h - dt=24hmin/max:  $1.0E-001/1.0E+004$ 

POES\_mapGsum\_05

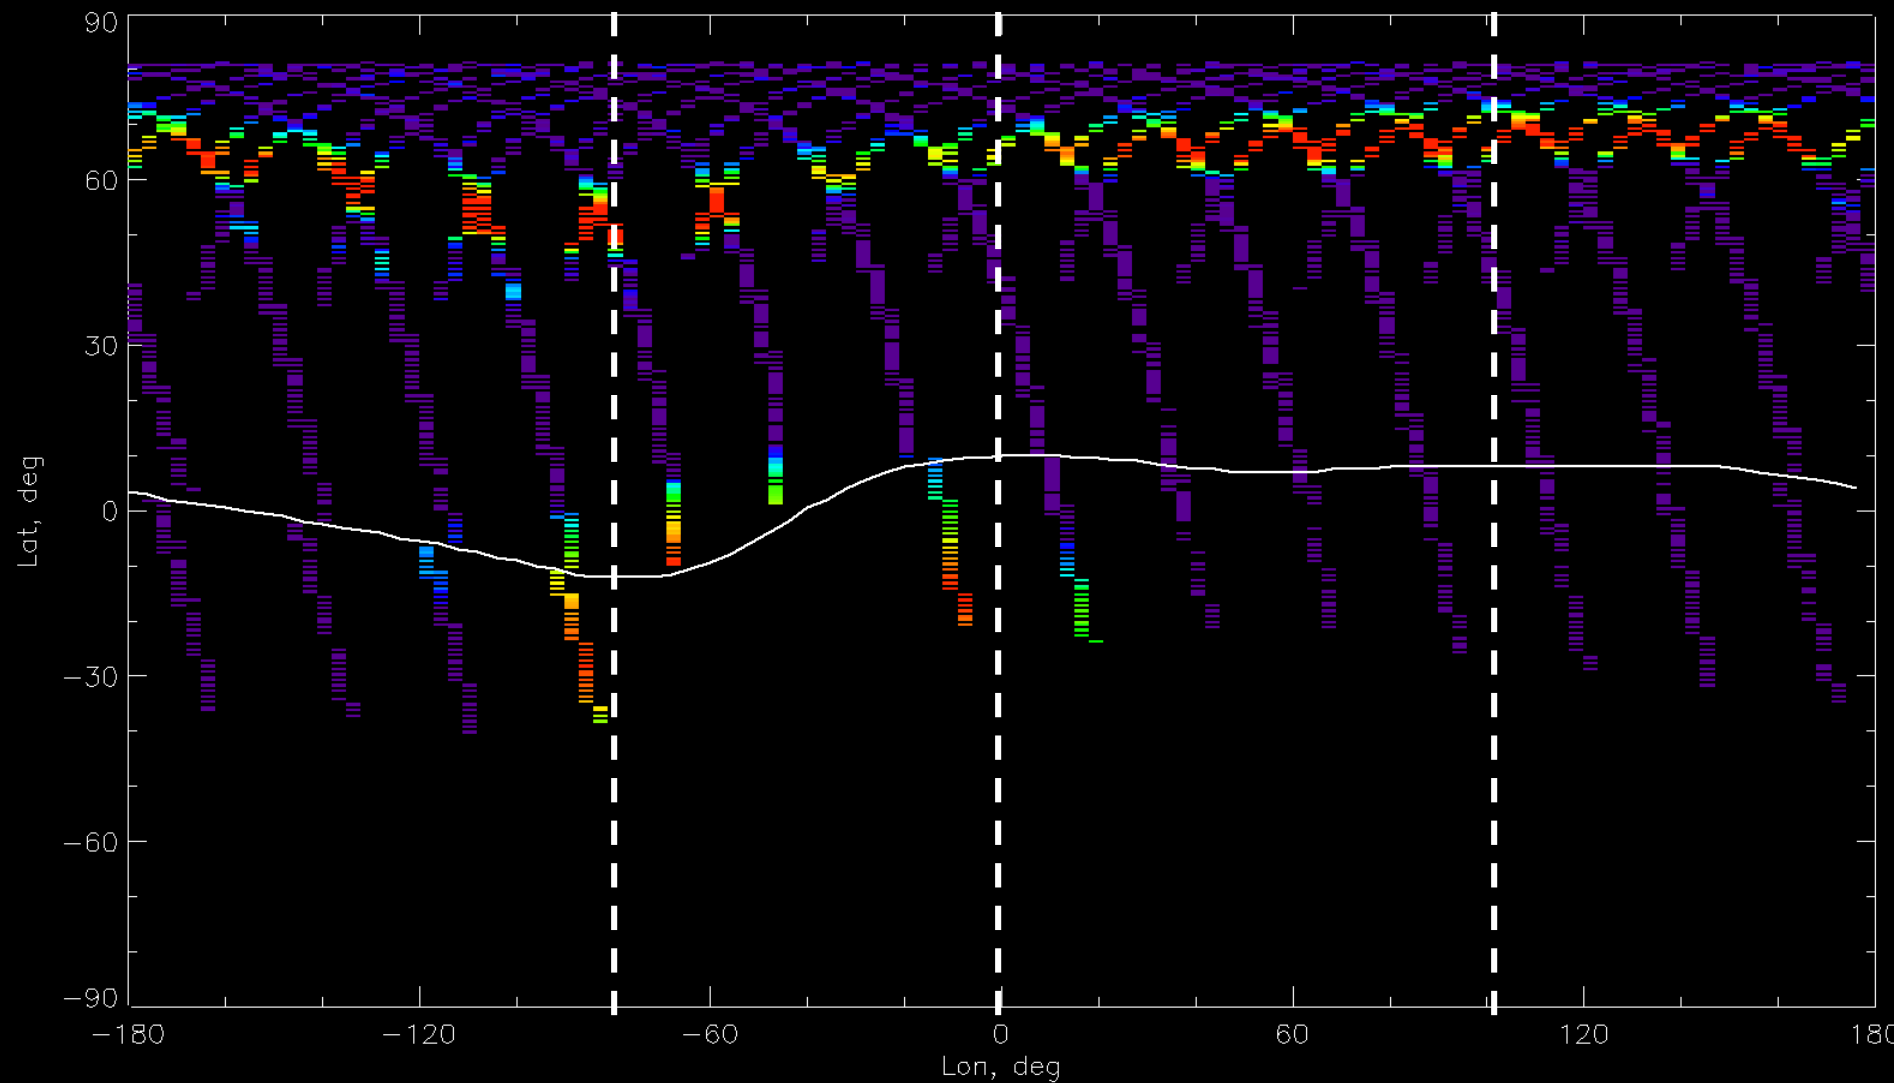

POES  $e > 300$  keV PA=90 avr 2011/08/28 6h - dt=24hmin/max:  $1.0E-001/1.0E+004$ 

POES\_mapGsum\_05

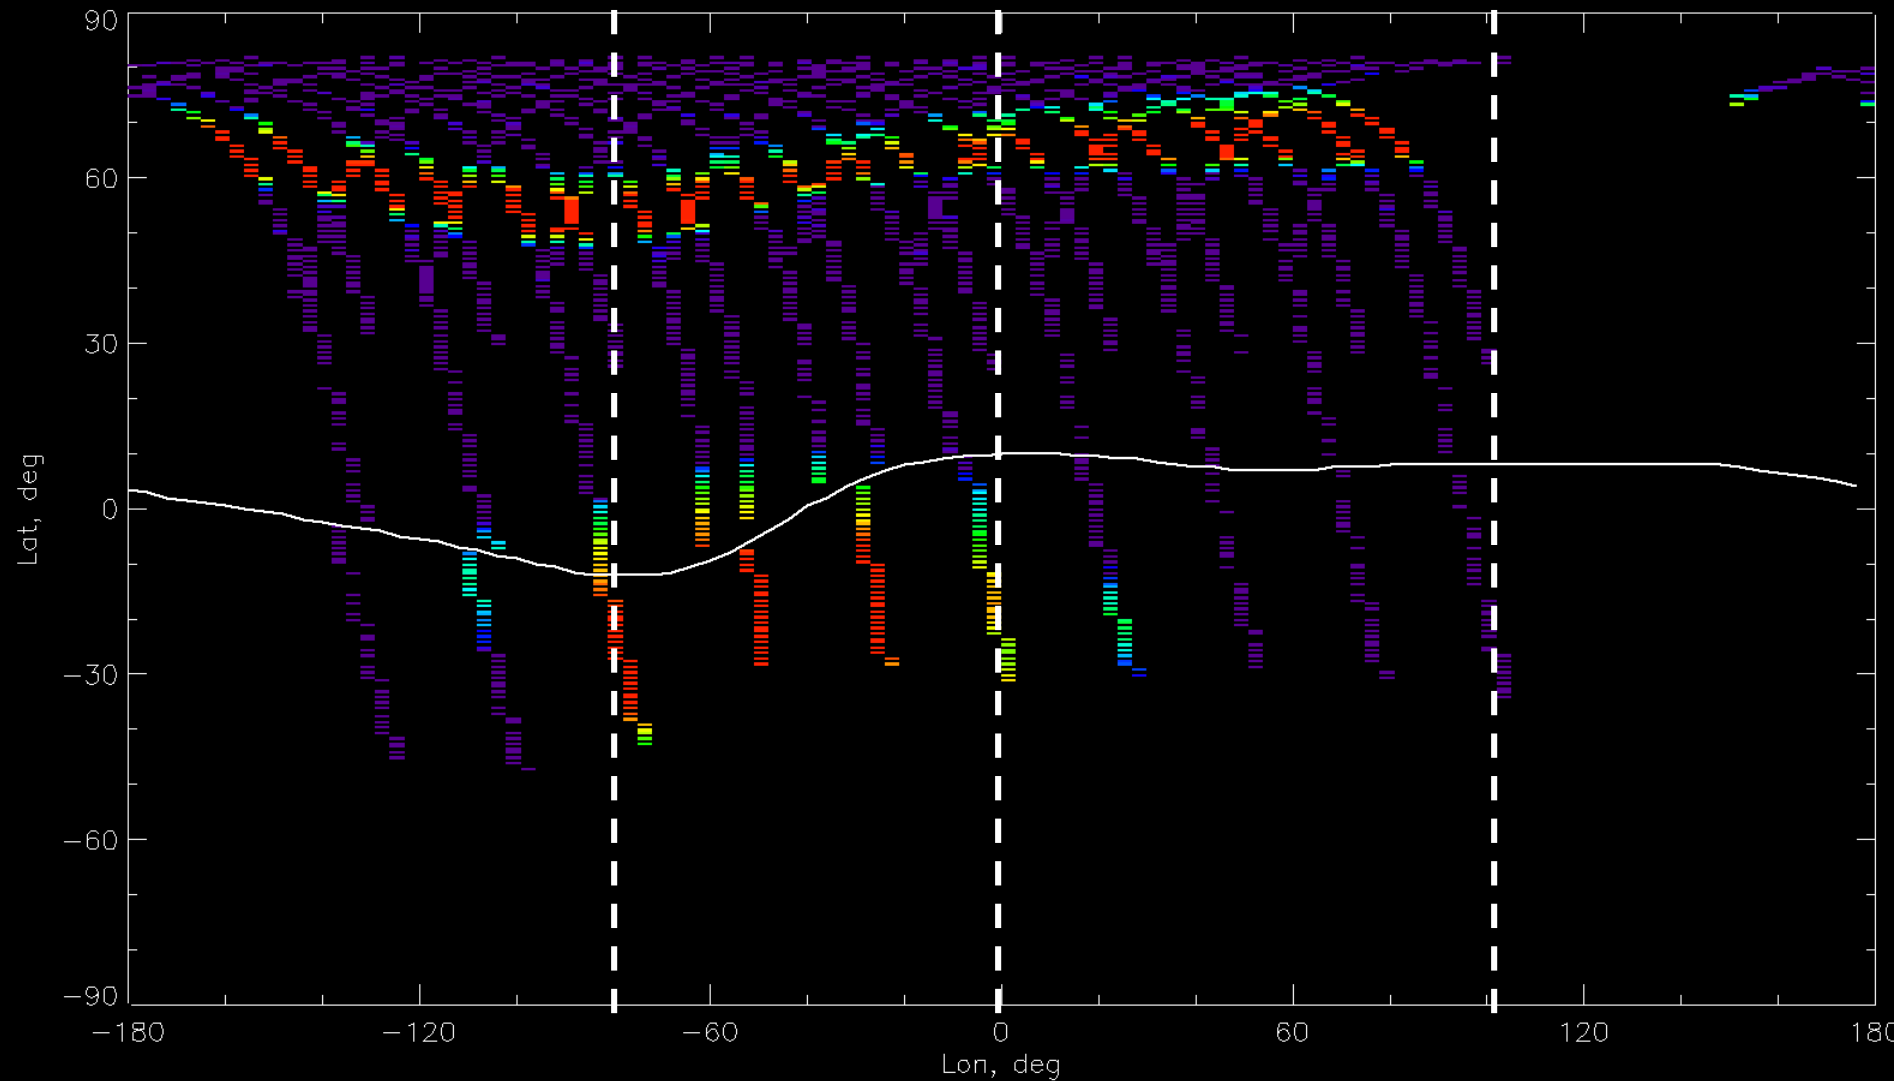

POES  $e > 300$  keV PA=90 avr 2012/08/15 0h - dt=24hmin/max:  $1.0E-001/1.0E+004$ 

POES\_mapGsum\_05

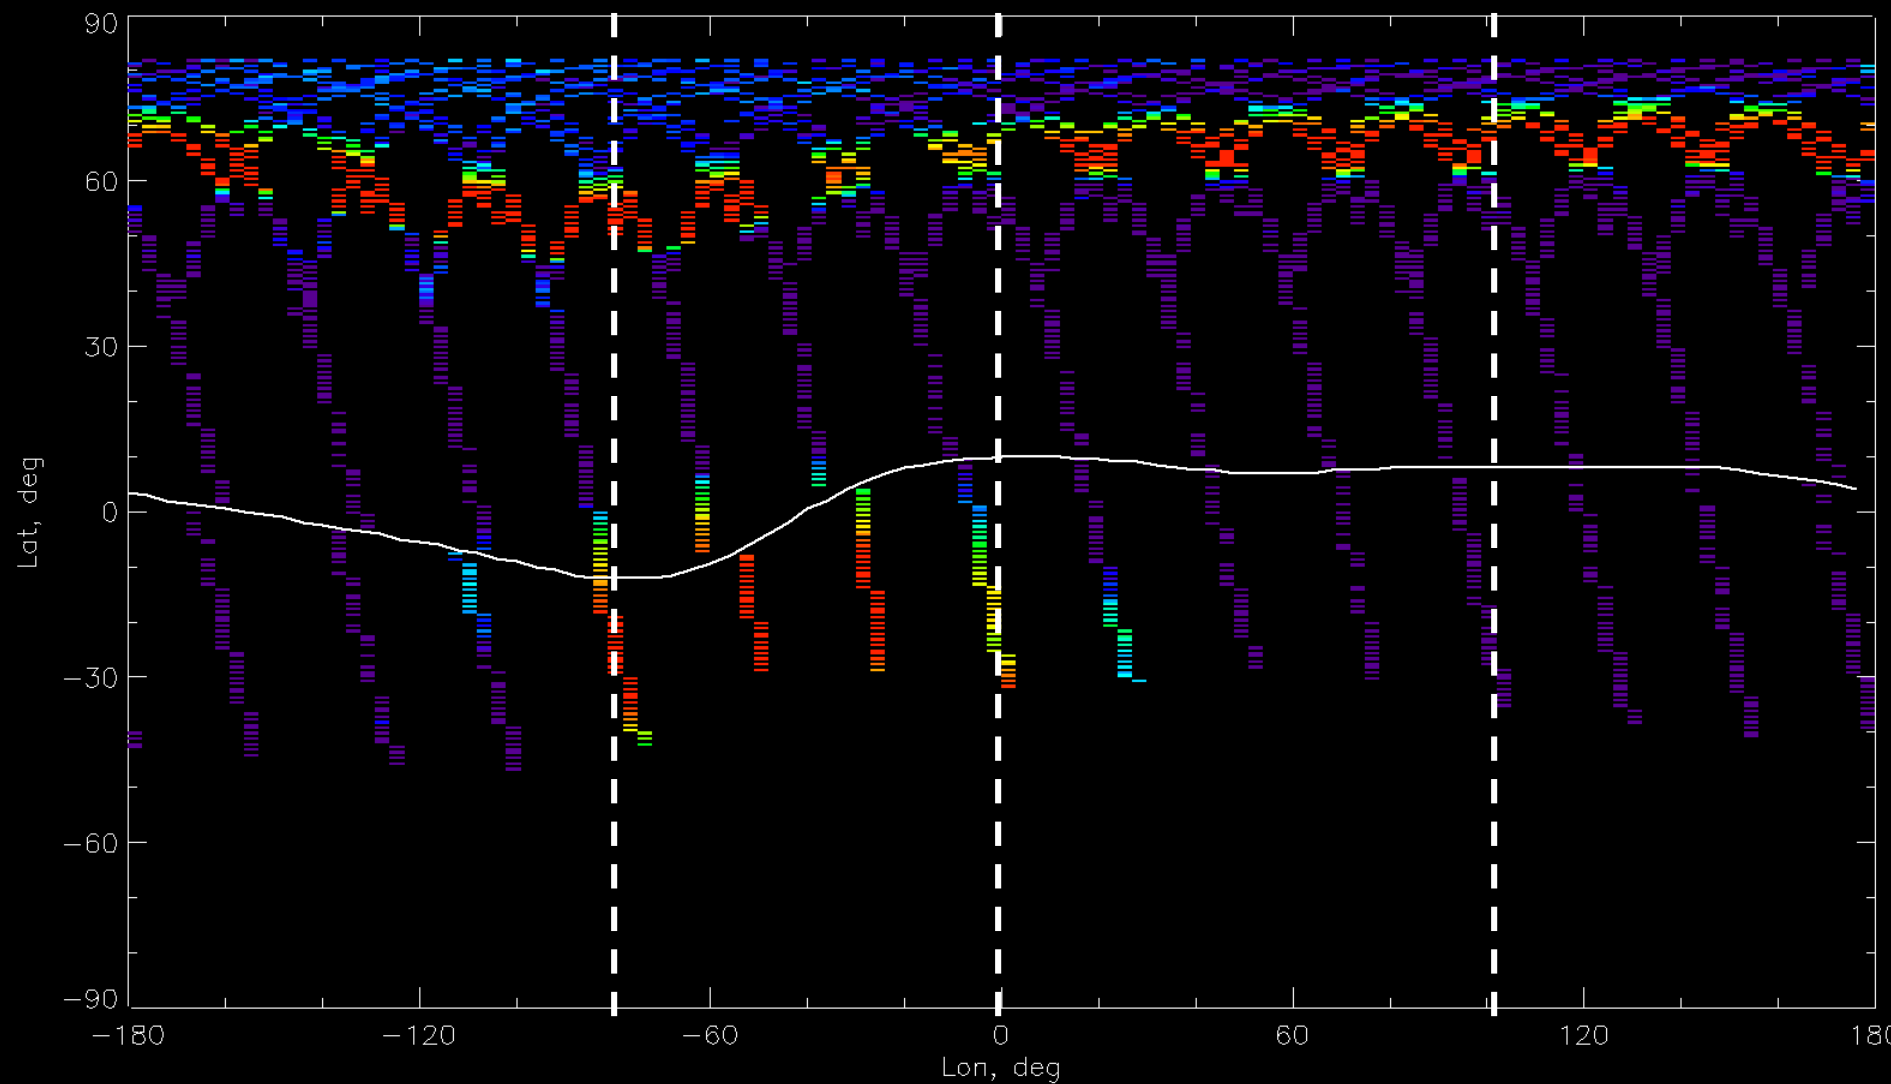

POES  $e > 300$  keV PA=90 avr 2013/08/16 0h - dt=24h

min/max: 1.0E+000/1.0E+005

POES\_mapGsum\_05

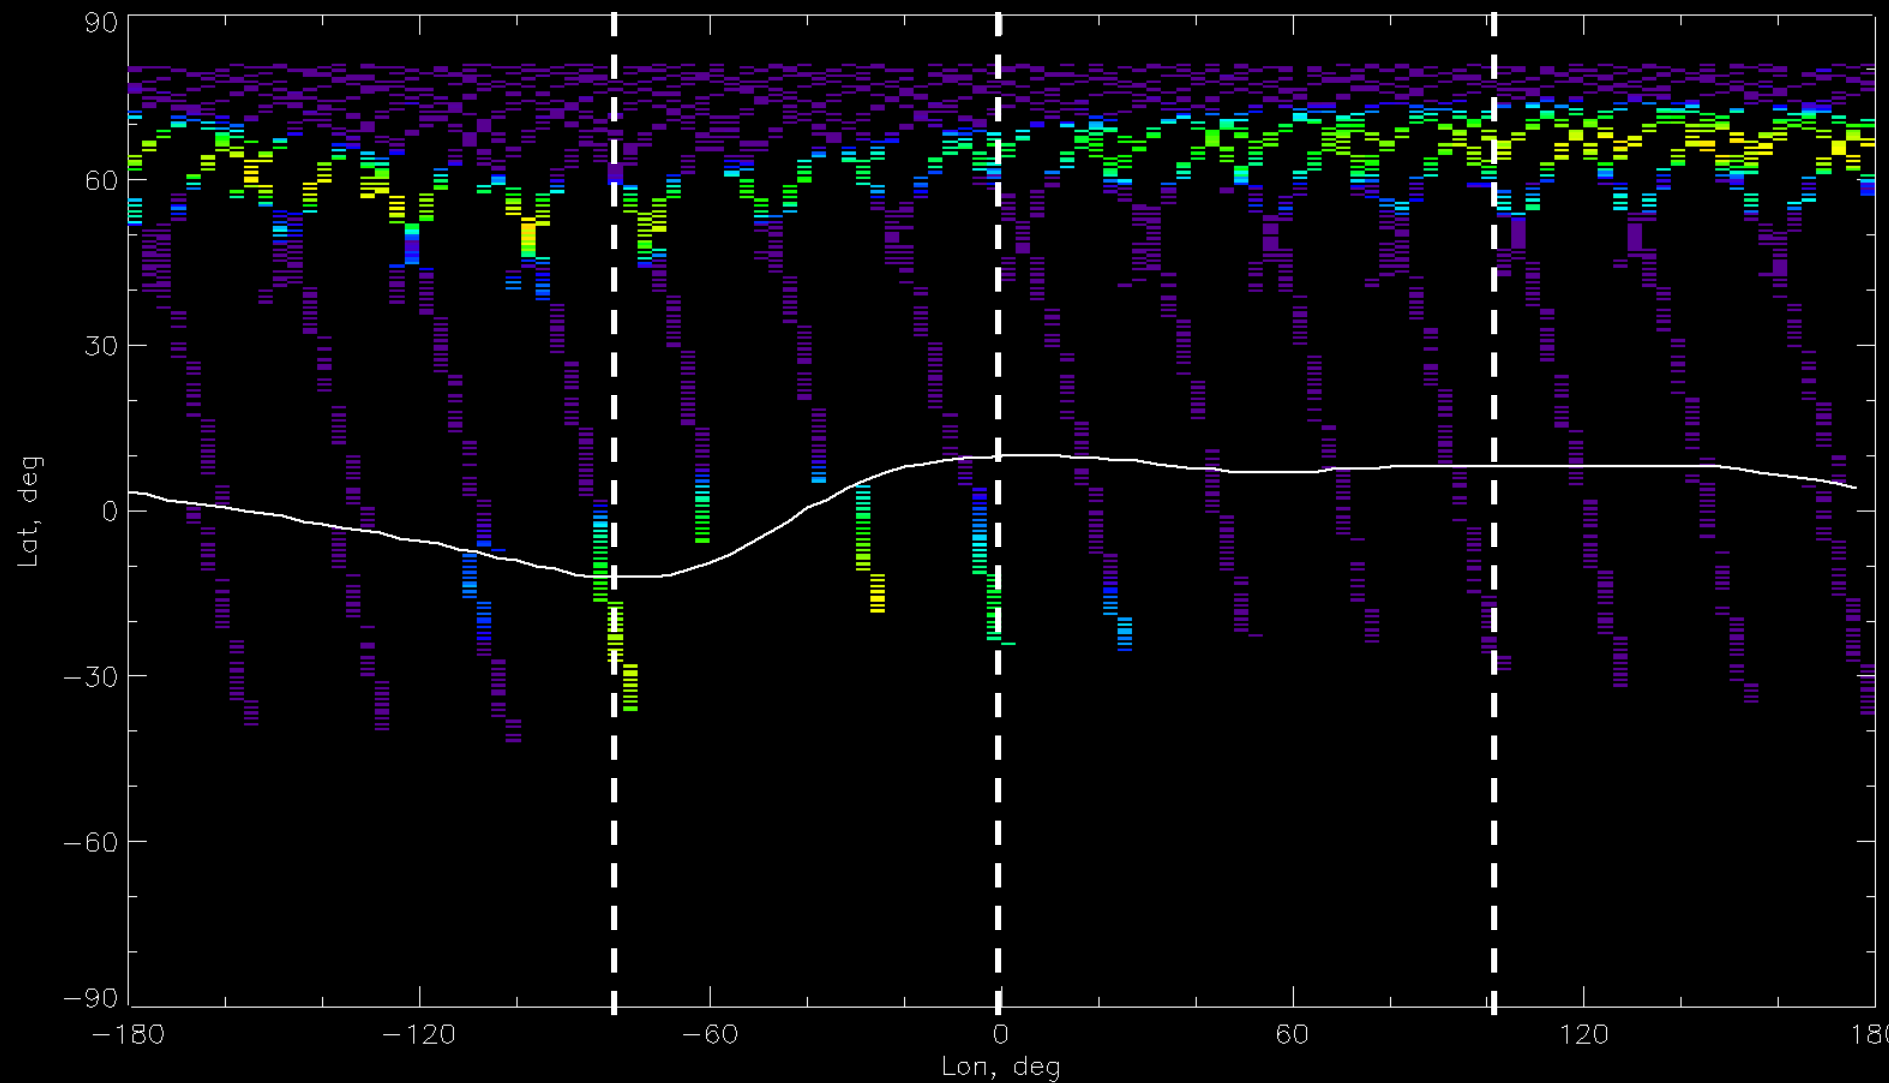

POES  $e > 300$  keV PA=90 avr 2014/08/01 0h - dt=36hmin/max:  $1.0E-001/1.0E+004$ 

POES\_mapGsum\_05

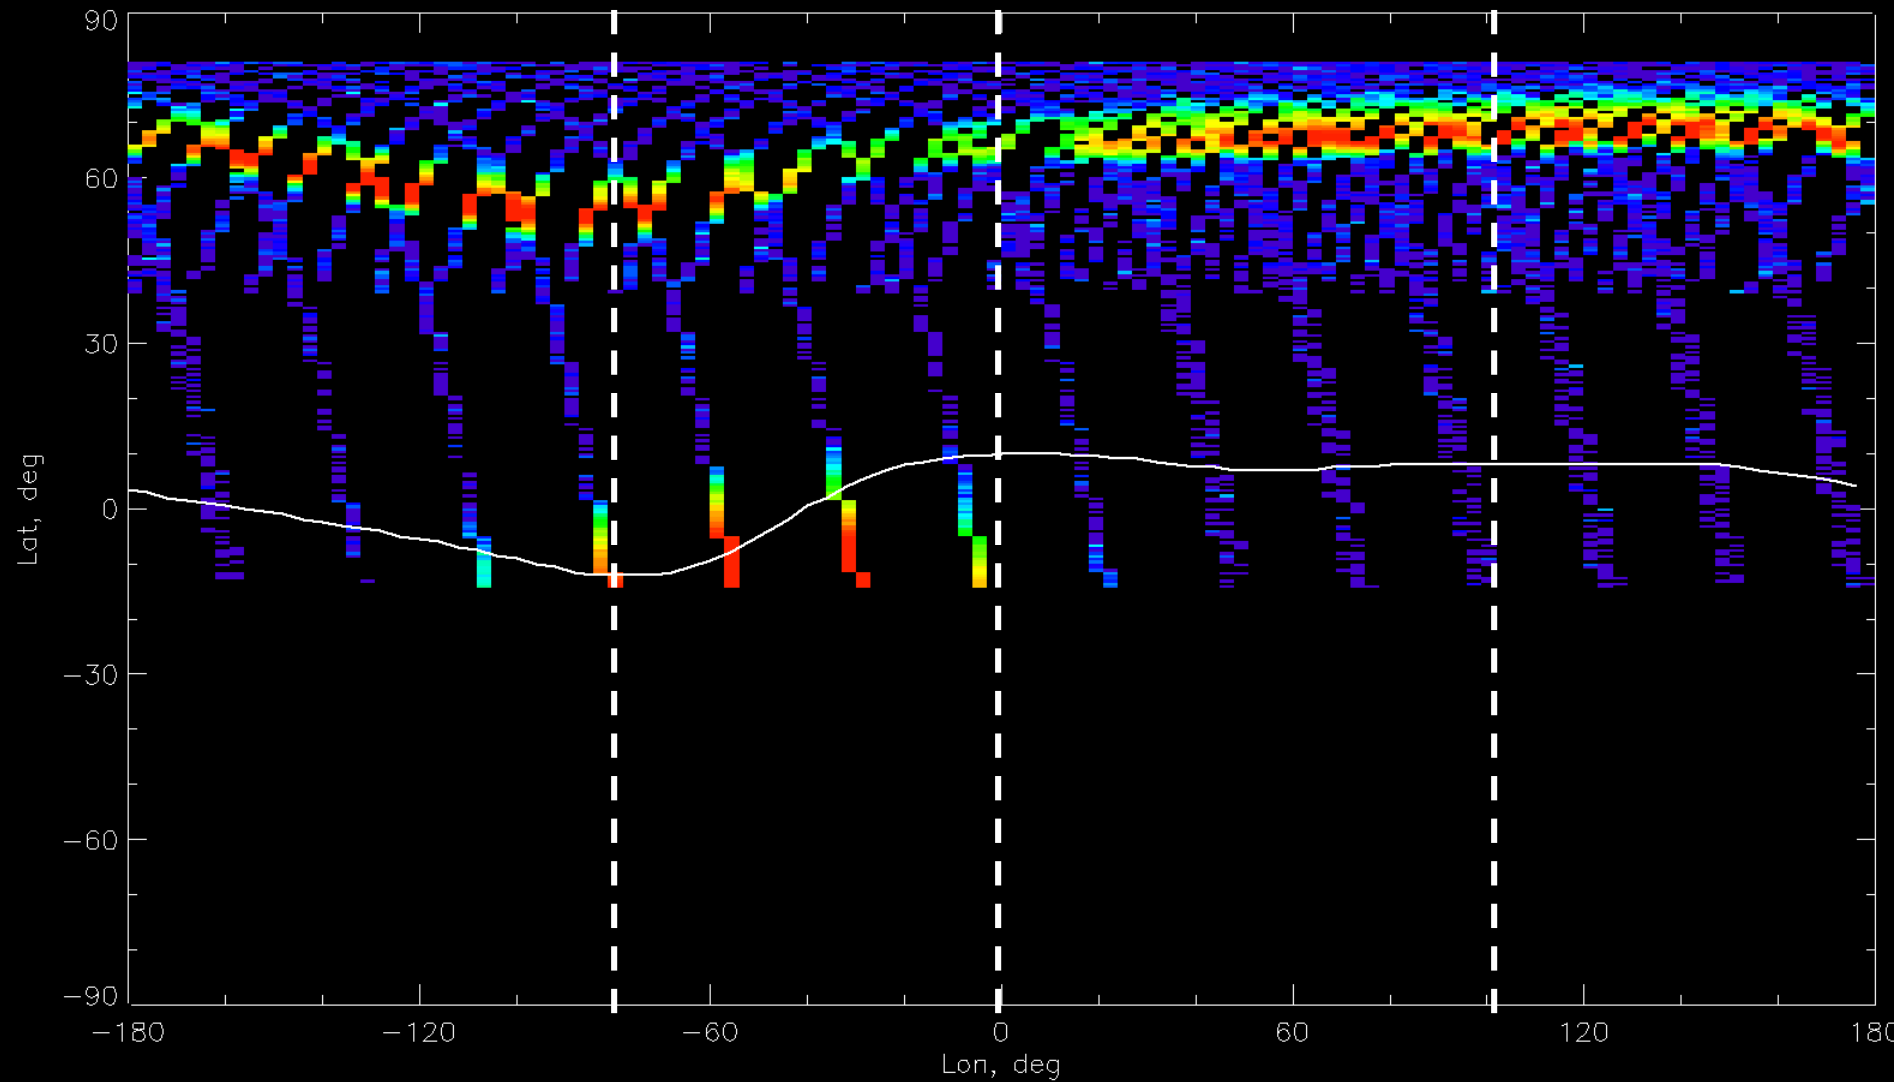

POES  $e > 300$  keV PA=90 avr 2015/08/04 0h - dt=24hmin/max:  $1.0E-001/1.0E+004$ 

POES\_mapGsum\_05

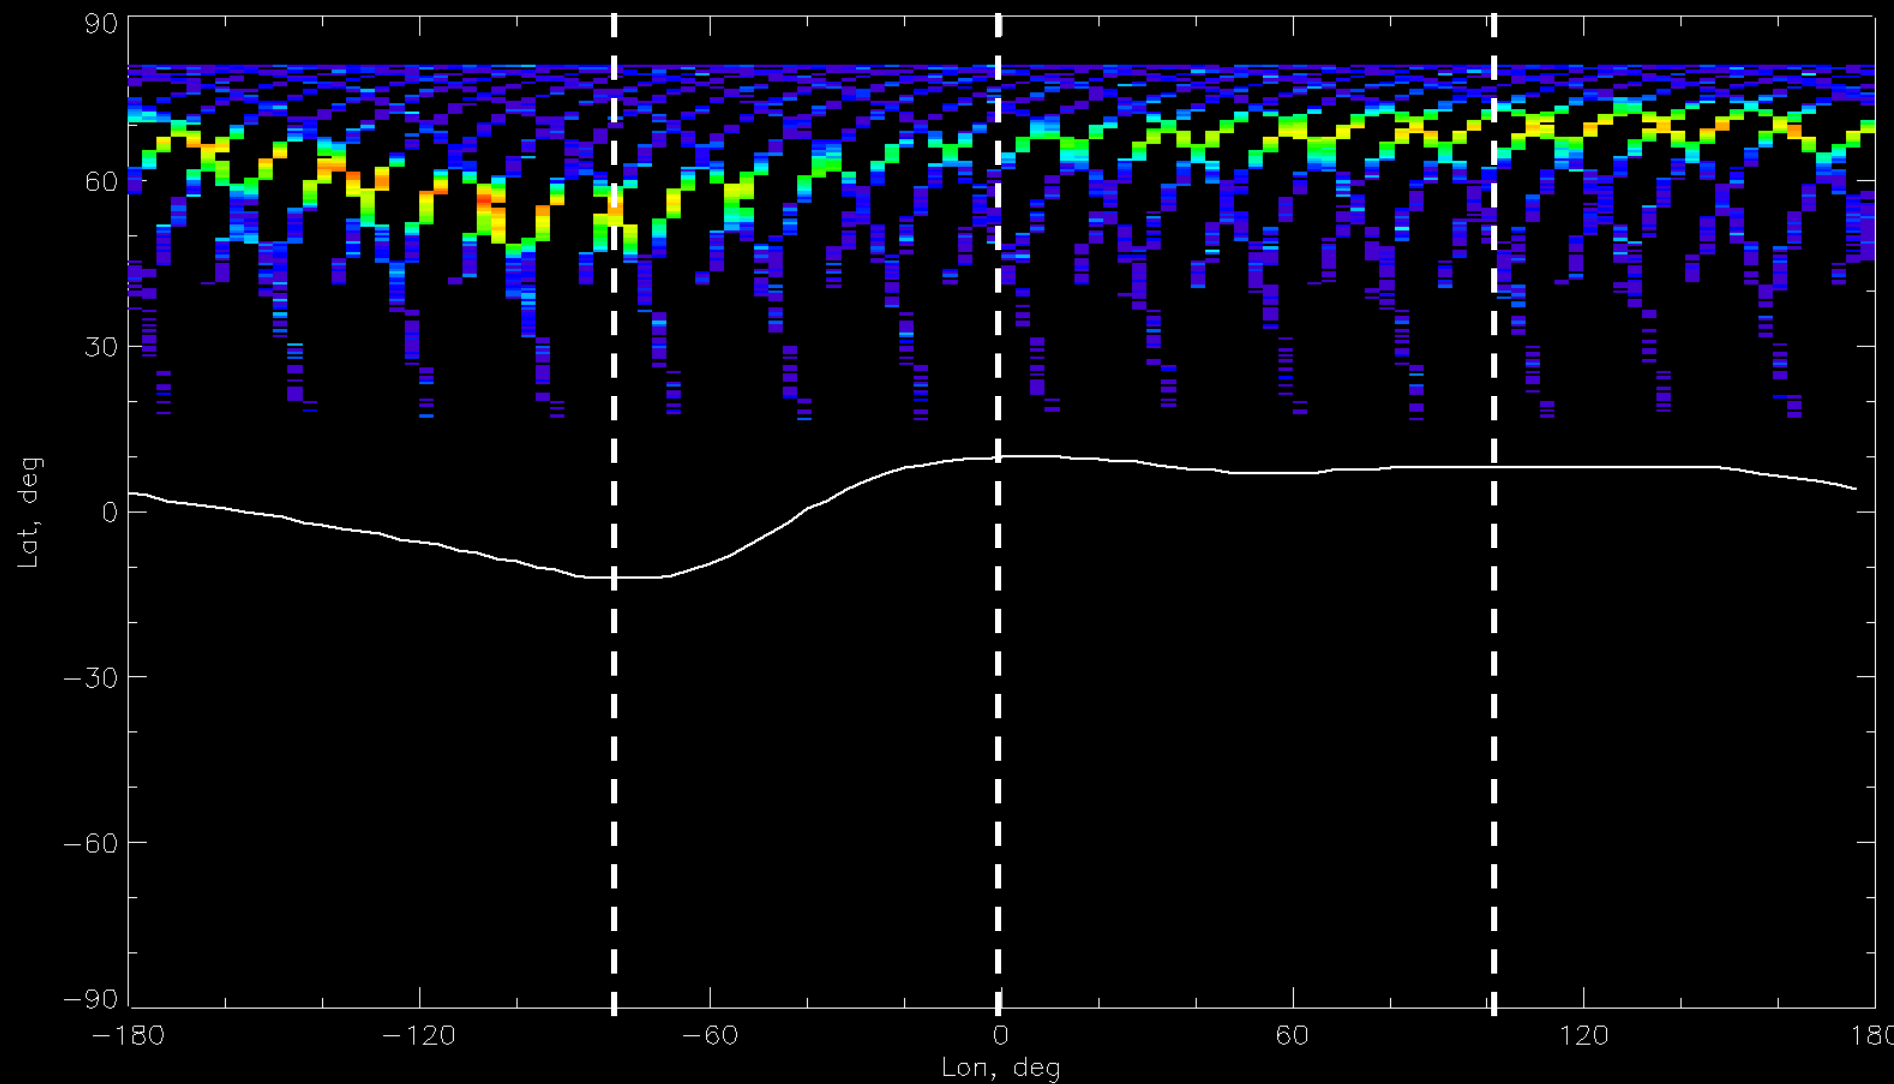



POES e &gt; 300 keV PA=90 avr 2016/06/03 0h - dt=24h

min/max: 1.0E+002/1.0E+004

POES\_mapGsum\_05

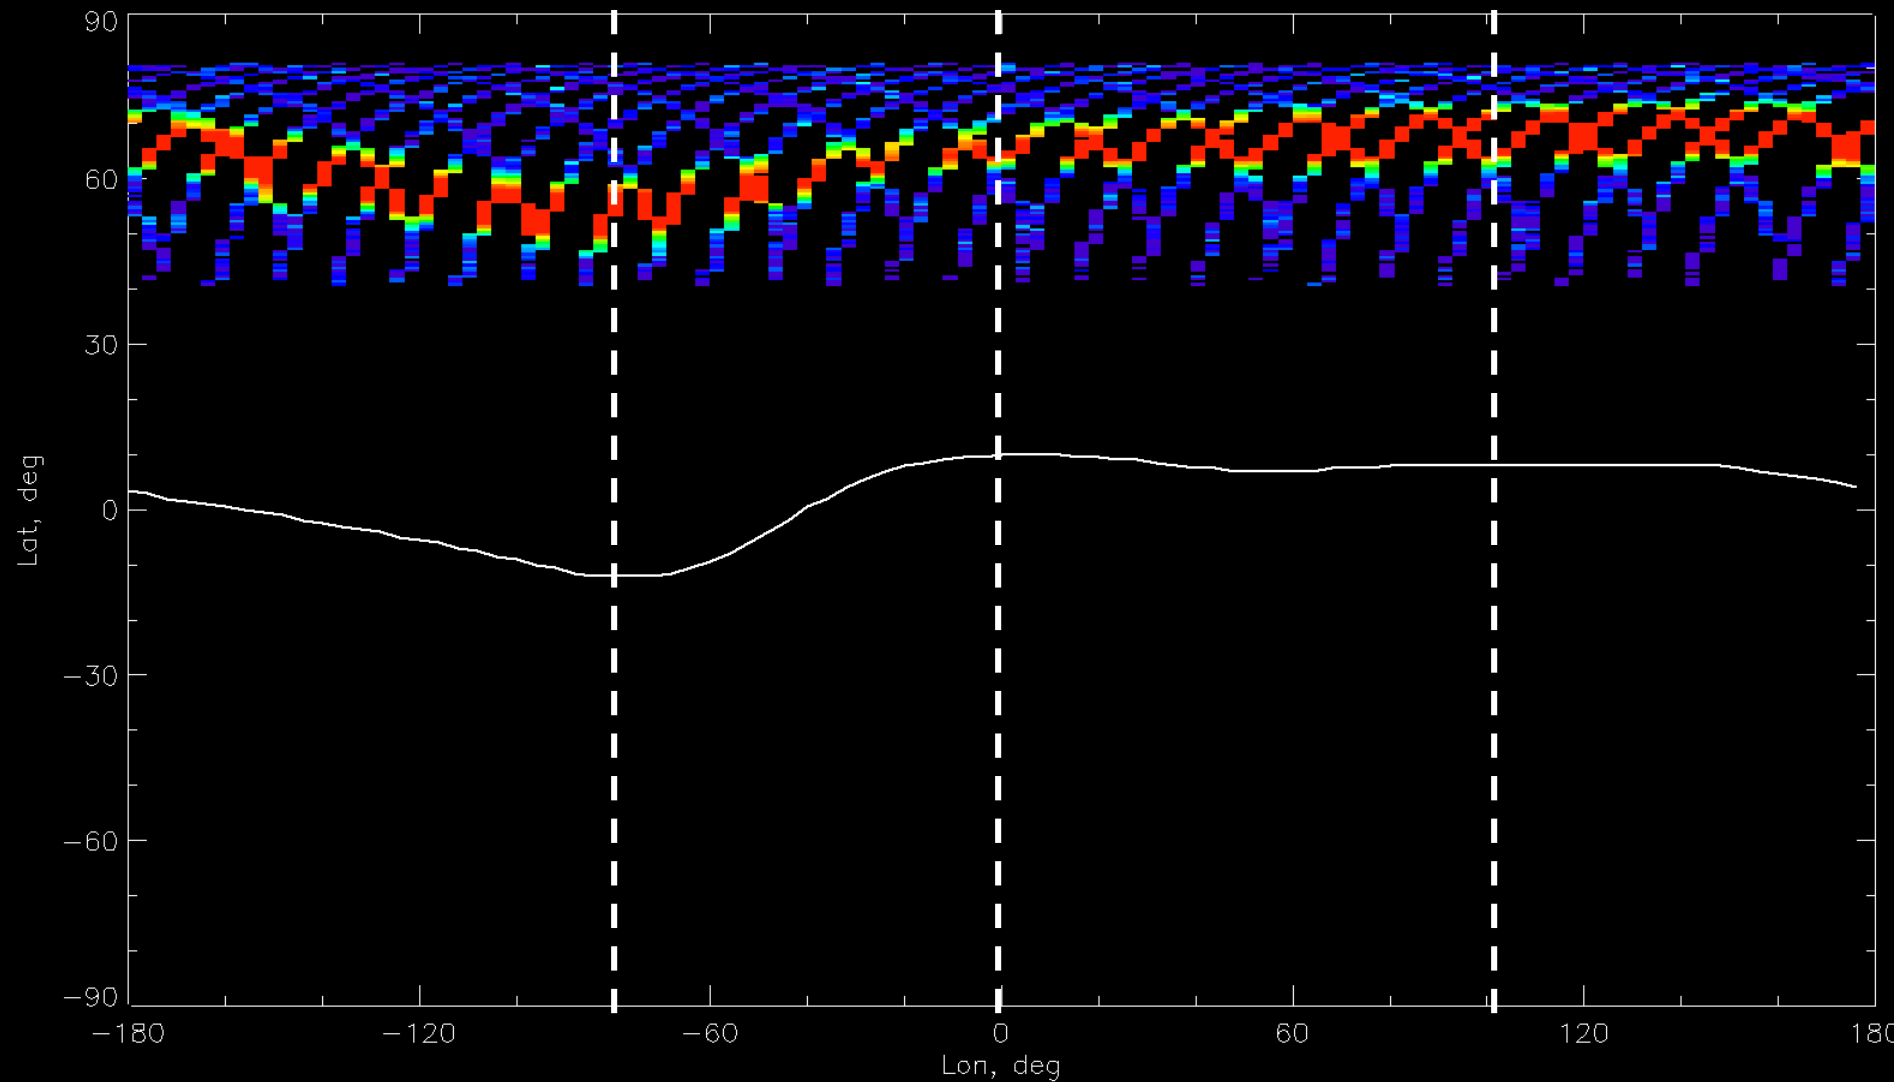

POES  $e > 300$  keV PA=90 avr 2017/08/09 6h - dt=24h

min/max: 1.0E+000/1.0E+005

POES\_mapGsum\_05

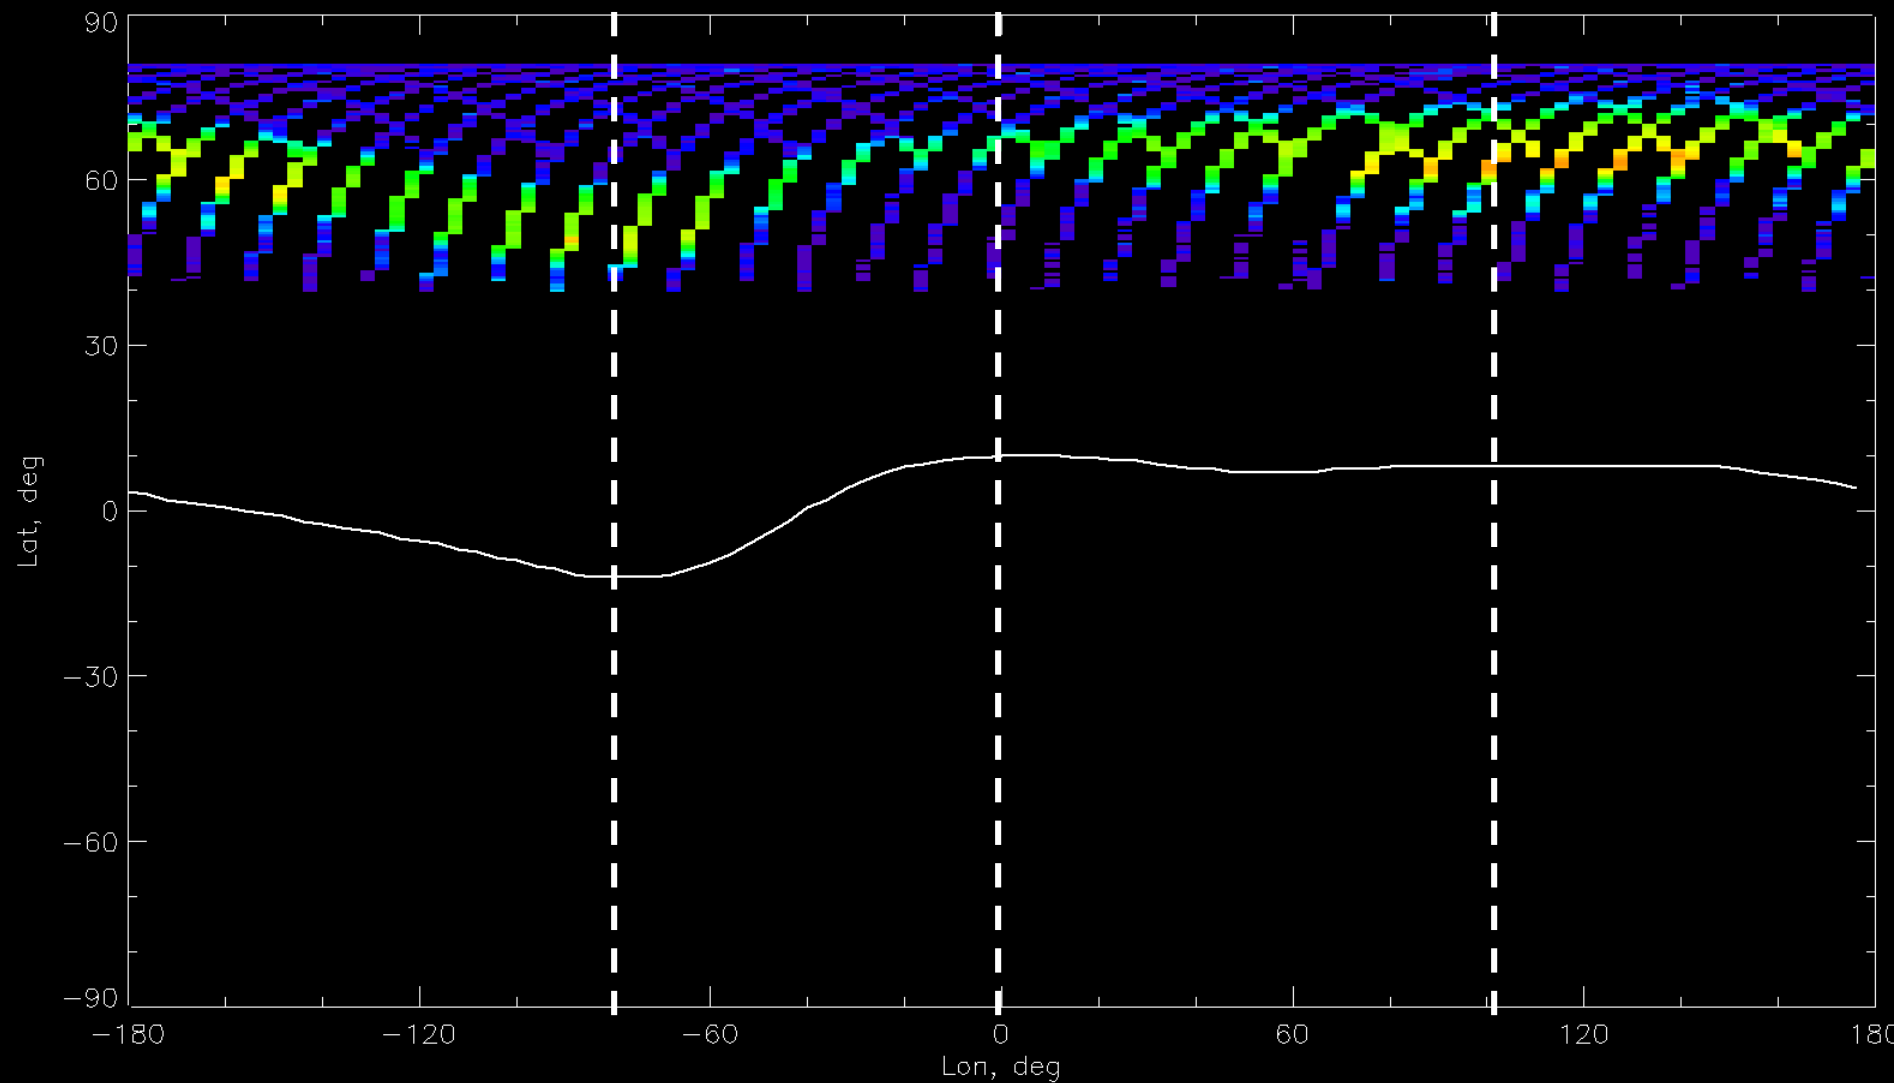

POES e &gt; 300 keV PA=90 avr 2018/06/12 08h - dt=24h

min/max: 1.0E+002/1.0E+004

POES\_mapGsum\_05

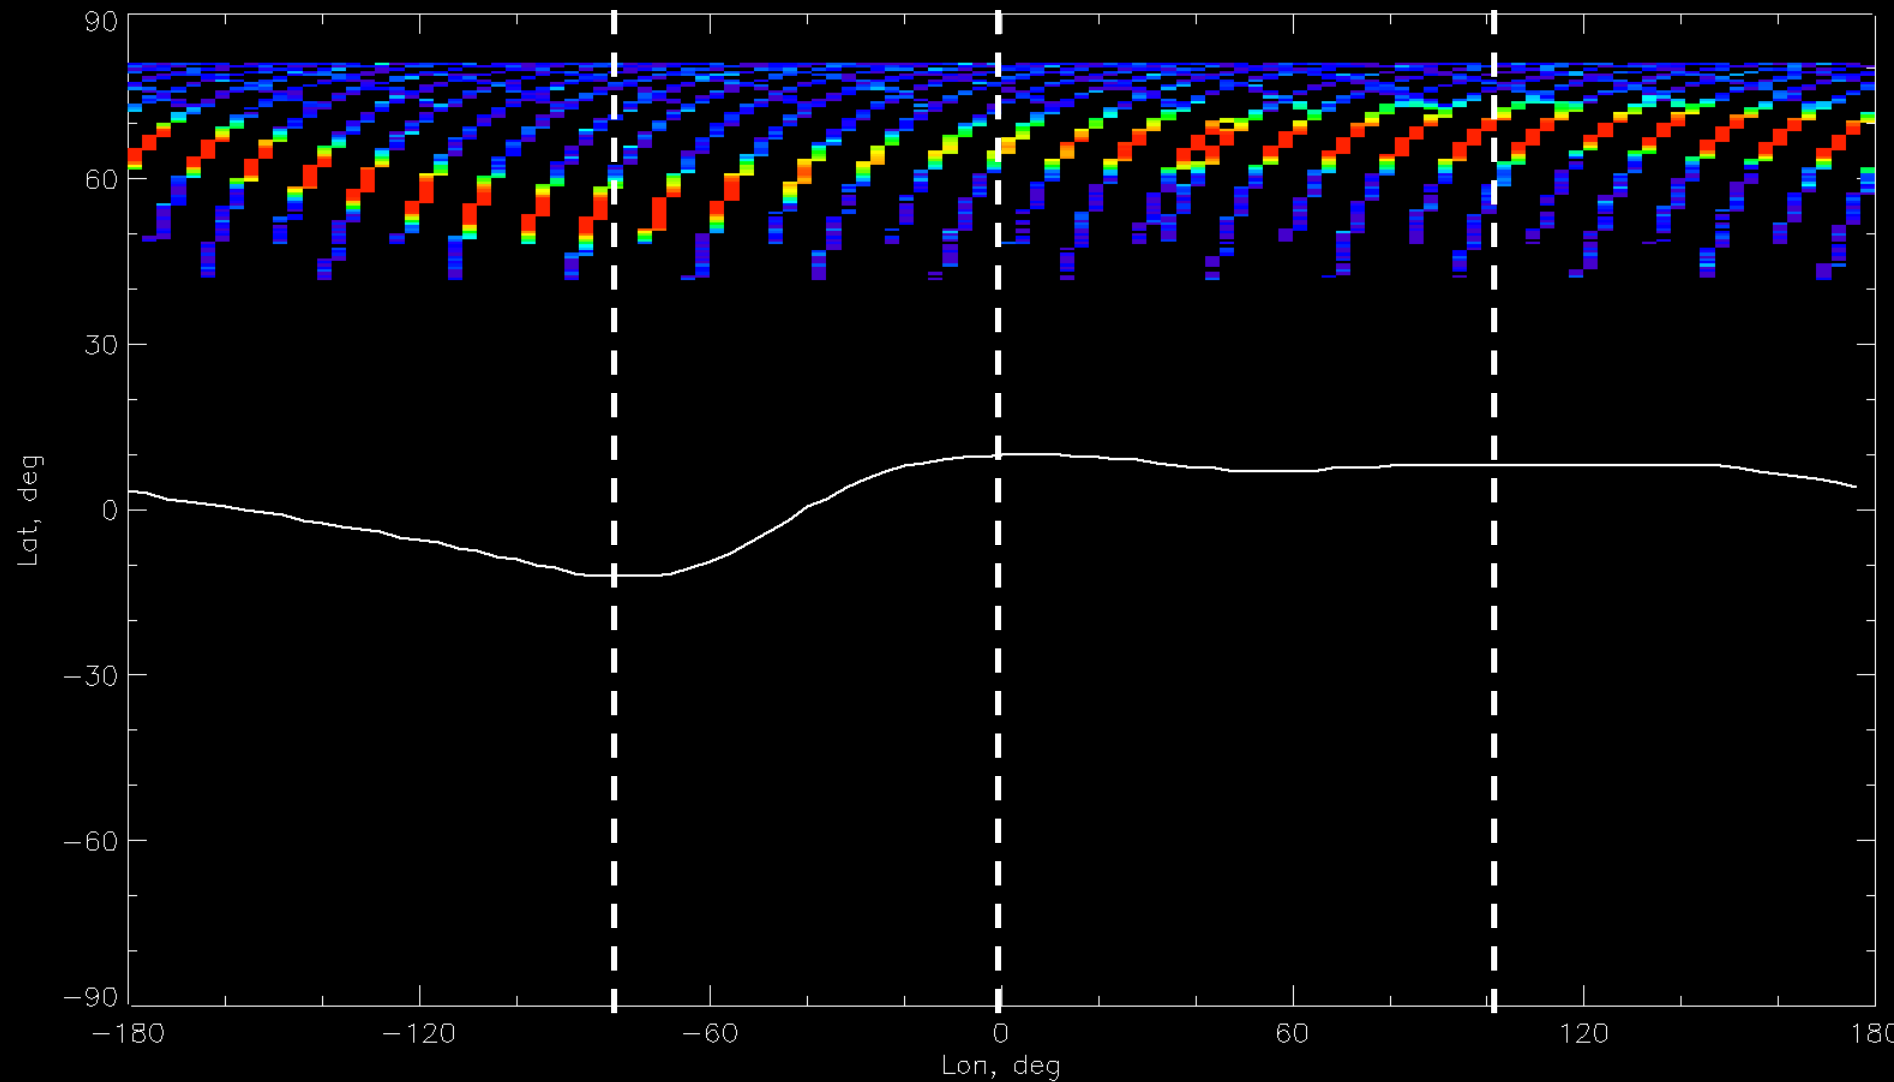

Supplement: Supplementary file 1 [file angeo-37-719-2019-supplement.pdf]
